# Supplementary material
Source: PubMed Central journal article supplement (PMC6759776)
Supplement: jo9b01258_si_001.pdf [file jo9b01258_si_001.pdf]

# **Pd-catalyzed De Novo Assembly of Diversely Substituted Indole-Fused Polyheterocycles**

Qian Wang<sup>†</sup>, Angelina Osipyan<sup>†</sup>, Markella Konstantinidou<sup>†</sup>, Roberto Butera<sup>†</sup>,  
Kumchok C. Mgimpatsang<sup>†</sup>, Svitlana V. Shishkina<sup>‡</sup> and Alexander Dömling<sup>†\*</sup>

<sup>†</sup> University of Groningen, Department of Drug Design, A. Deusinglaan 1, 9713 AV Groningen,  
The Netherlands

<sup>‡</sup> SSI “Institute for Single Crystals,” National Academy of Science of Ukraine, 60 Lenina Ave.,  
Kharkiv 61001, Ukraine.

\*e-mail: a.s.s.domling@rug.nl, [www.drugdesign.nl](http://www.drugdesign.nl)

## Table of contents

|                                                                                                   |          |
|---------------------------------------------------------------------------------------------------|----------|
| Characterization of products ( $^1\text{H}$ NMR & $^{13}\text{C}\{^1\text{H}\}$ NMR spectra)..... | S3-S38   |
| Docking procedure.....                                                                            | S39      |
| X-ray structure determination.....                                                                | S39-S40  |
| References.....                                                                                   | S40- S41 |

**5a: *N*-(2-(*tert*-butylamino)-2-oxoethyl)-*N*-phenyl-1*H*-indole-2-carboxamide**

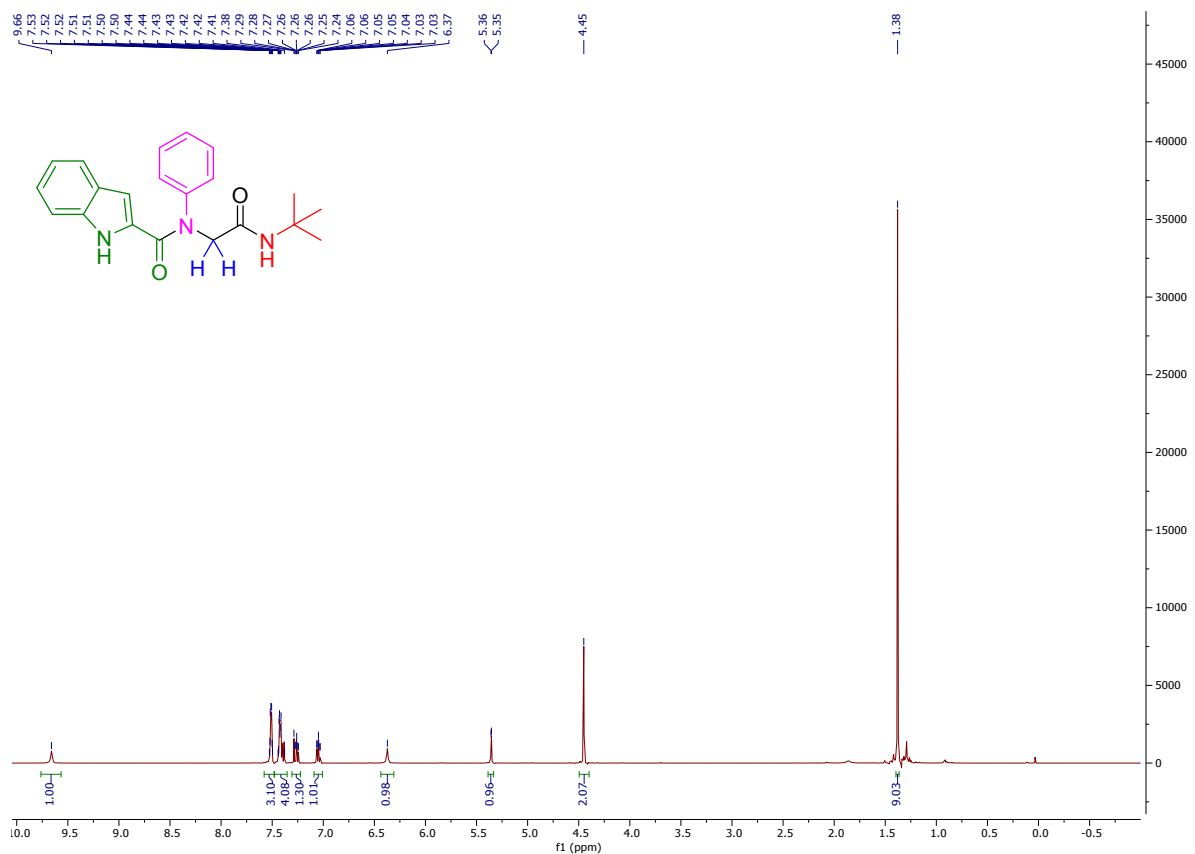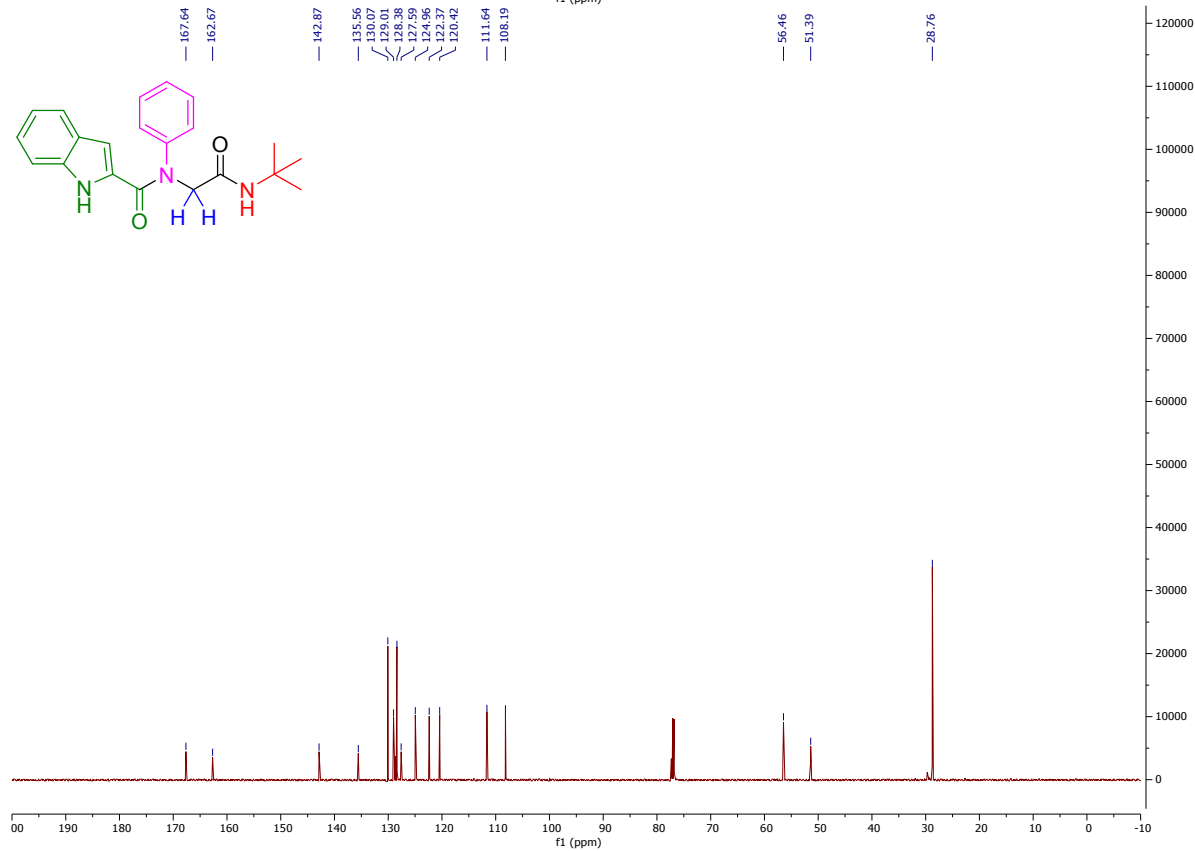

**5b: *N*-(2-(*tert*-butylamino)-2-oxoethyl)-*N*-(4-chlorophenyl)-1*H*-indole-2-carboxamide**

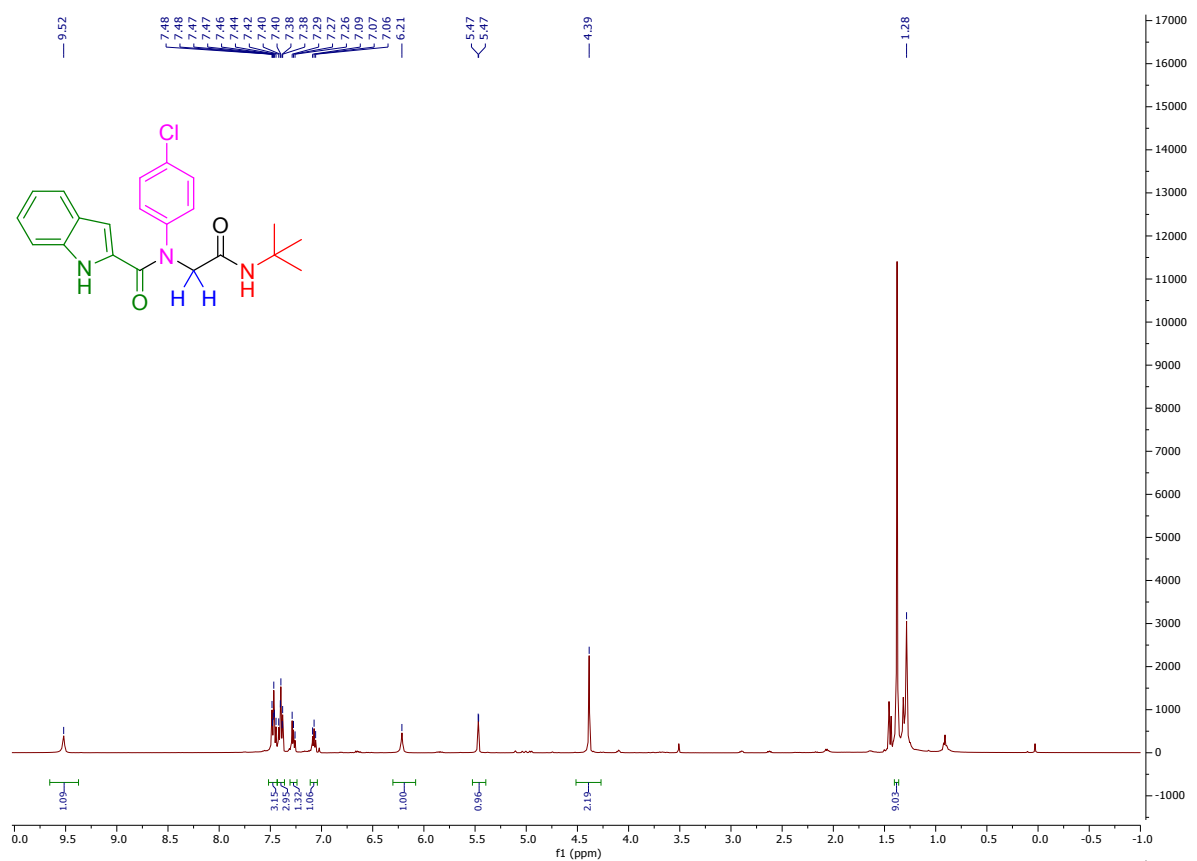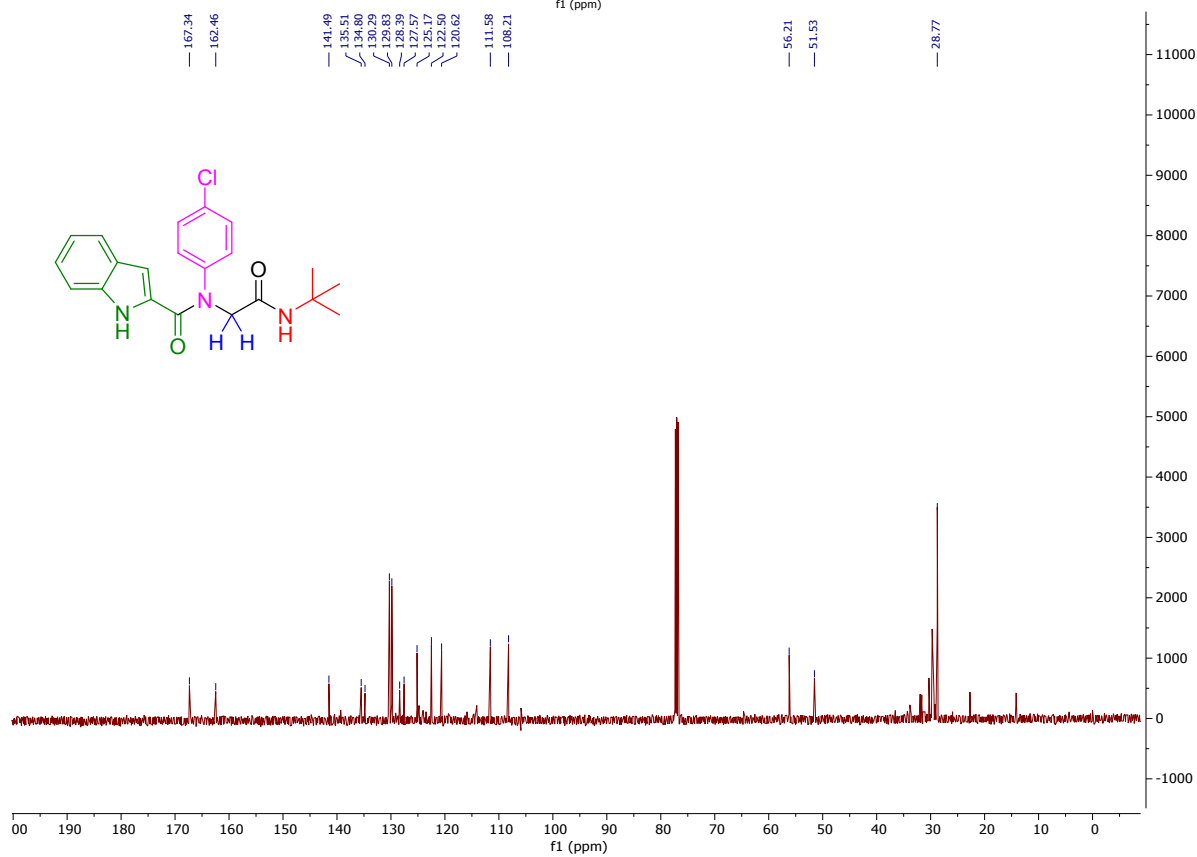

**5c: *N*-(2-(*tert*-butylamino)-2-oxoethyl)-*N*-(*p*-tolyl)-1*H*-indole-2-carboxamide**

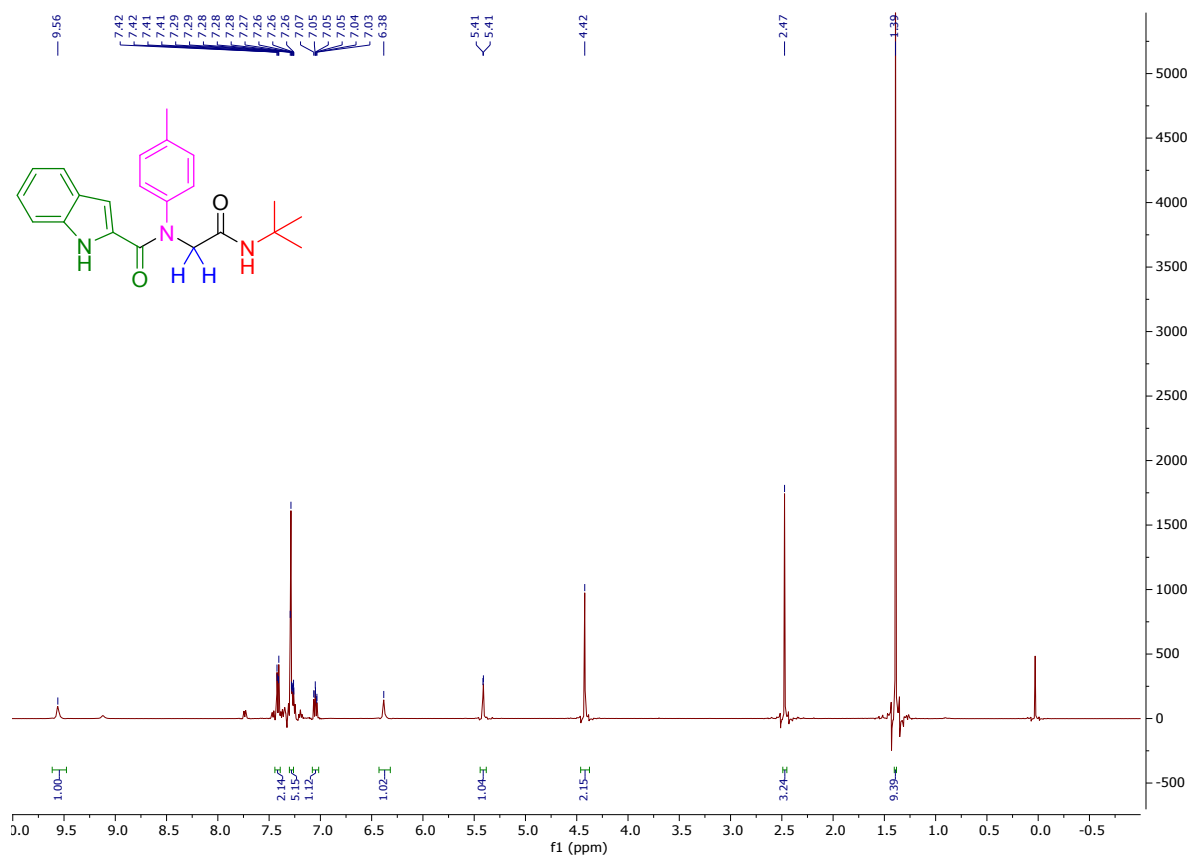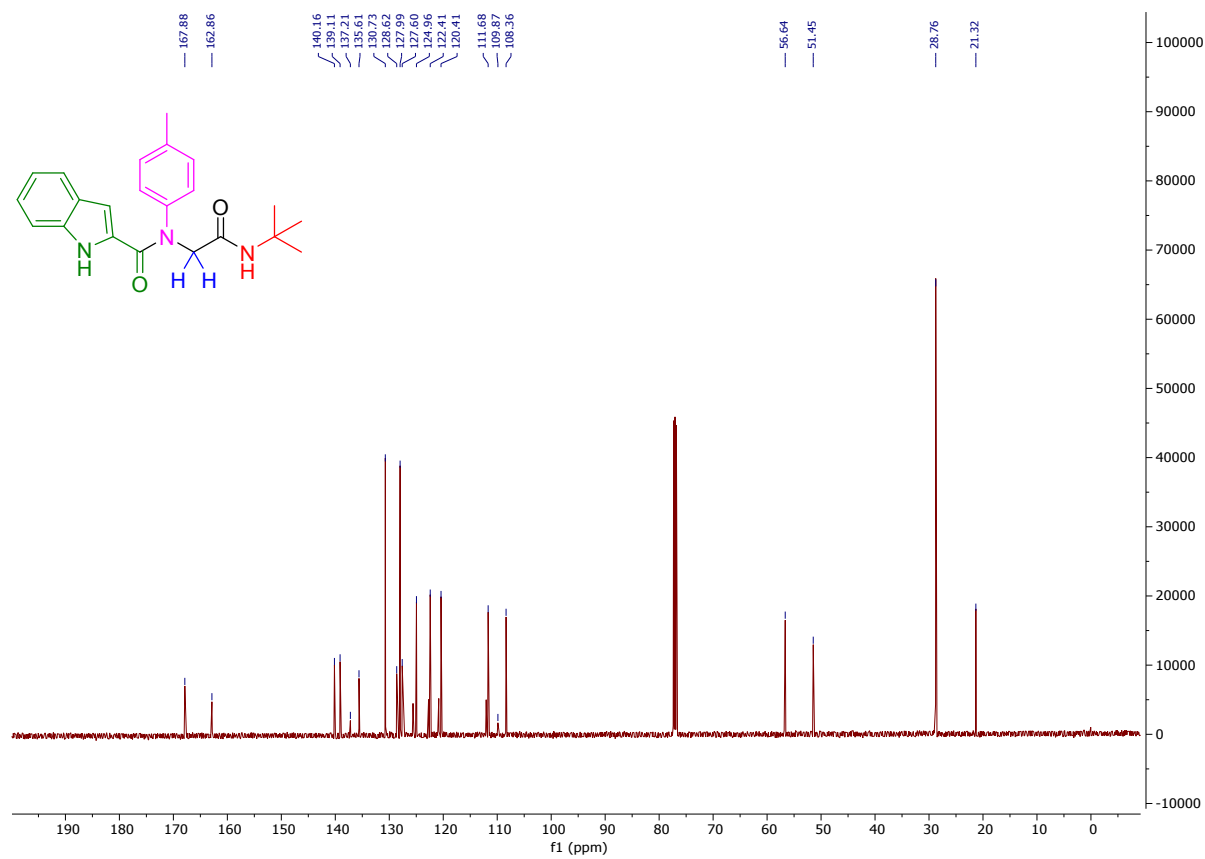

**5d: *N*-(2-(*tert*-butylamino)-2-oxo-1-phenylethyl)-*N*-phenyl-1*H*-indole-2-carboxamide**

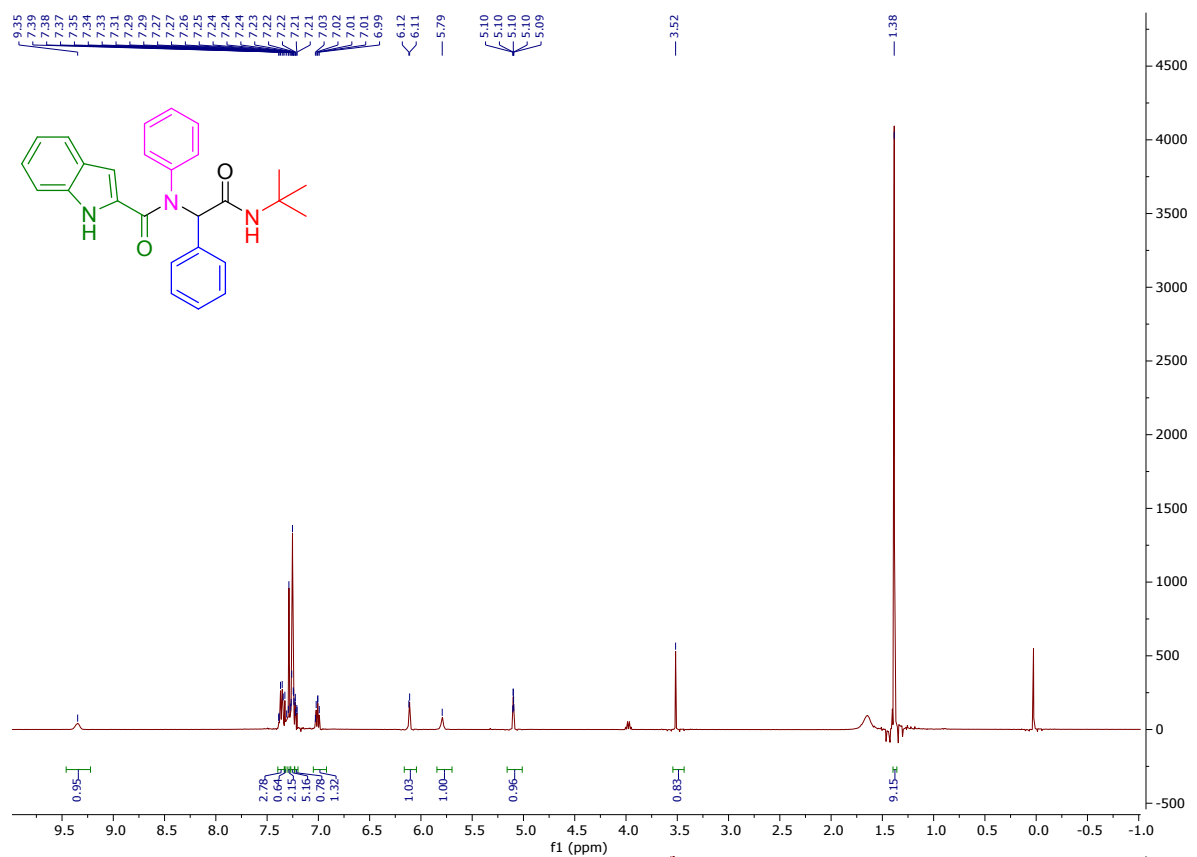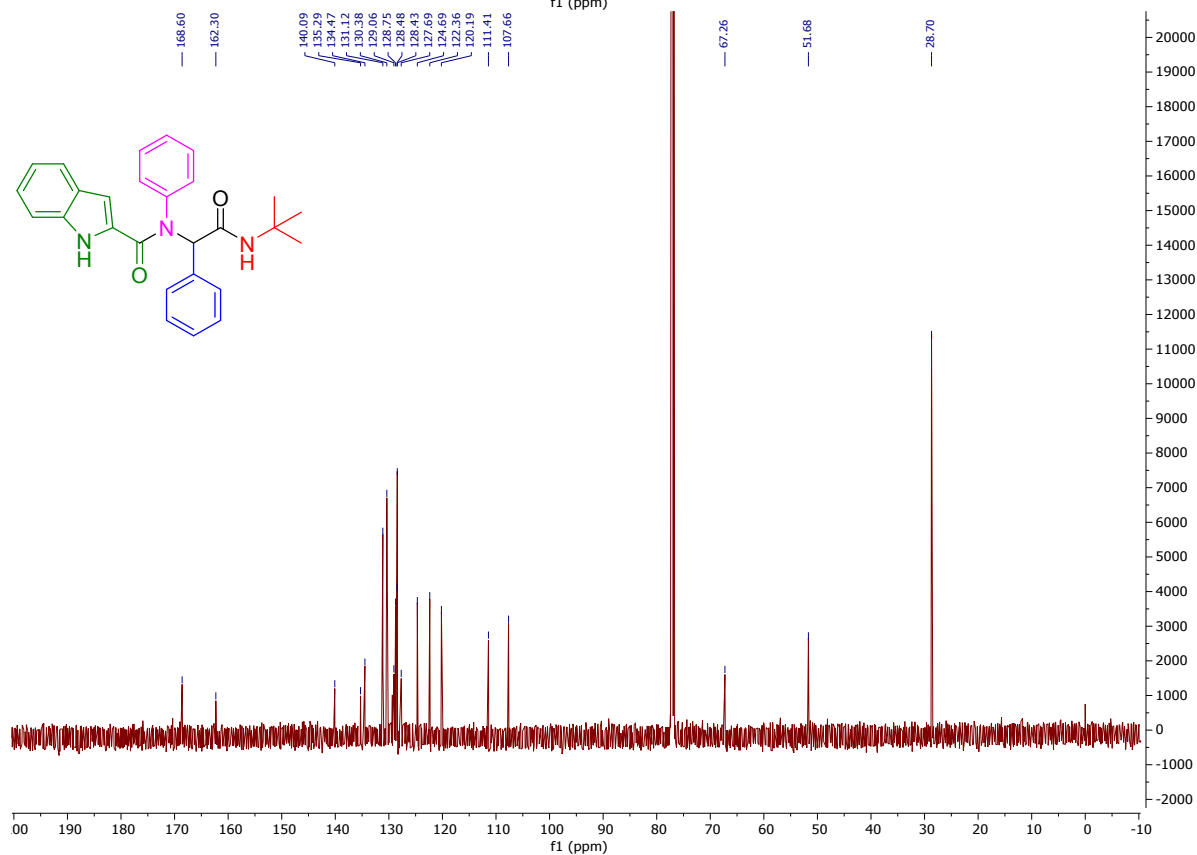

**5e: *N*-(2-(*tert*-butylamino)-2-oxoethyl)-*N*-(4-phenoxyphenyl)-1*H*-indole-2-carboxamide**

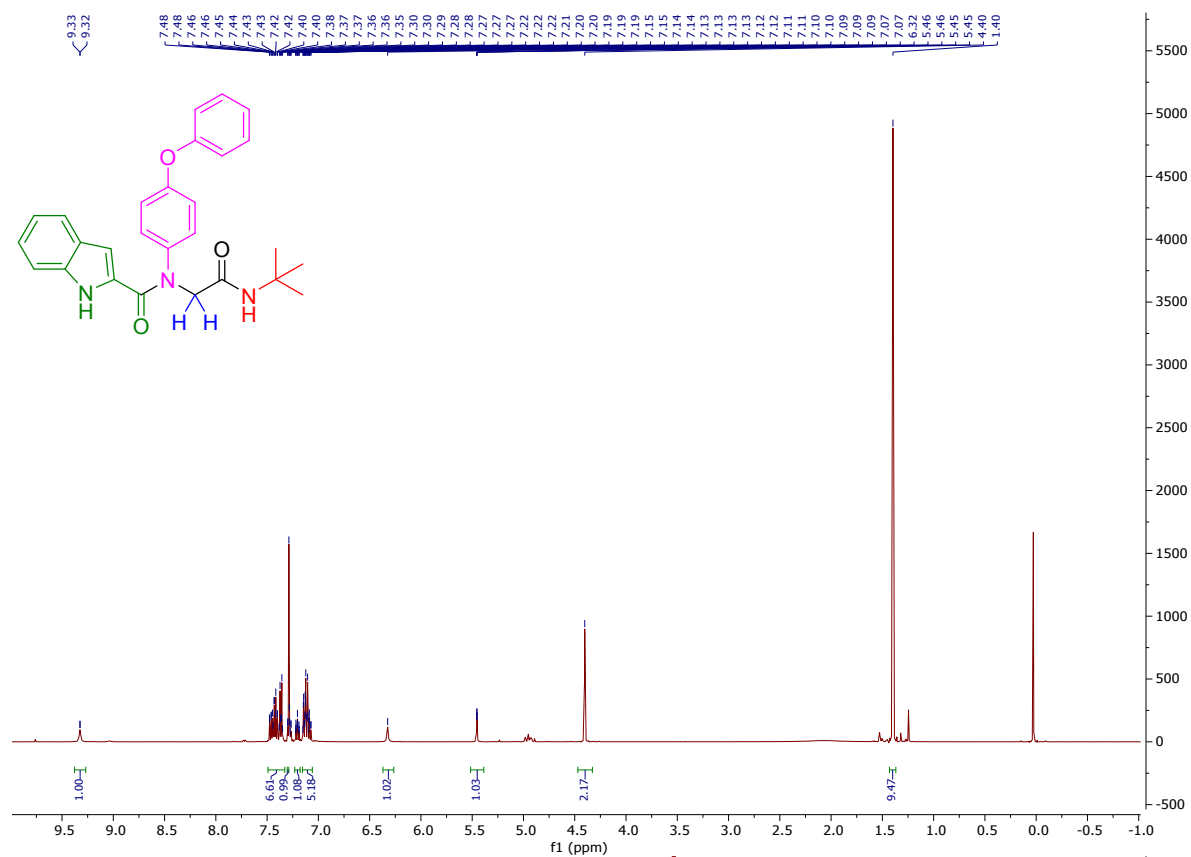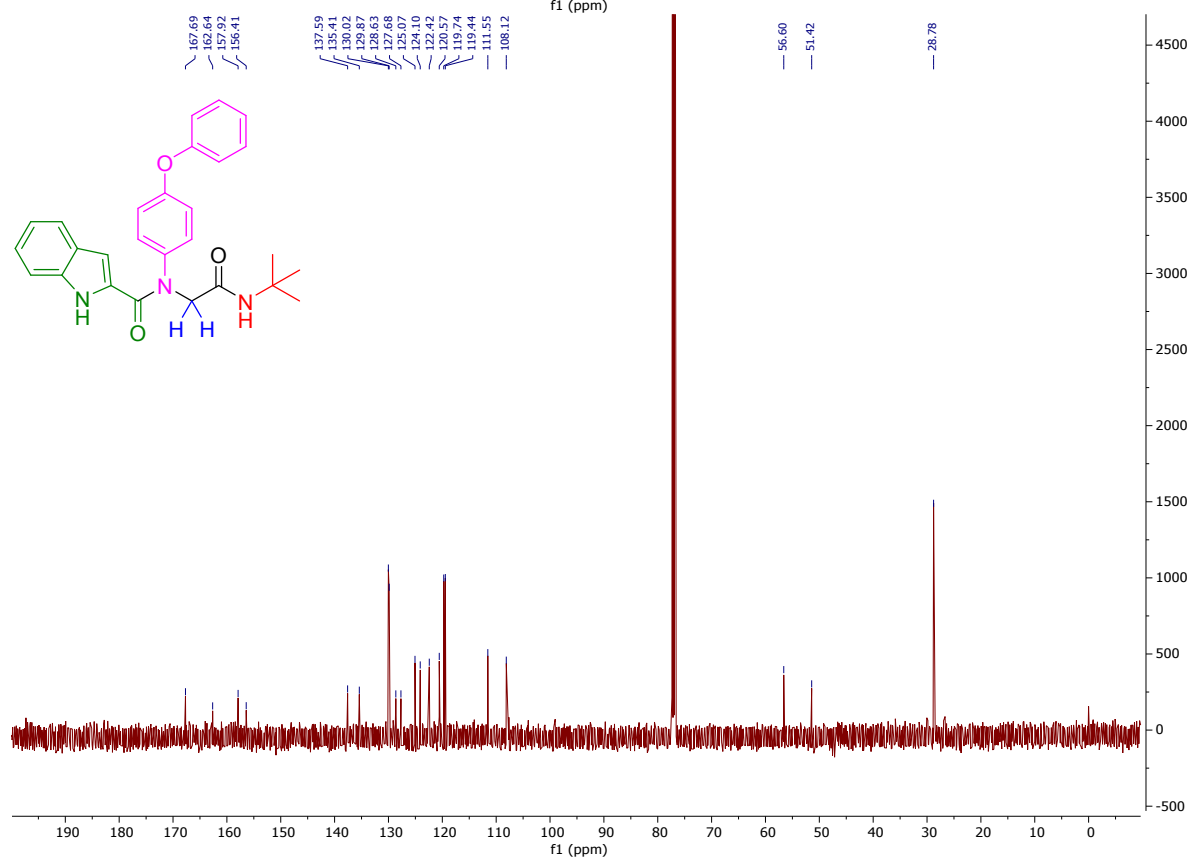

**5f: *N*-(2-(*tert*-butylamino)-2-oxoethyl)-*N*-(3,5-dimethylphenyl)-1*H*-indole-2-carboxamide**

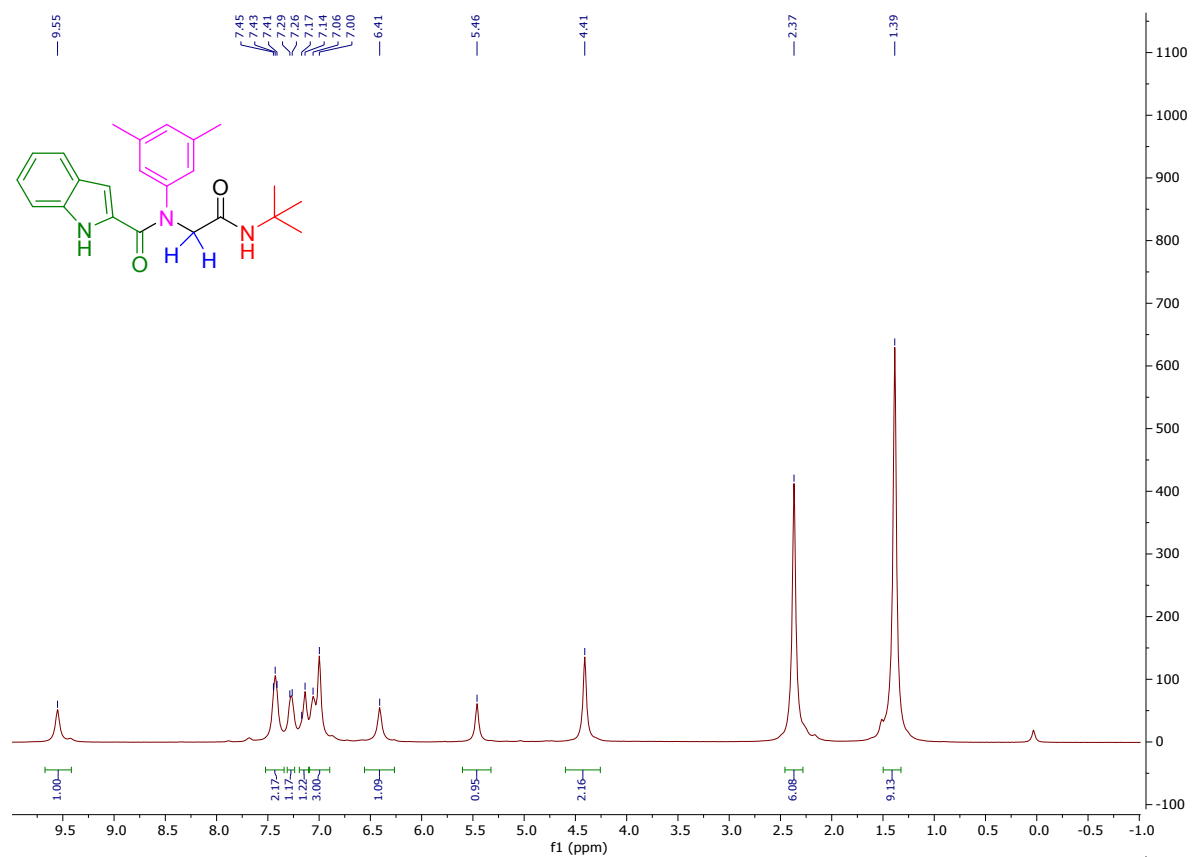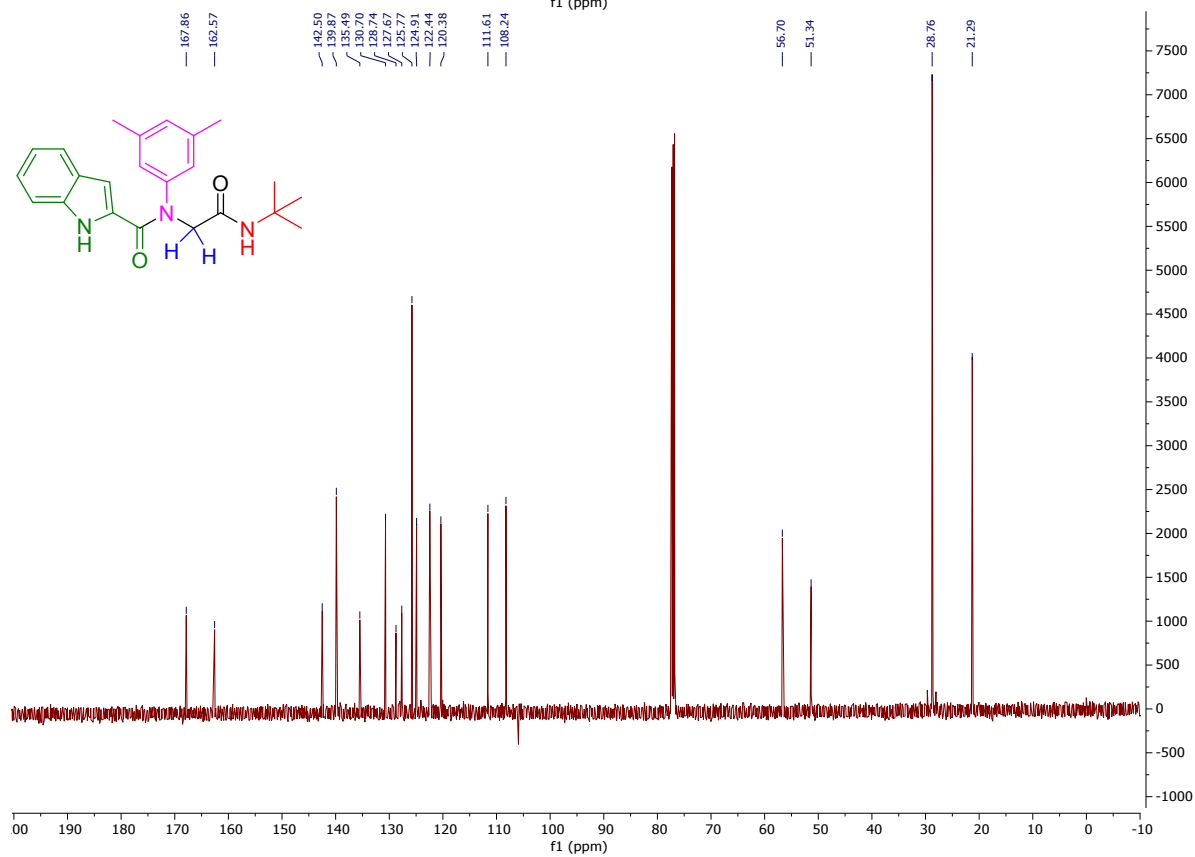



**5g: *N*-(2-(*tert*-butylamino)-2-oxoethyl)-*N*-(4-fluorophenyl)-1*H*-indole-2-carboxamide**

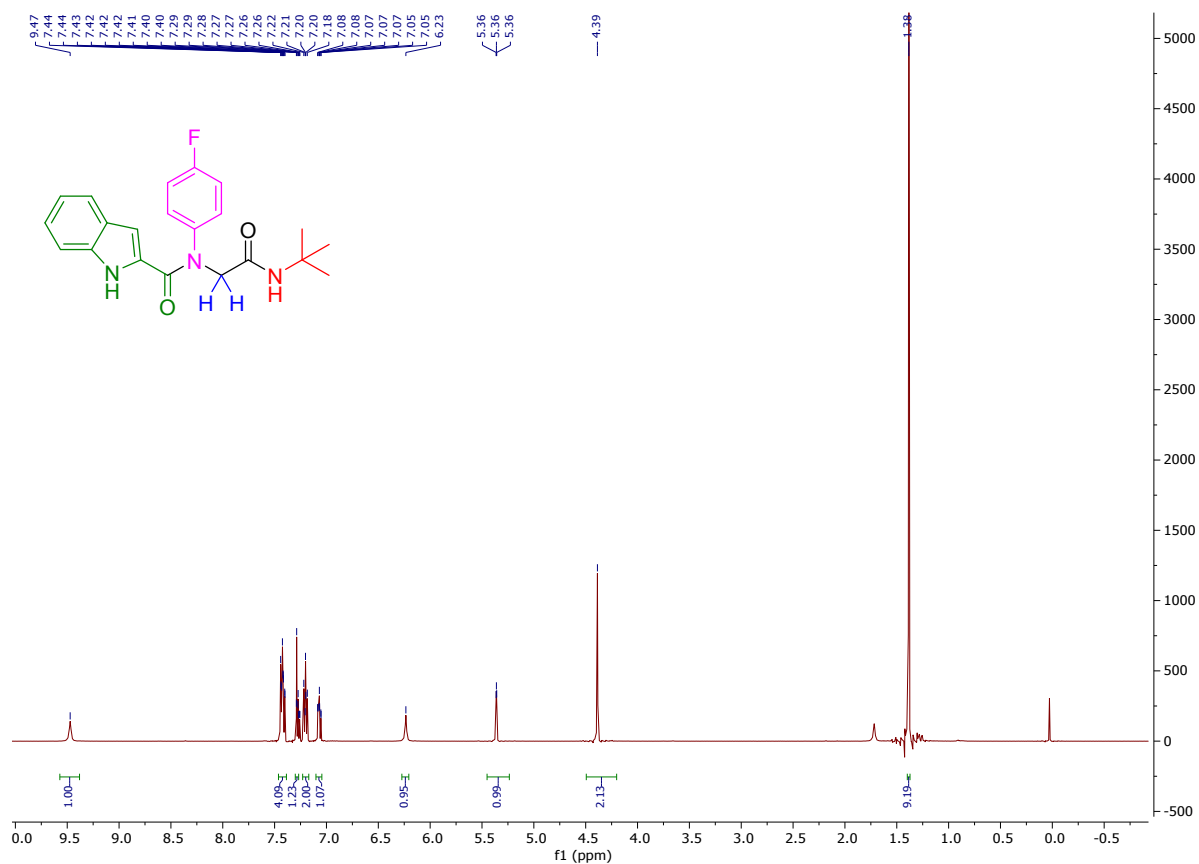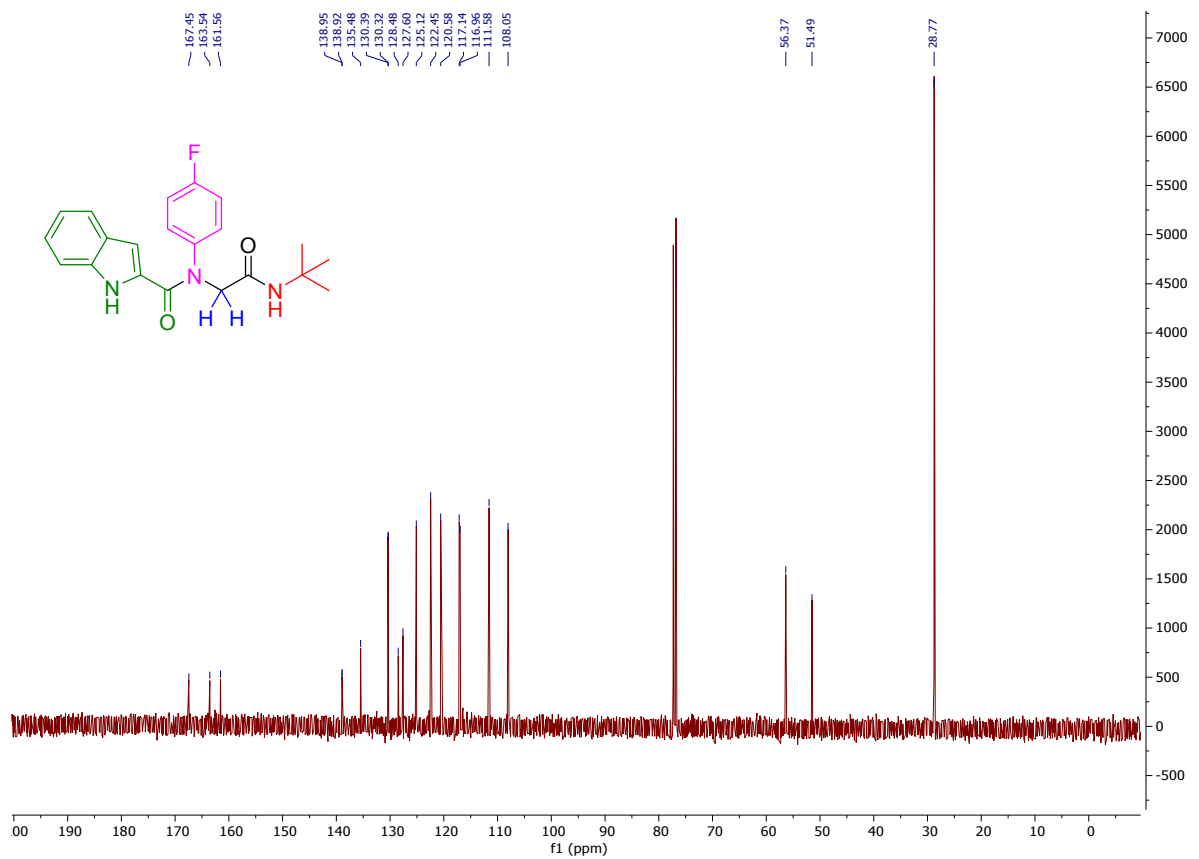

**5h: *N*-(2-(*tert*-butylamino)-1-(4-nitrophenyl)-2-oxoethyl)-*N*-phenyl-1*H*-indole-2-carboxamide**

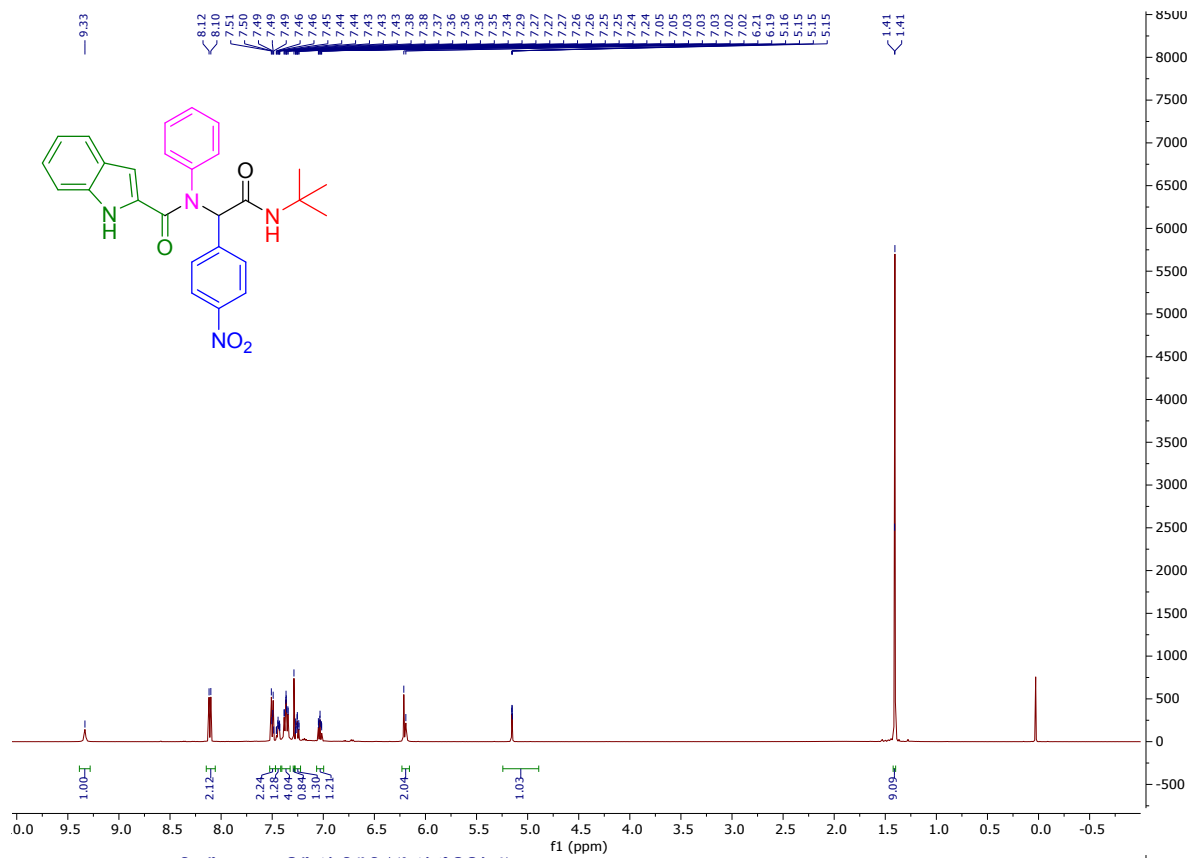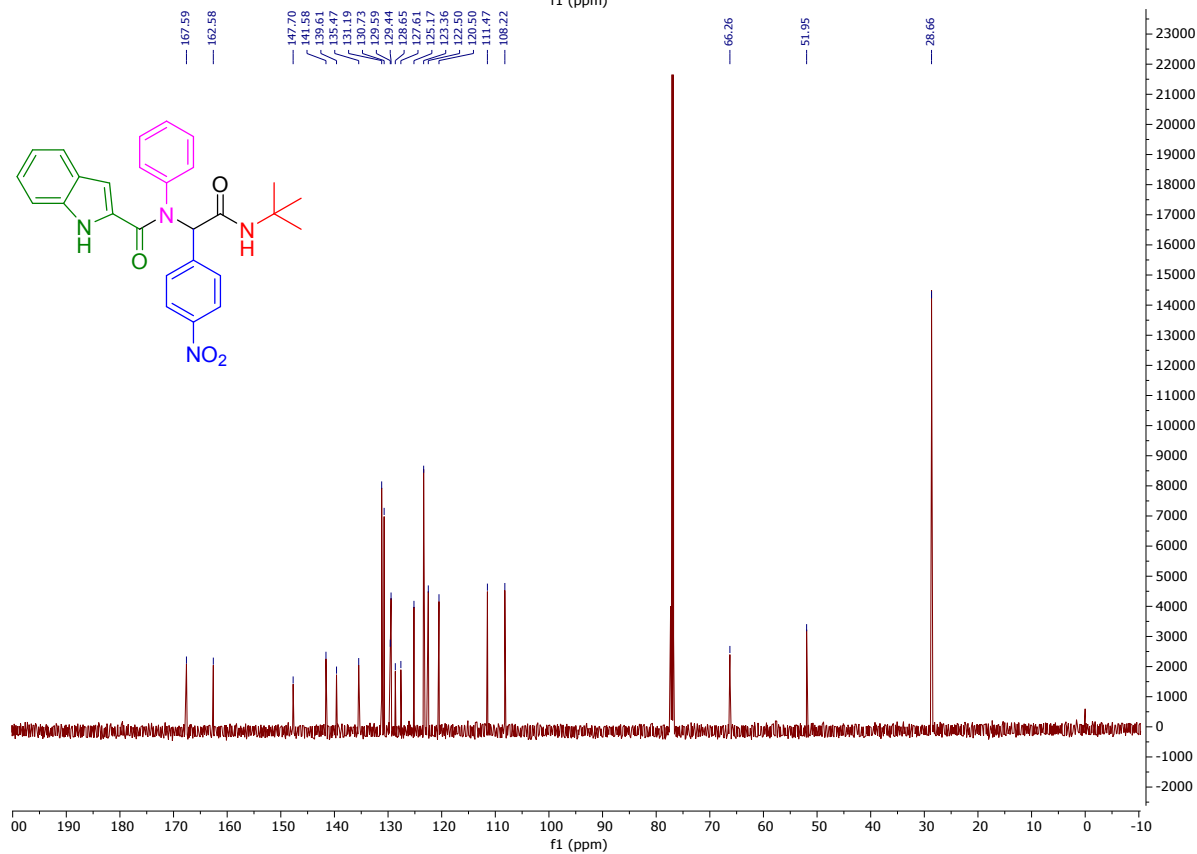

**5i: N-(1-(*tert*-butylcarbamoyl)cyclopentyl)-N-phenyl-1*H*-indole-2-carboxamide**

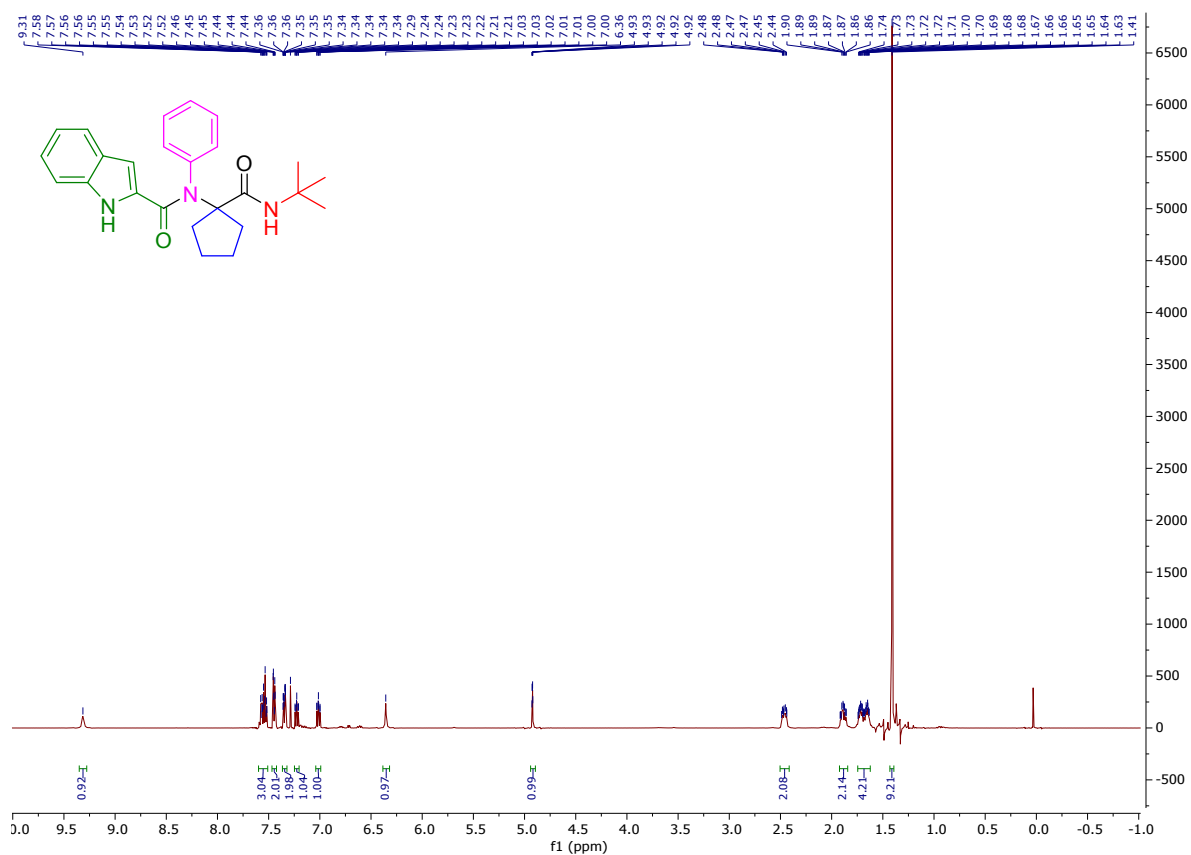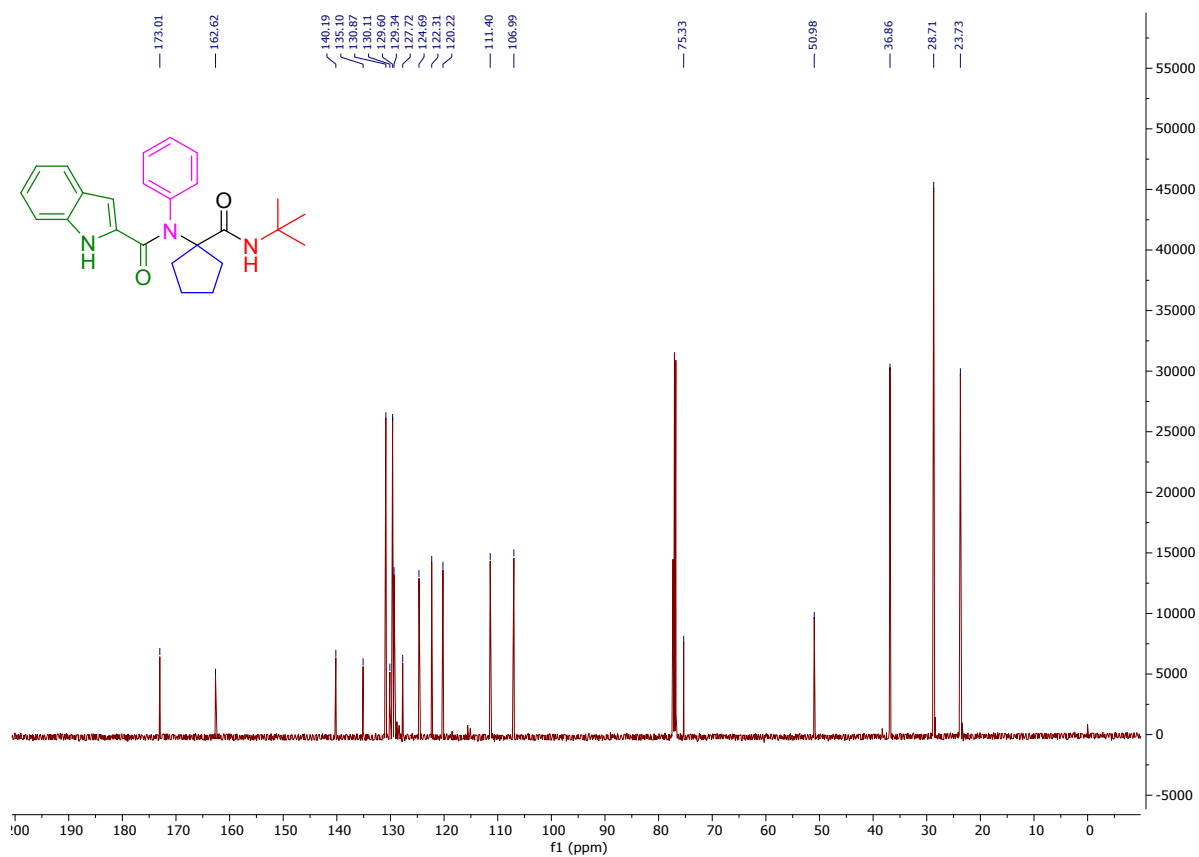

# 5j: 5-Chloro-N-(2-((4-methoxyphenethyl)amino)-2-oxoethyl)-N-phenyl-1H-indole-2-carboxamide

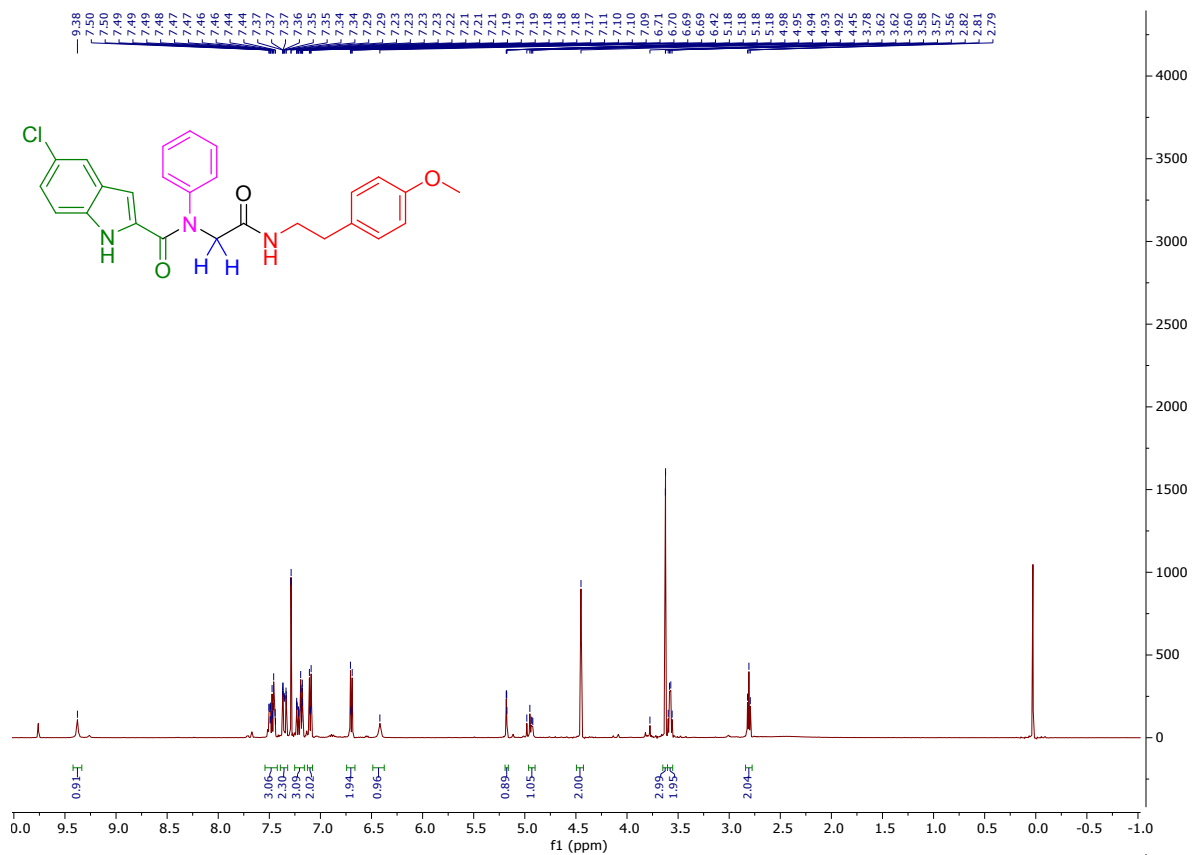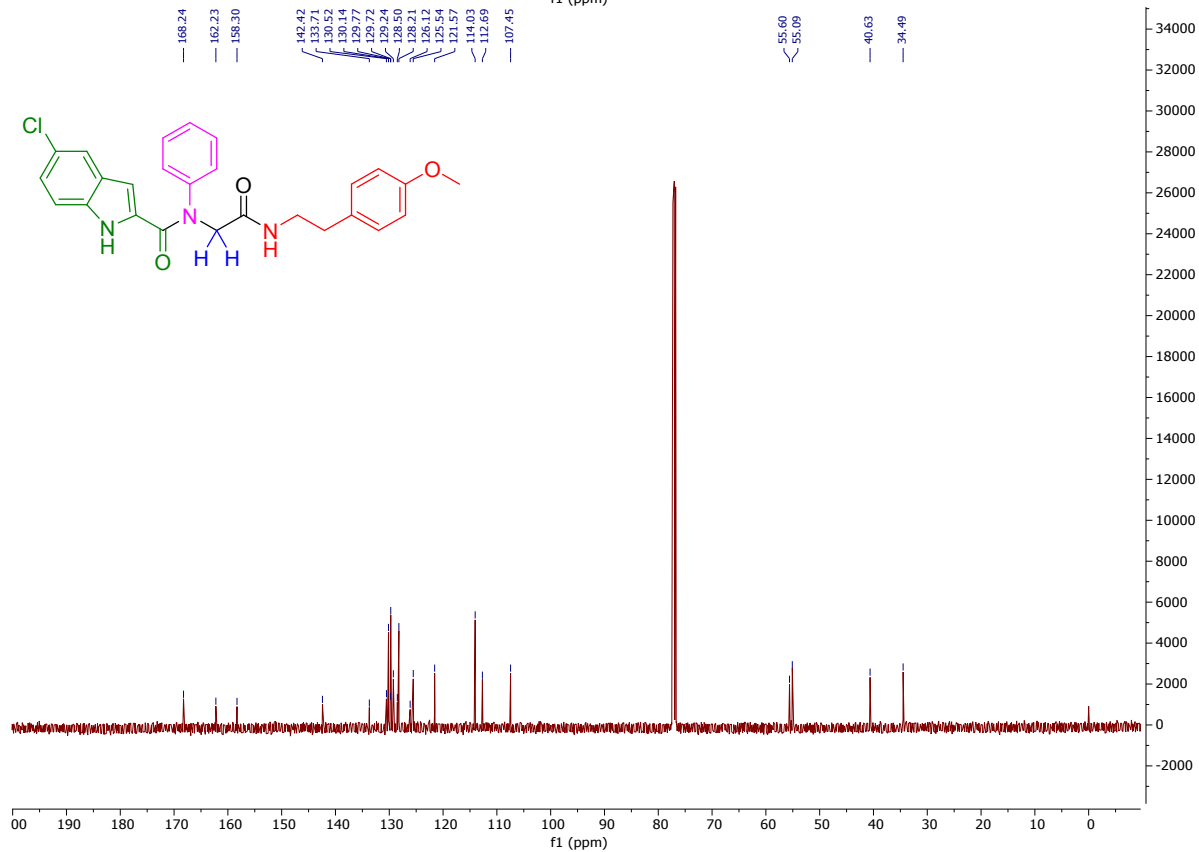



**5l: N-(2-(*tert*-butylamino)-2-oxoethyl)-6-methoxy-*N*-(4-methoxyphenyl)-1*H*-indole-2-carboxamide**

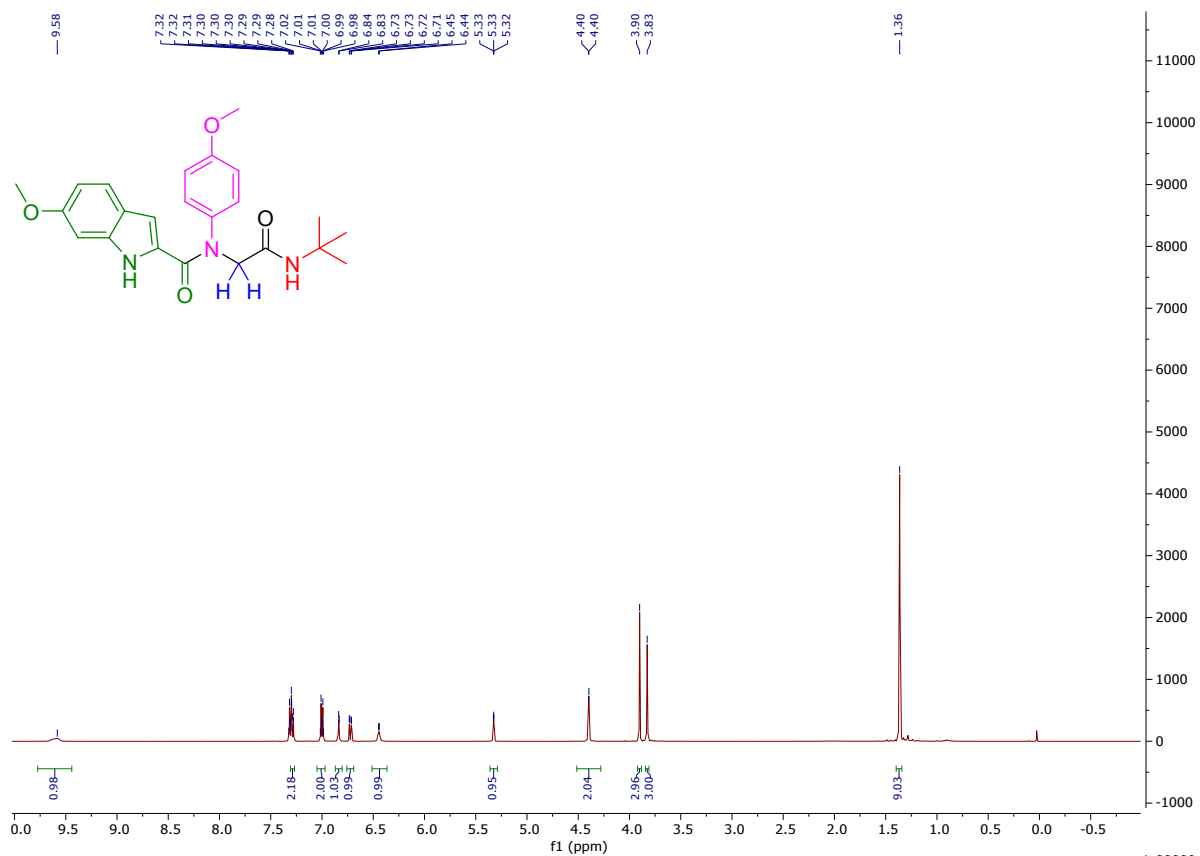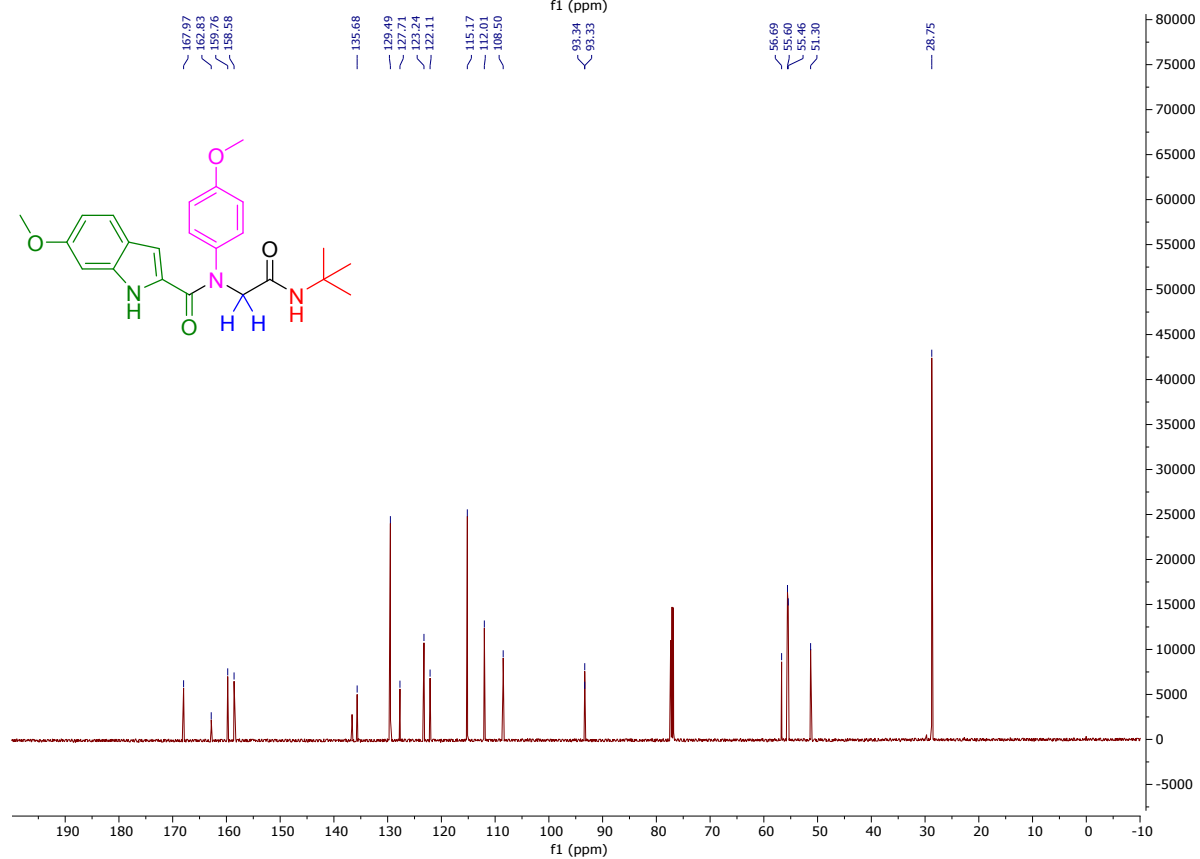

**5m: *N*-(2-(butylamino)-2-oxoethyl)-5-methoxy-*N*-(*p*-tolyl)-1*H*-indole-2-carboxamide**

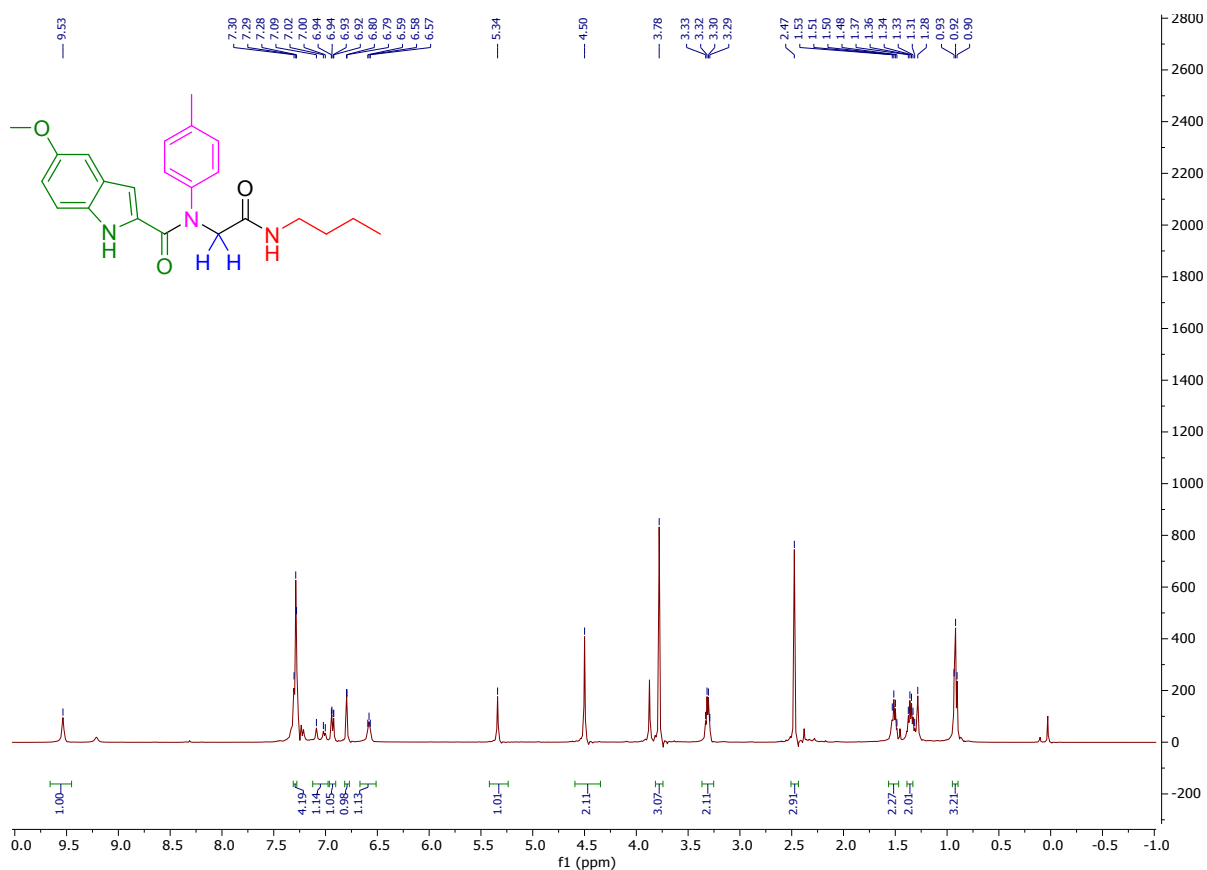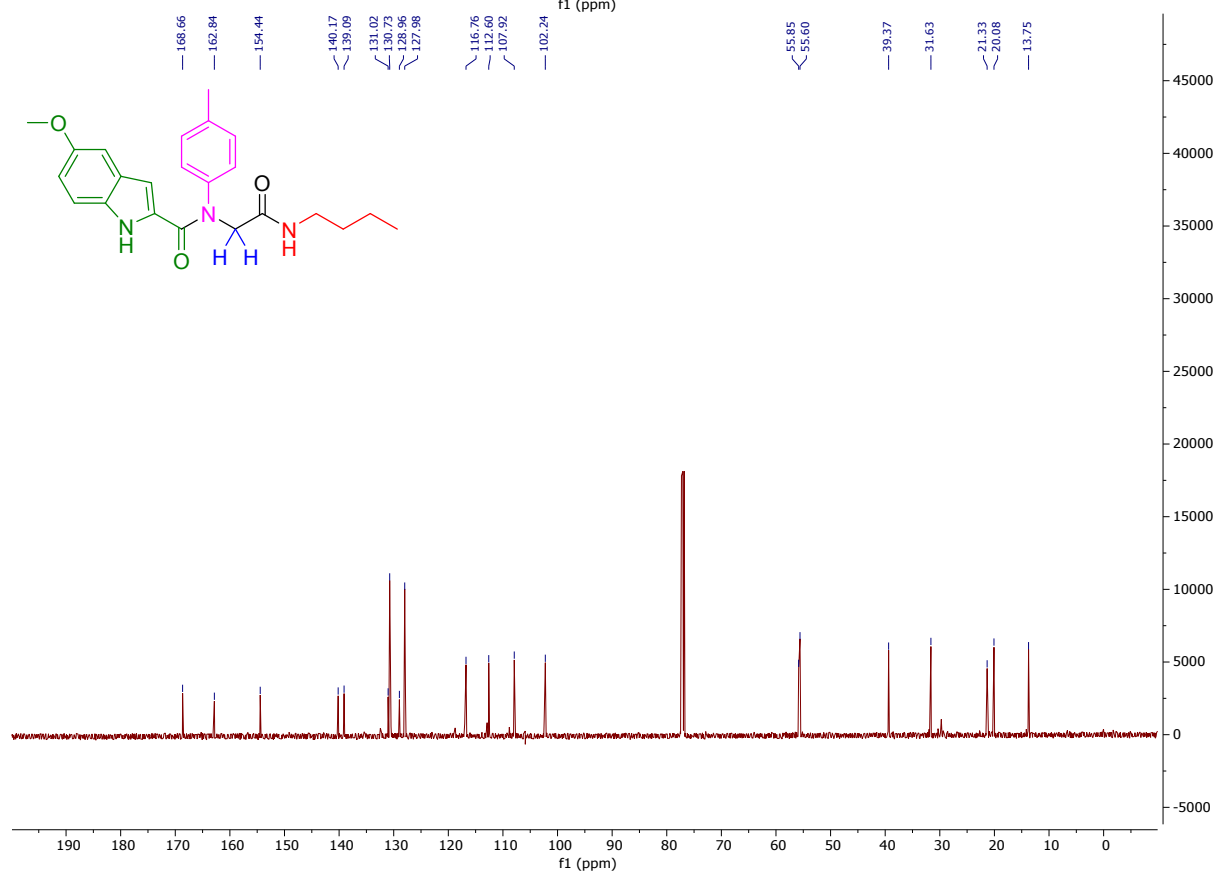

**5n: *N*-(2-(cyclohexylamino)-2-oxoethyl)-6-methoxy-*N*-phenyl-1*H*-indole-2-carboxamide**

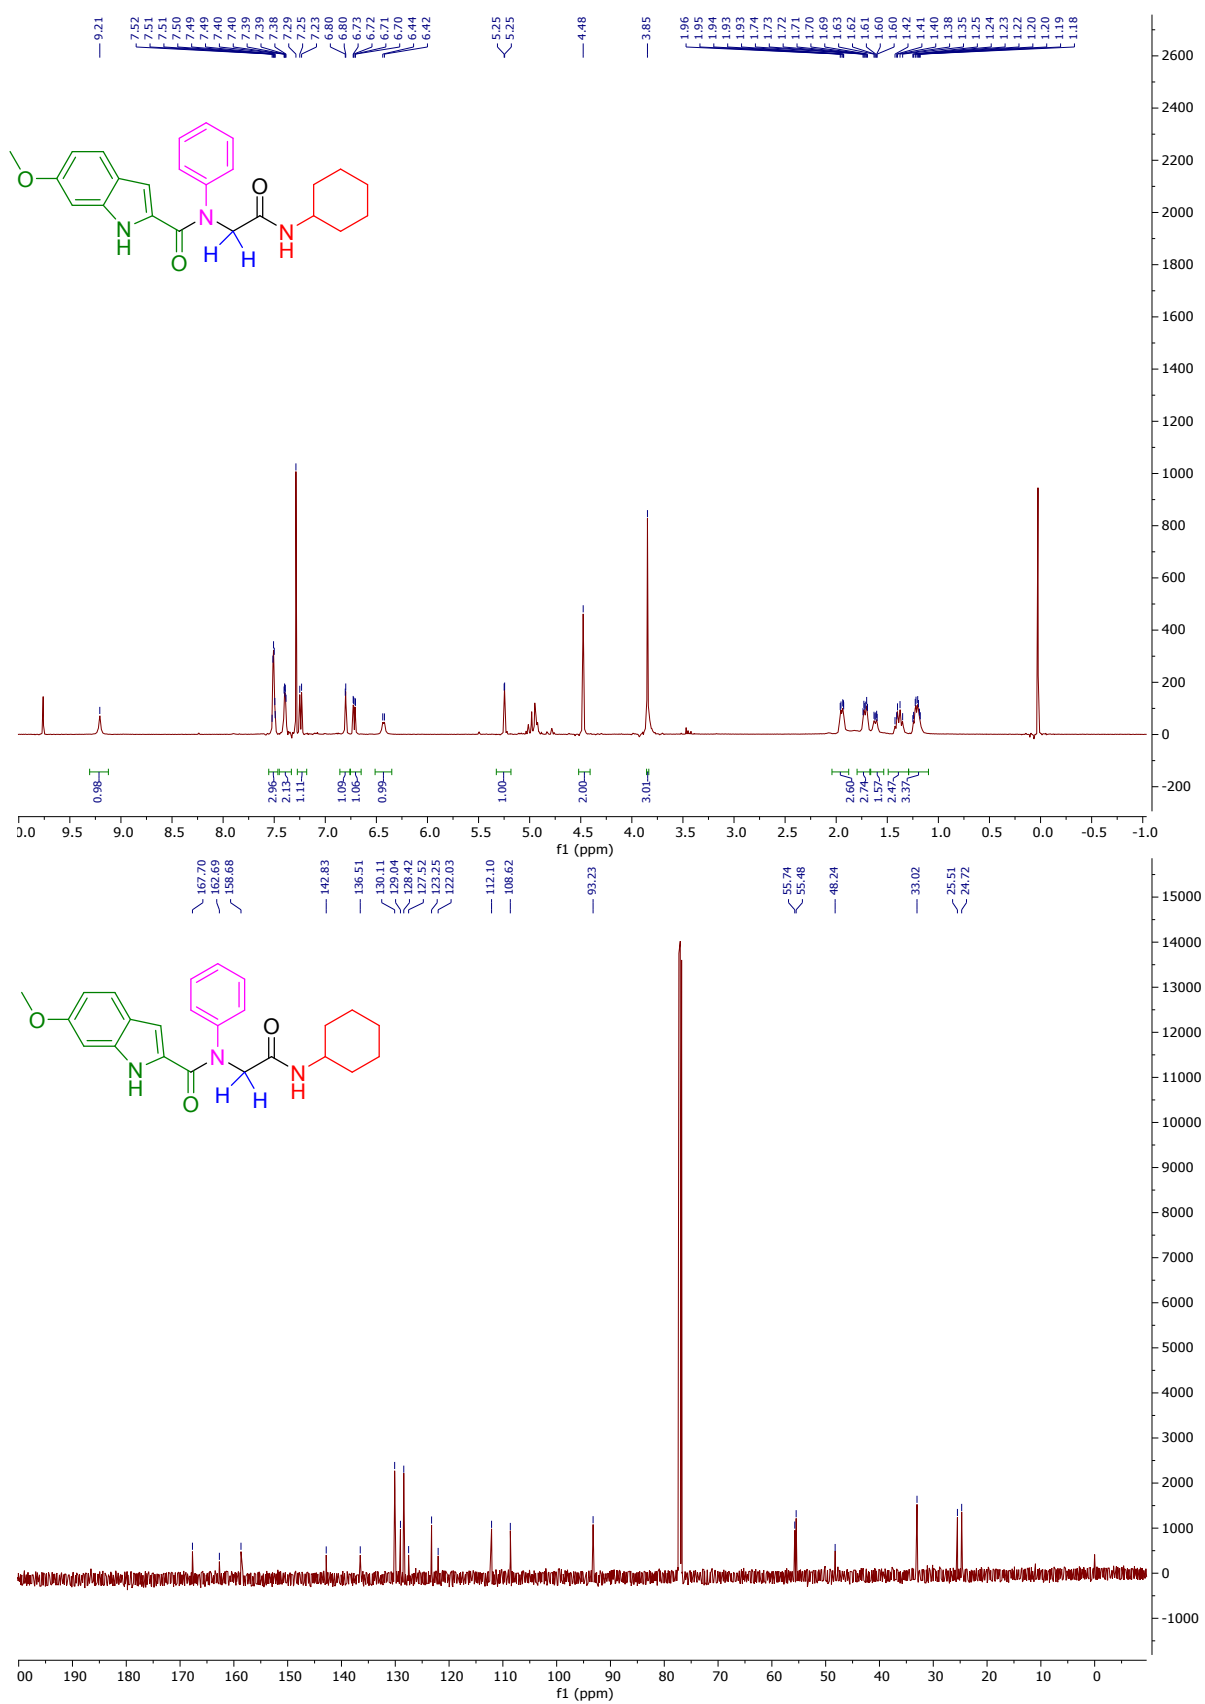



**5o: *N*-(2-((2,3-dimethoxybenzyl)amino)-2-oxoethyl)-6-methoxy-*N*-(*p*-tolyl)-1*H*-indole-2-carboxamide**

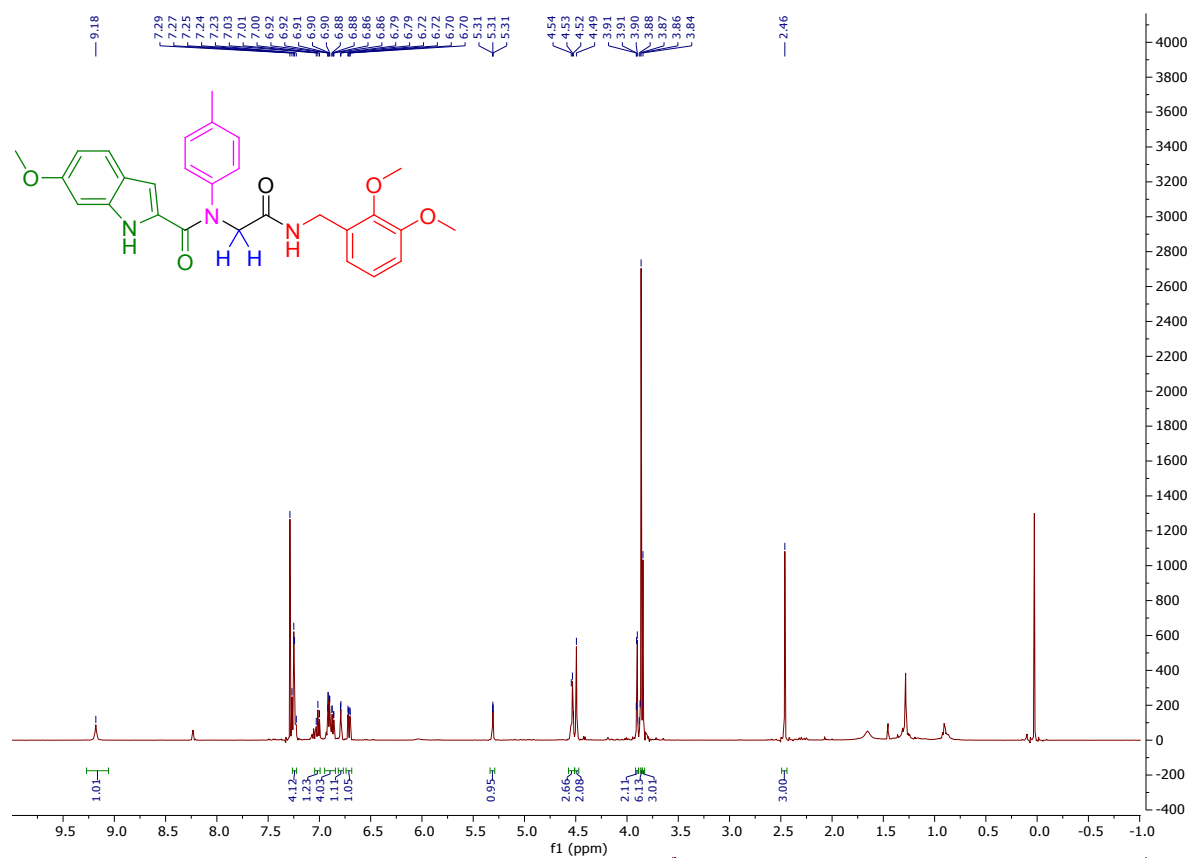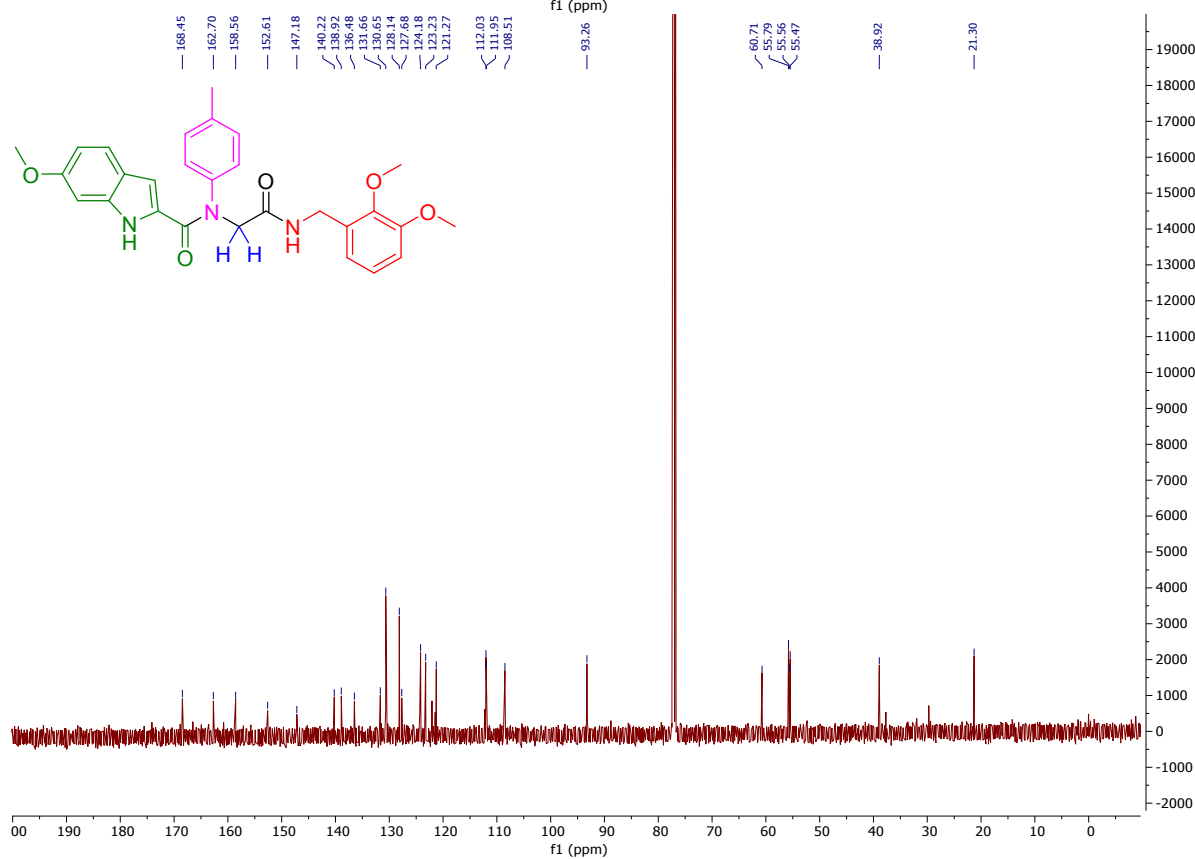

**5p: 5-Chloro-N-(2-((1-(4-methoxyphenyl)ethyl)amino)-2-oxoethyl)-N-phenyl-1H-indole-2-carboxamide**

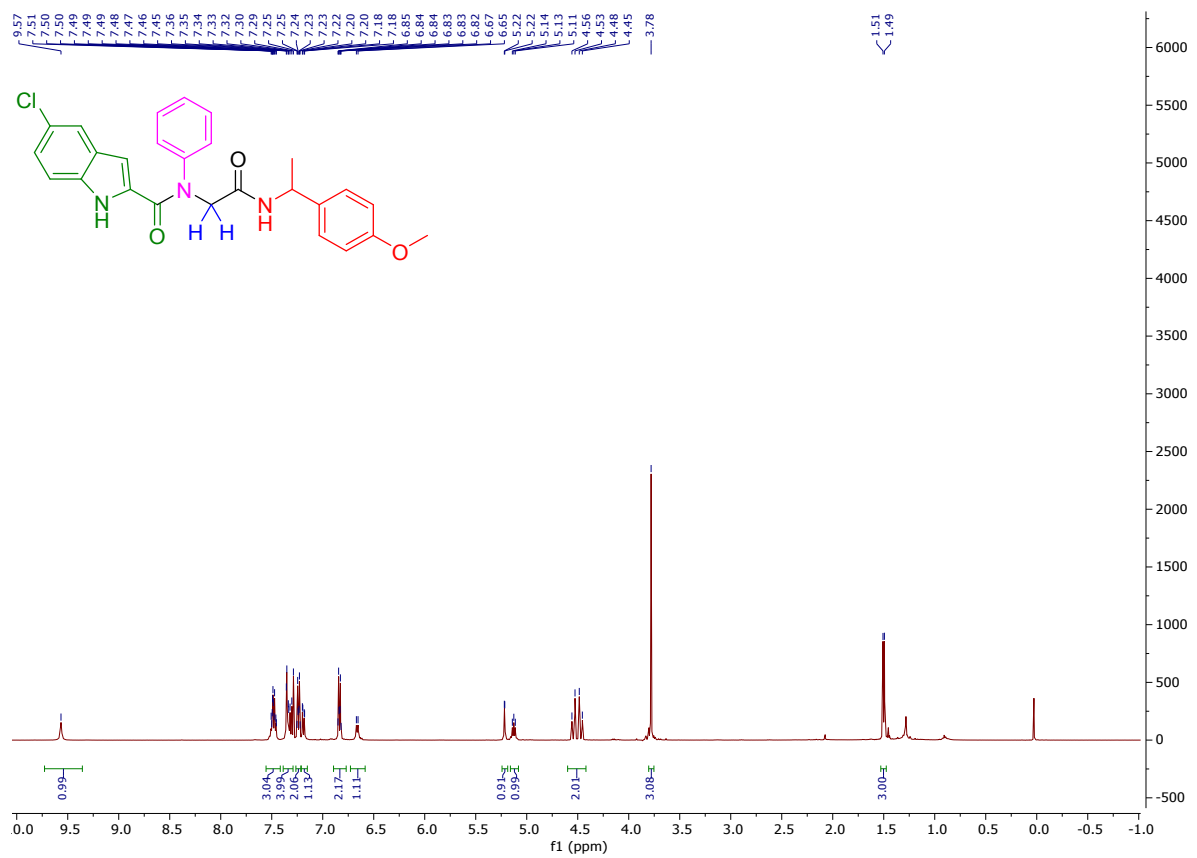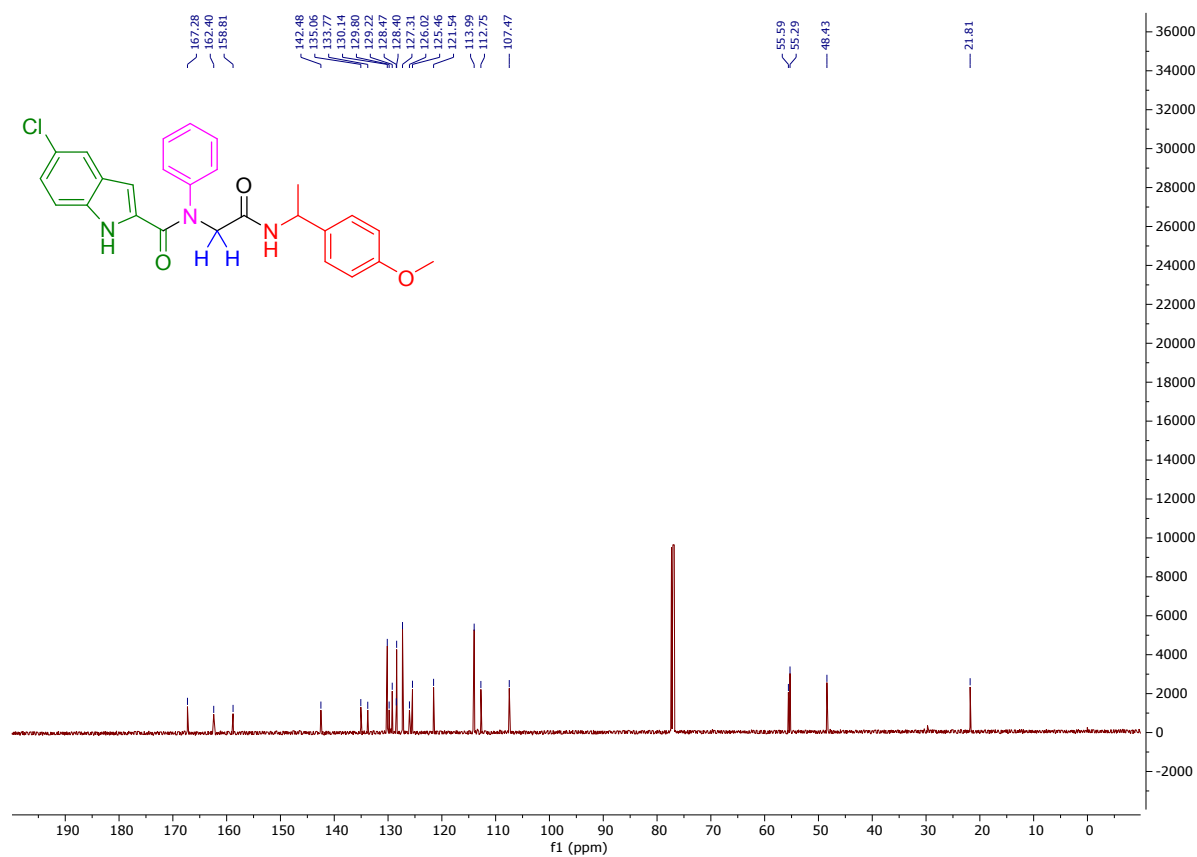

**5q: *N*-(2-oxo-2-((2,4,4-trimethylpentan-2-yl)amino)ethyl)-*N*-(*o*-tolyl)-1*H*-indole-2-carboxamide**

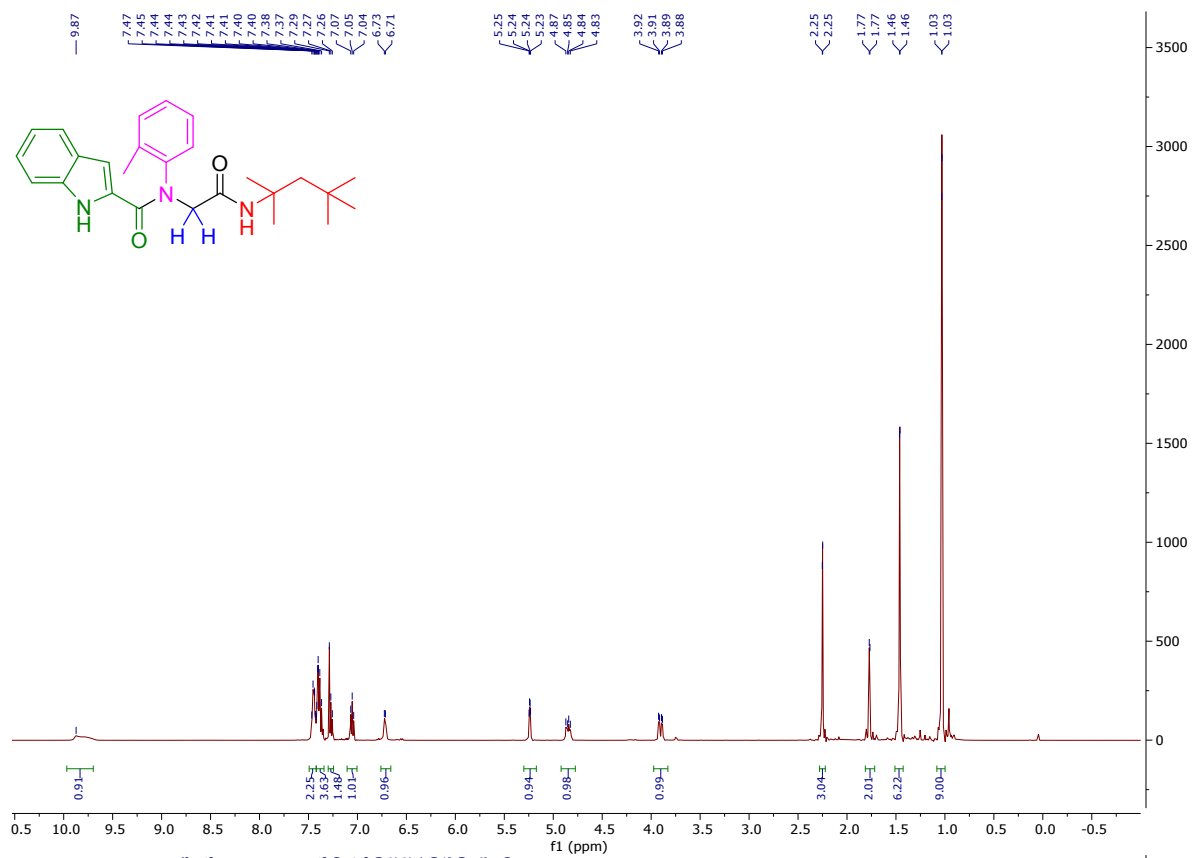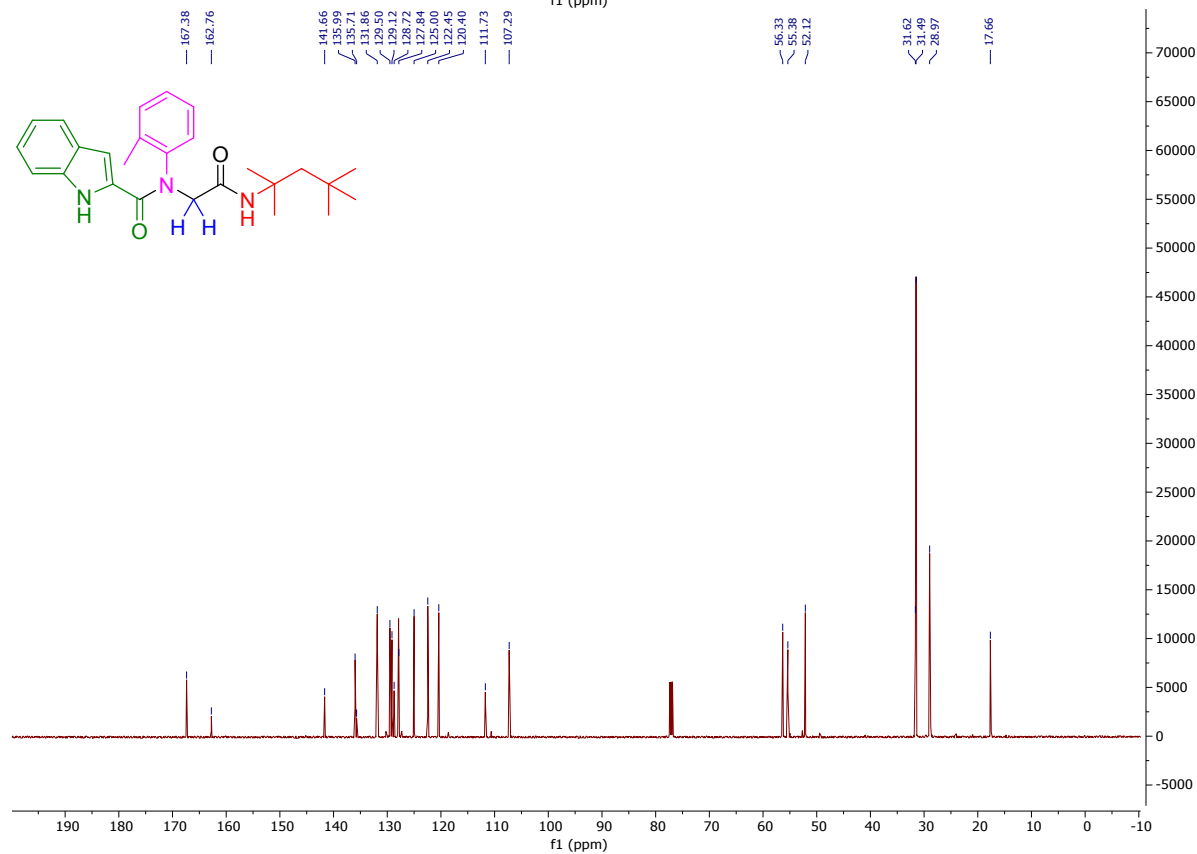

**5r: *N*-(2-(*tert*-butylamino)-2-oxoethyl)-1-methyl-*N*-phenyl-1*H*-indole-2-carboxamide**

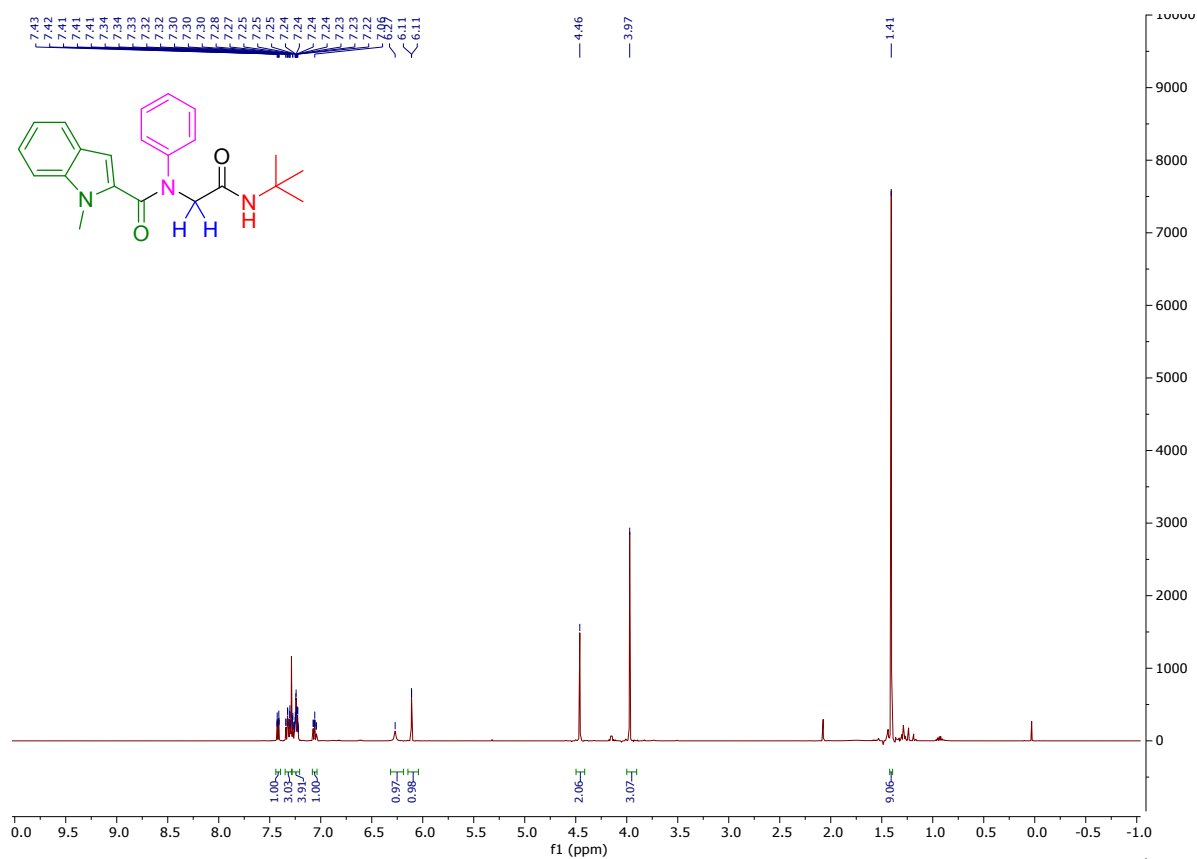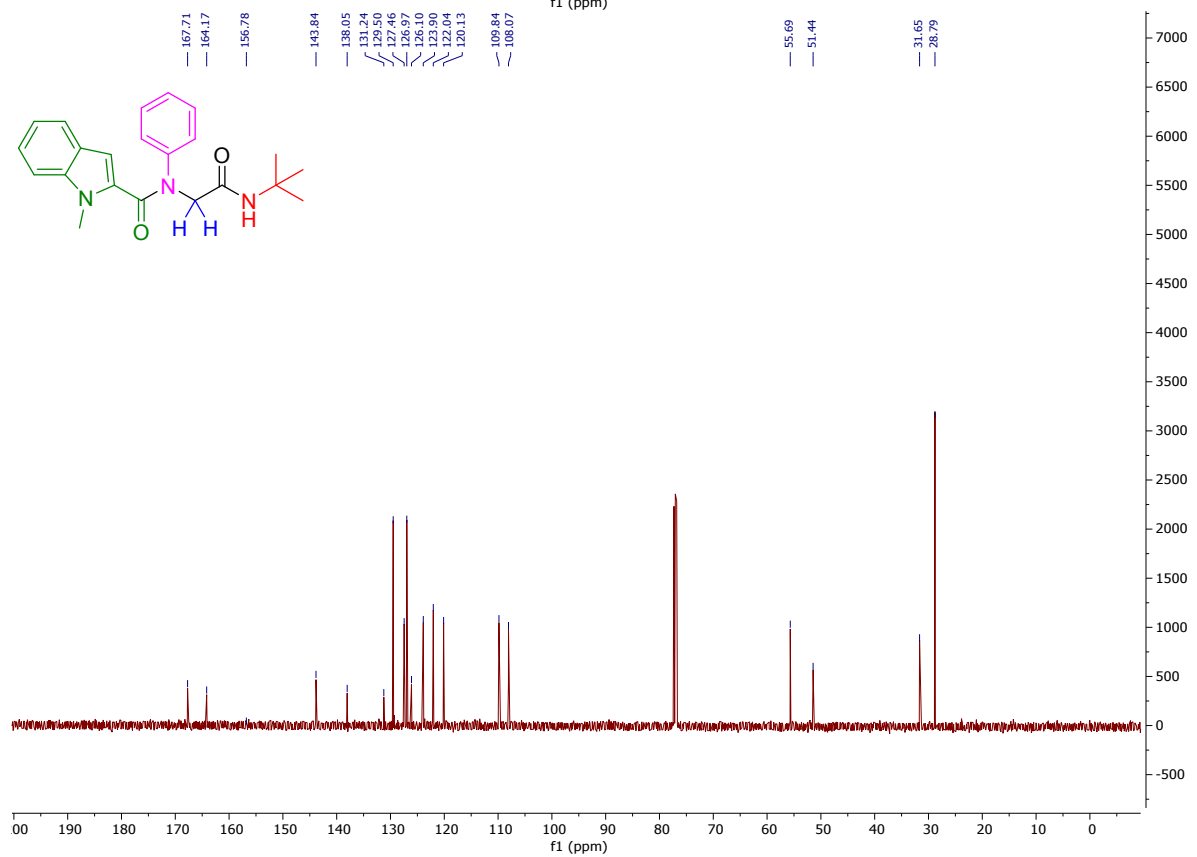

**6a: *N*-(*tert*-butyl)-2-(6-oxo-6,11-dihydro-5*H*-indolo[3,2-*c*]quinolin-5-yl)acetamide**

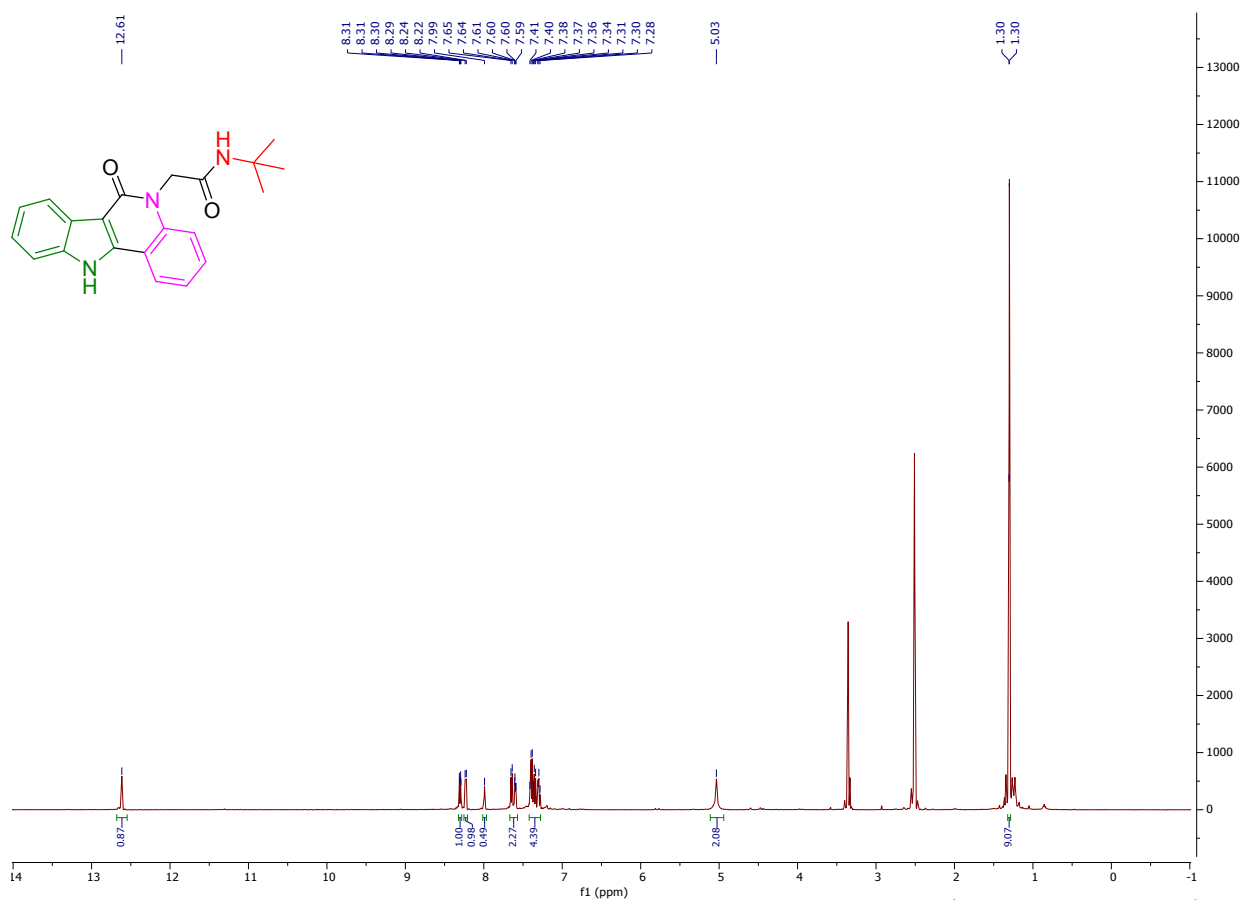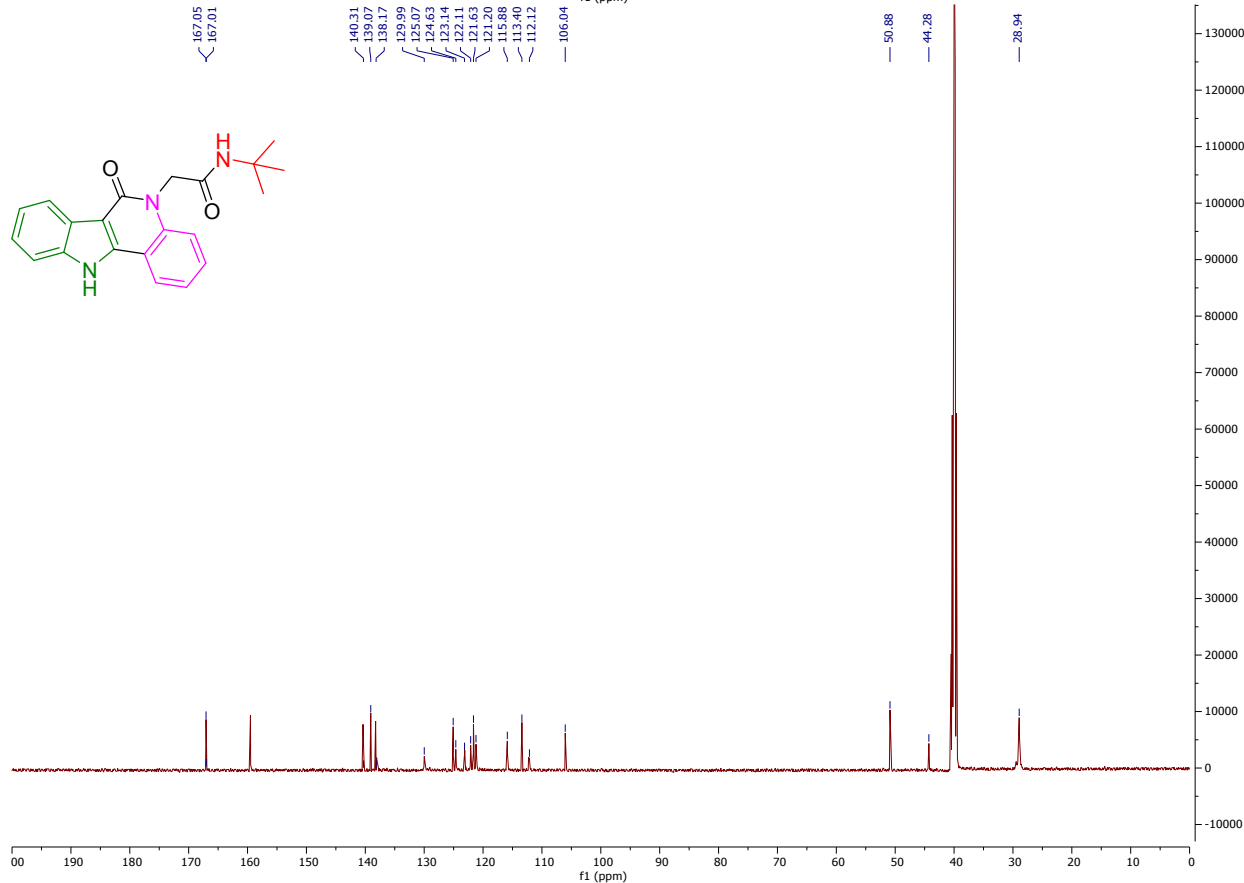

**6b: *N*-(*tert*-butyl)-2-(2-chloro-6-oxo-6,11-dihydro-5*H*-indolo[3,2-*c*]quinolin-5-yl)acetamide**

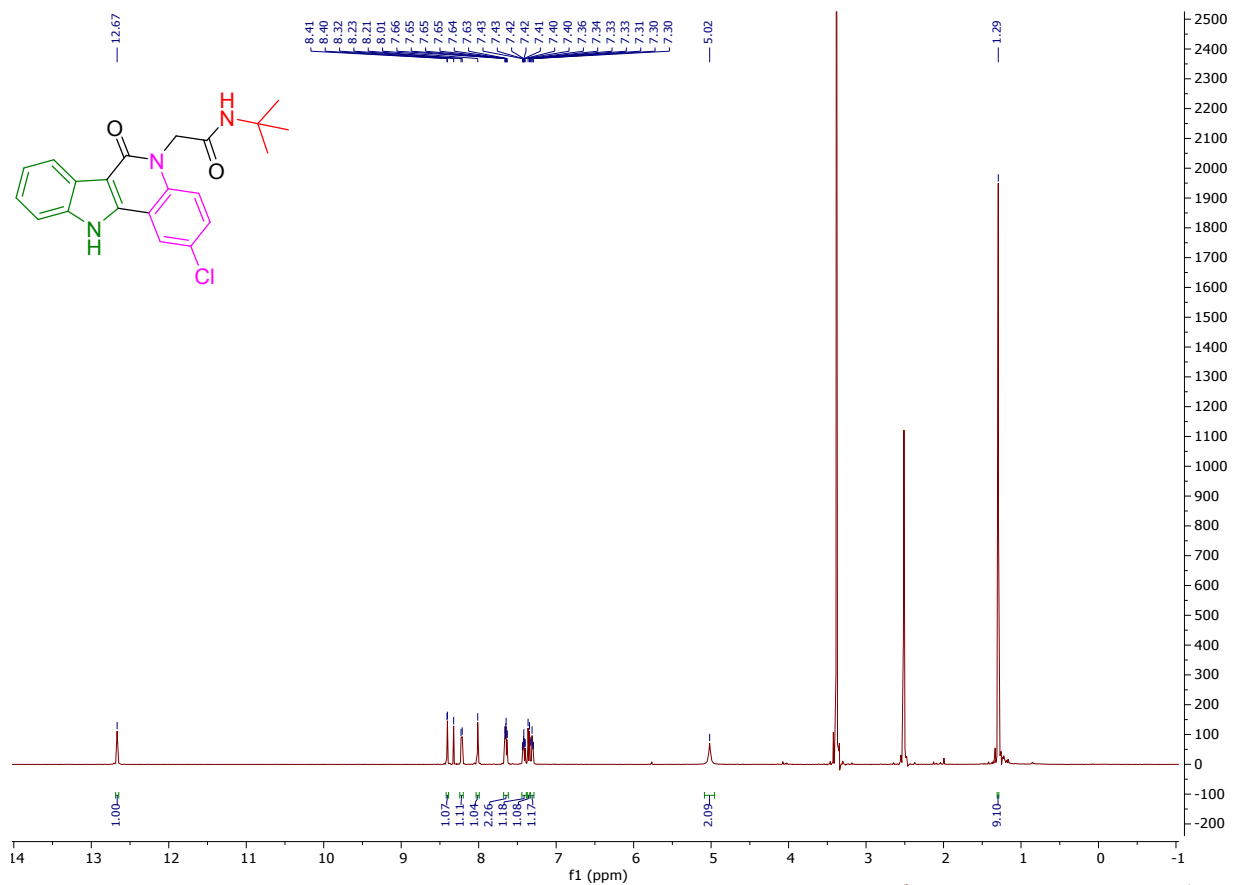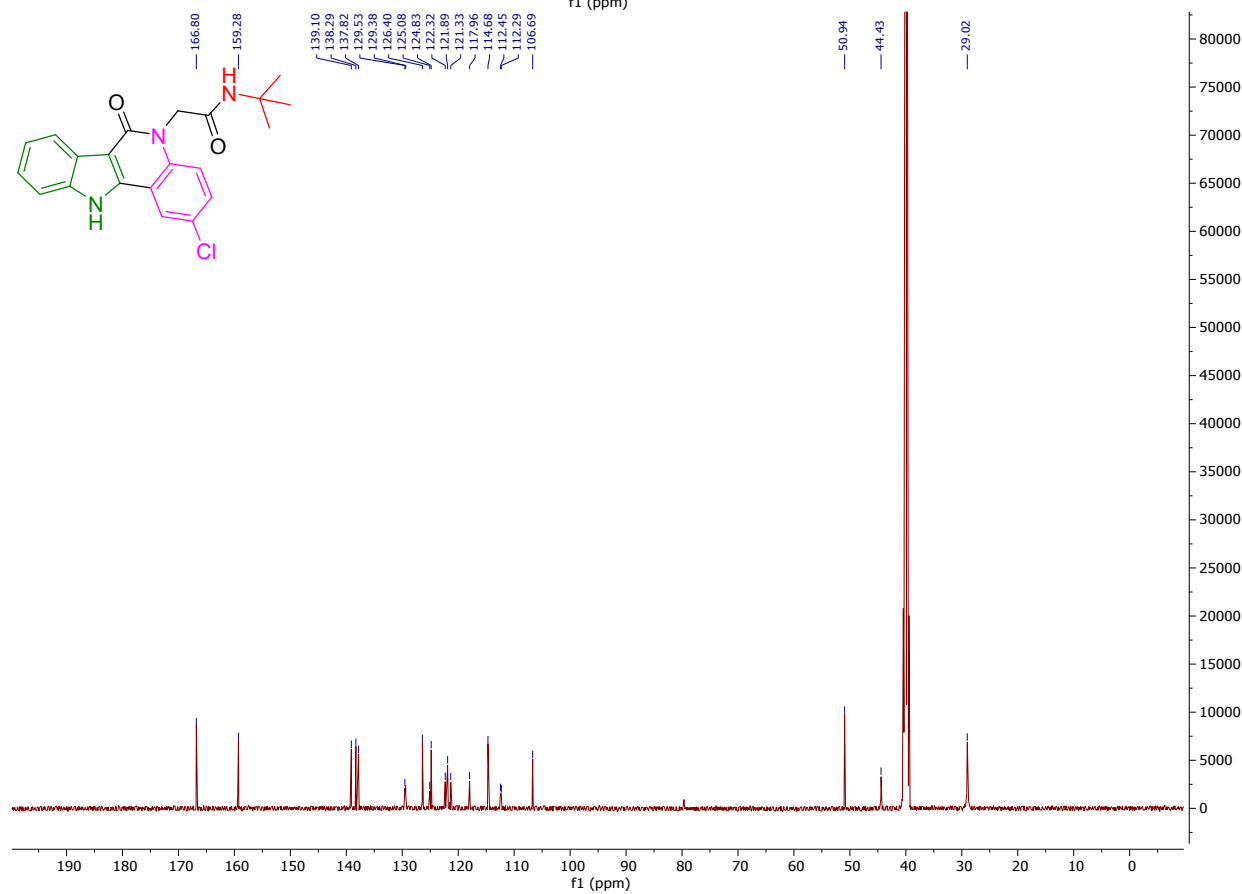

**6c: *N*-(*tert*-butyl)-2-(2-methyl-6-oxo-6,11-dihydro-5*H*-indolo[3,2-*c*]quinolin-5-yl)acetamide**

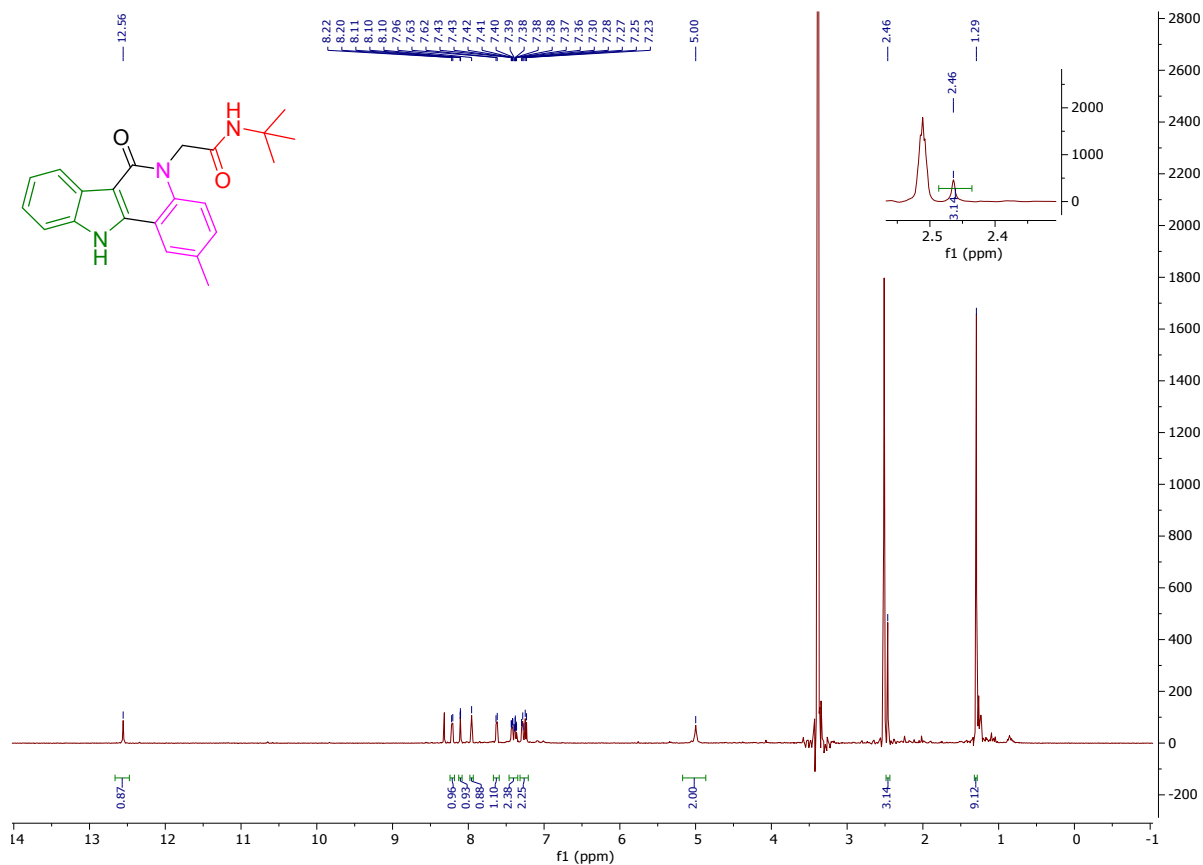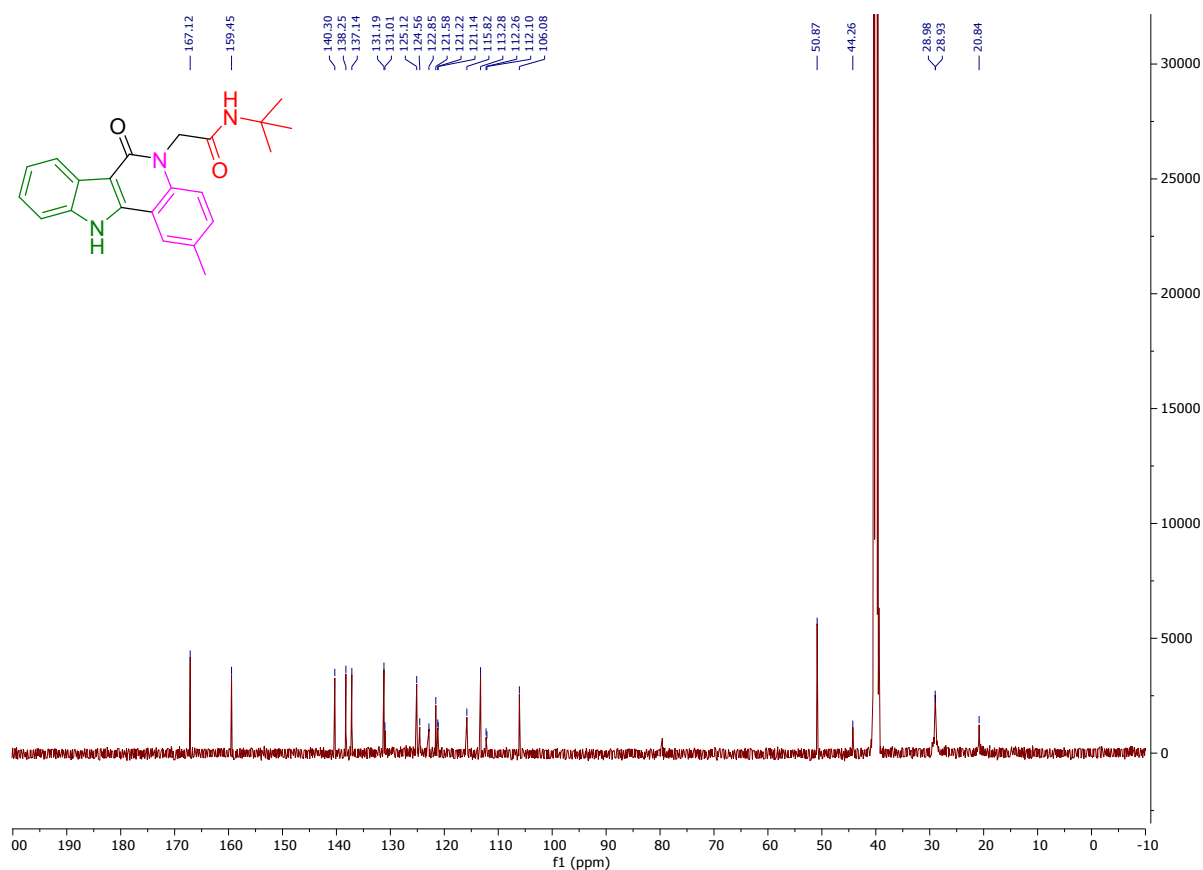

**6d: *N*-(*tert*-butyl)-2-(6-oxo-6,11-dihydro-5*H*-indolo[3,2-*c*]quinolin-5-yl)-2-phenylacetamide**

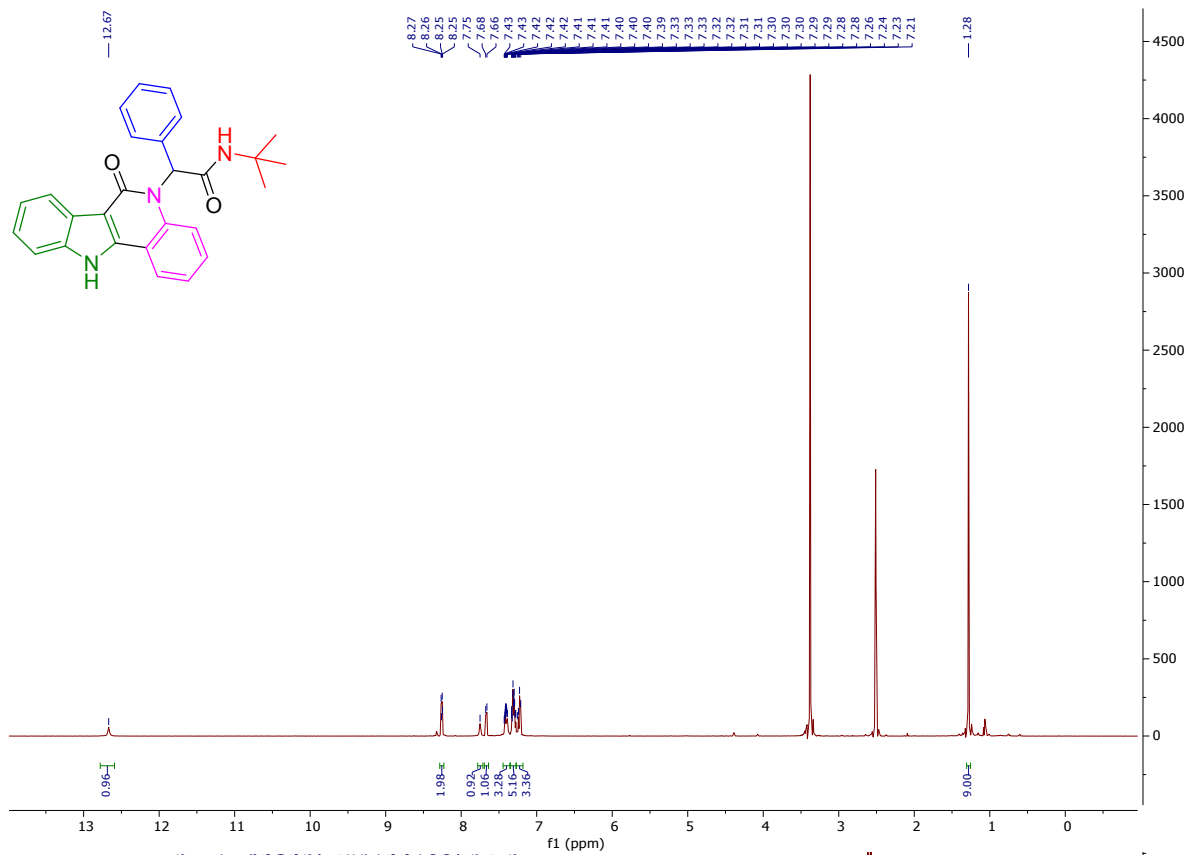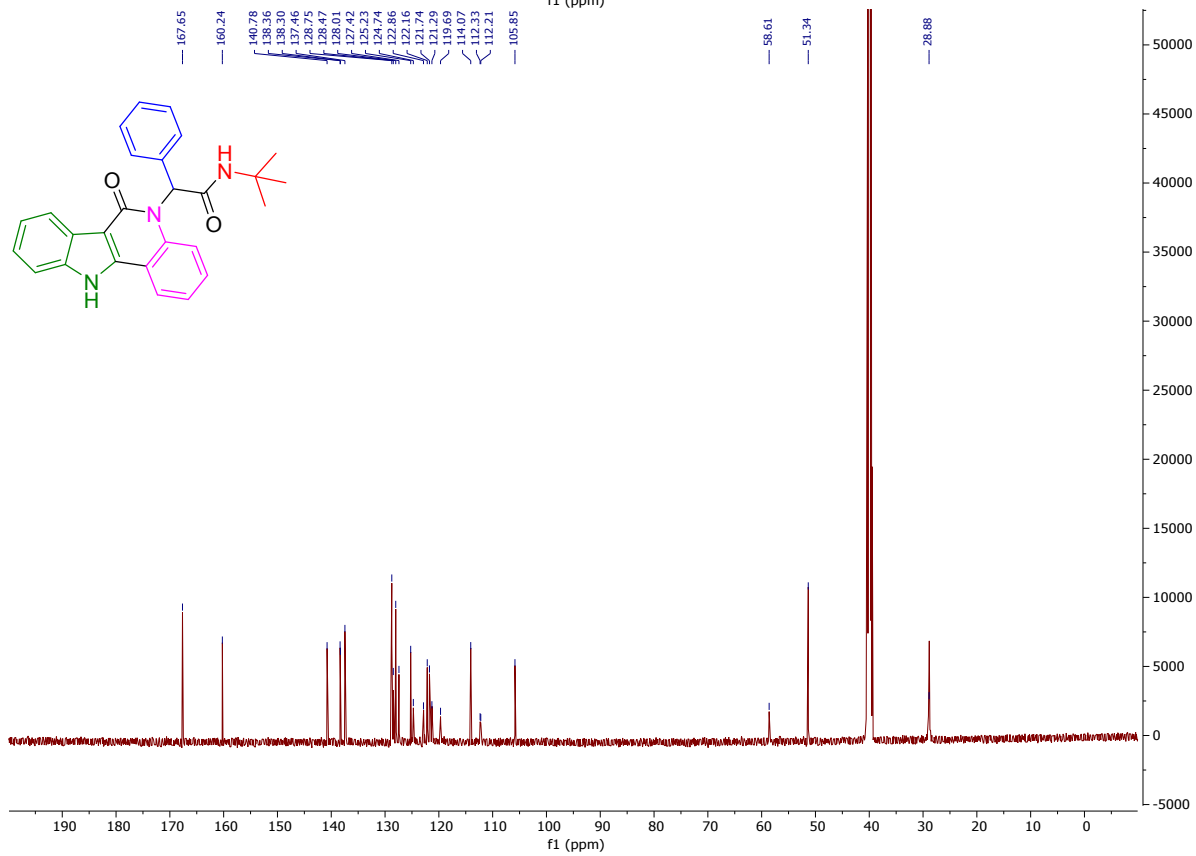



**6e: *N*-(2-(*tert*-butylamino)-2-oxoethyl)-*N*-(4-phenoxyphenyl)-1*H*-indole-2-carboxamide**

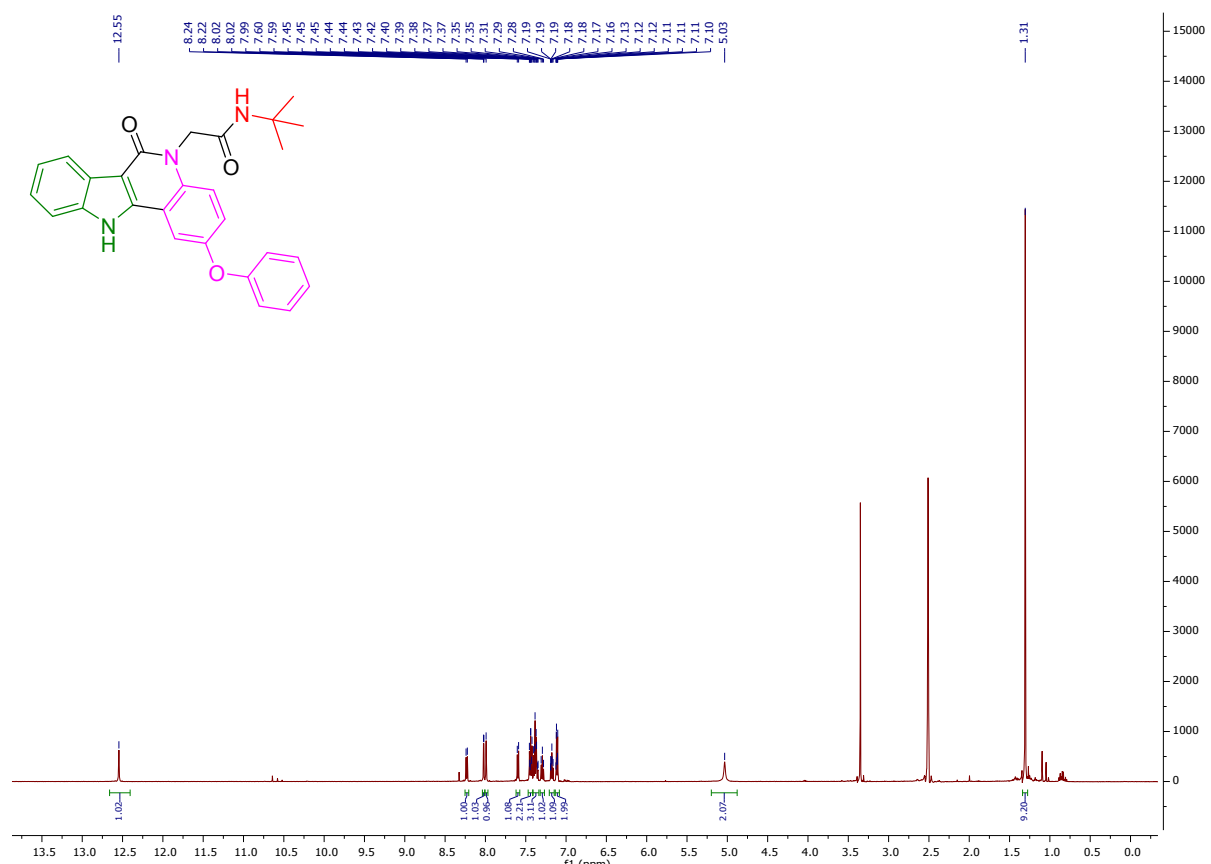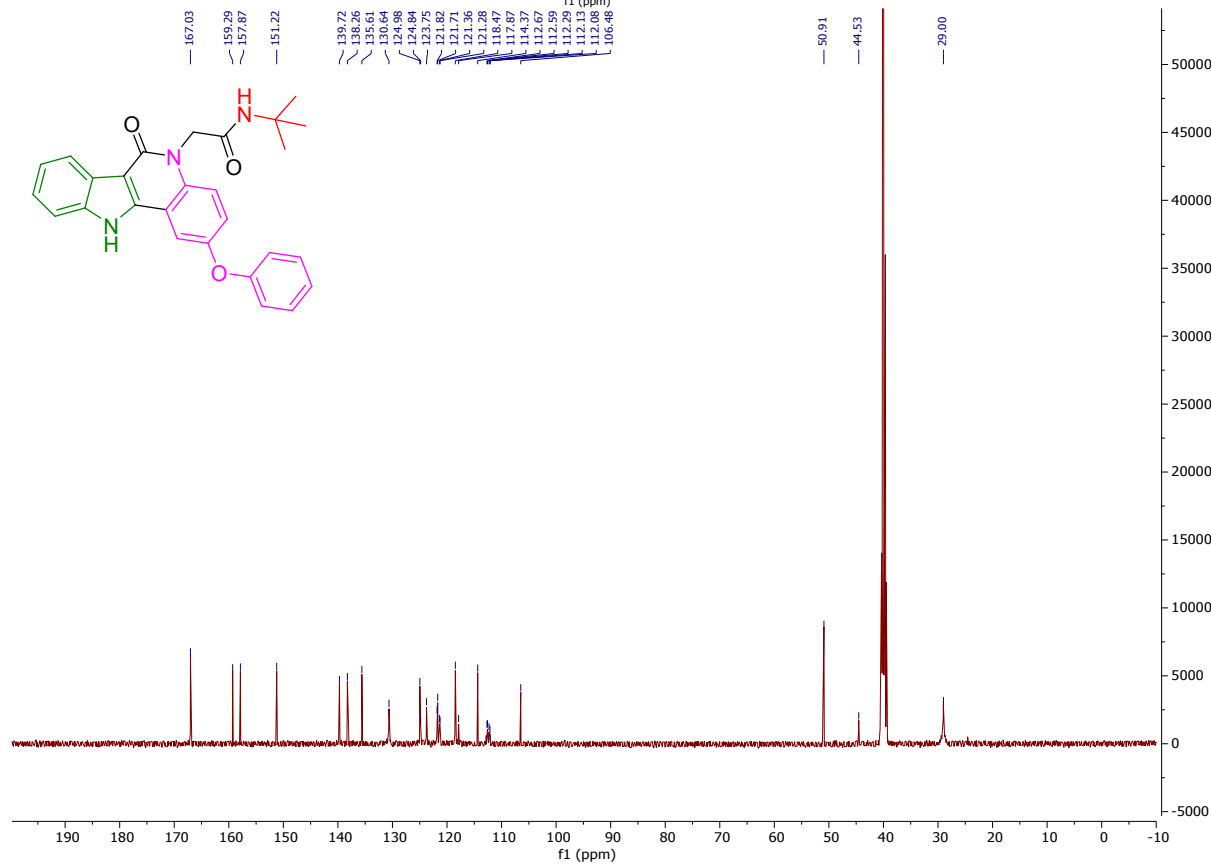

**6f: *N*-(*tert*-butyl)-2-(1,3-dimethyl-6-oxo-6,11-dihydro-5*H*-indolo[3,2-*c*]quinolin-5-yl)acetamide**

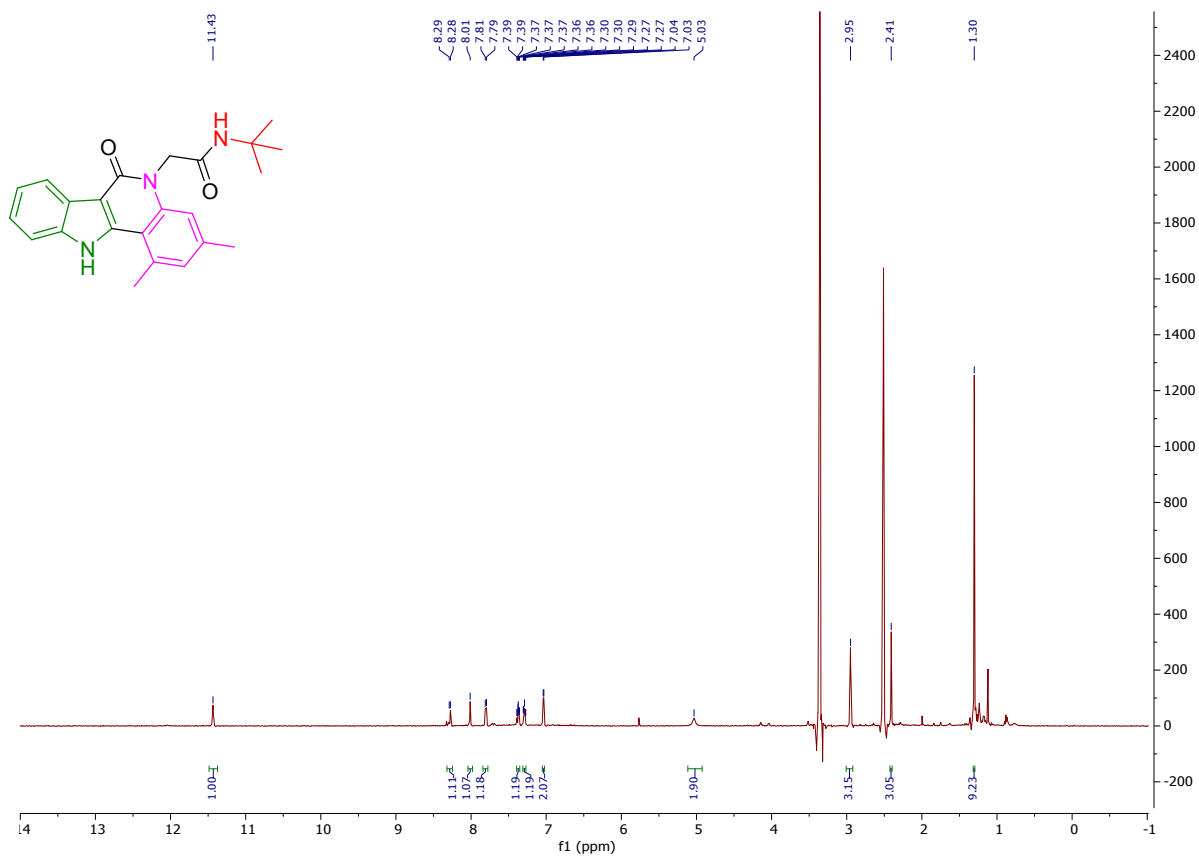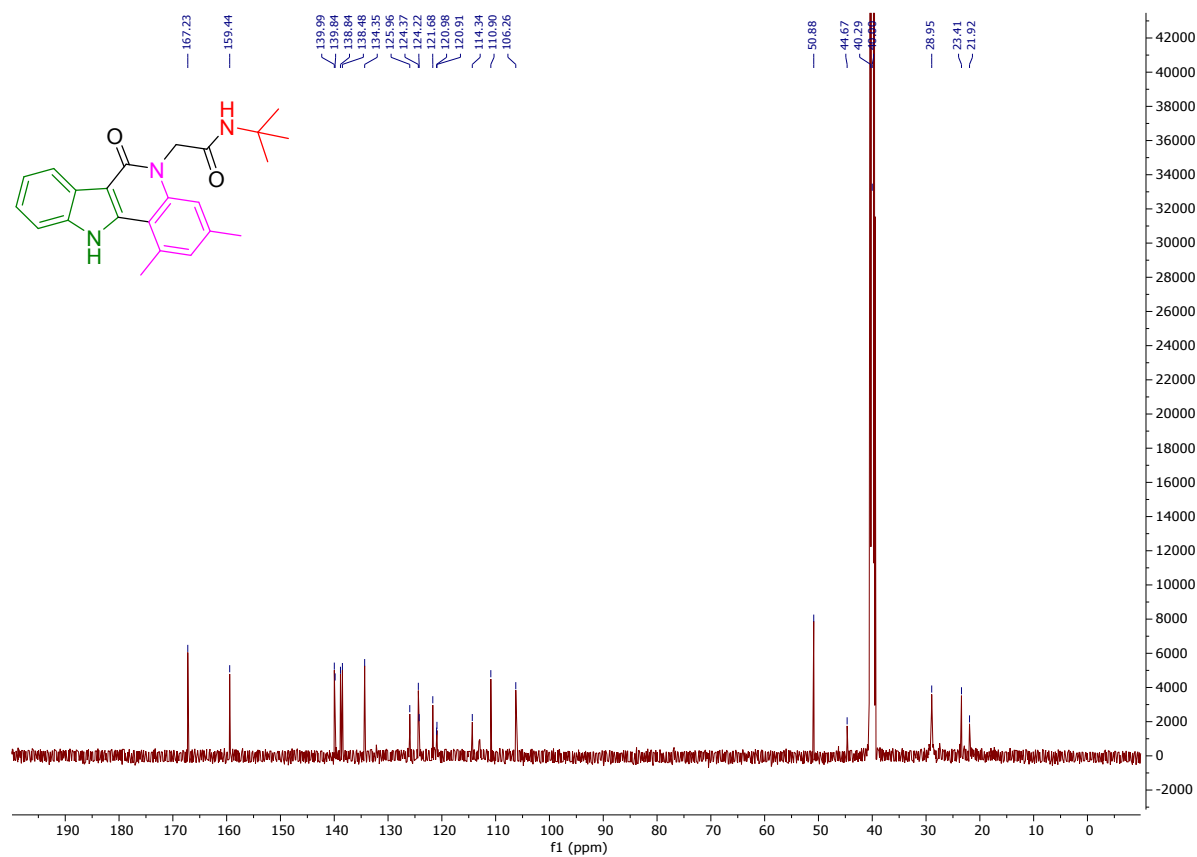

**6g: *N*-(*tert*-butyl)-2-(2-fluoro-6-oxo-6,11-dihydro-5*H*-indolo[3,2-*c*]quinolin-5-yl)acetamide**

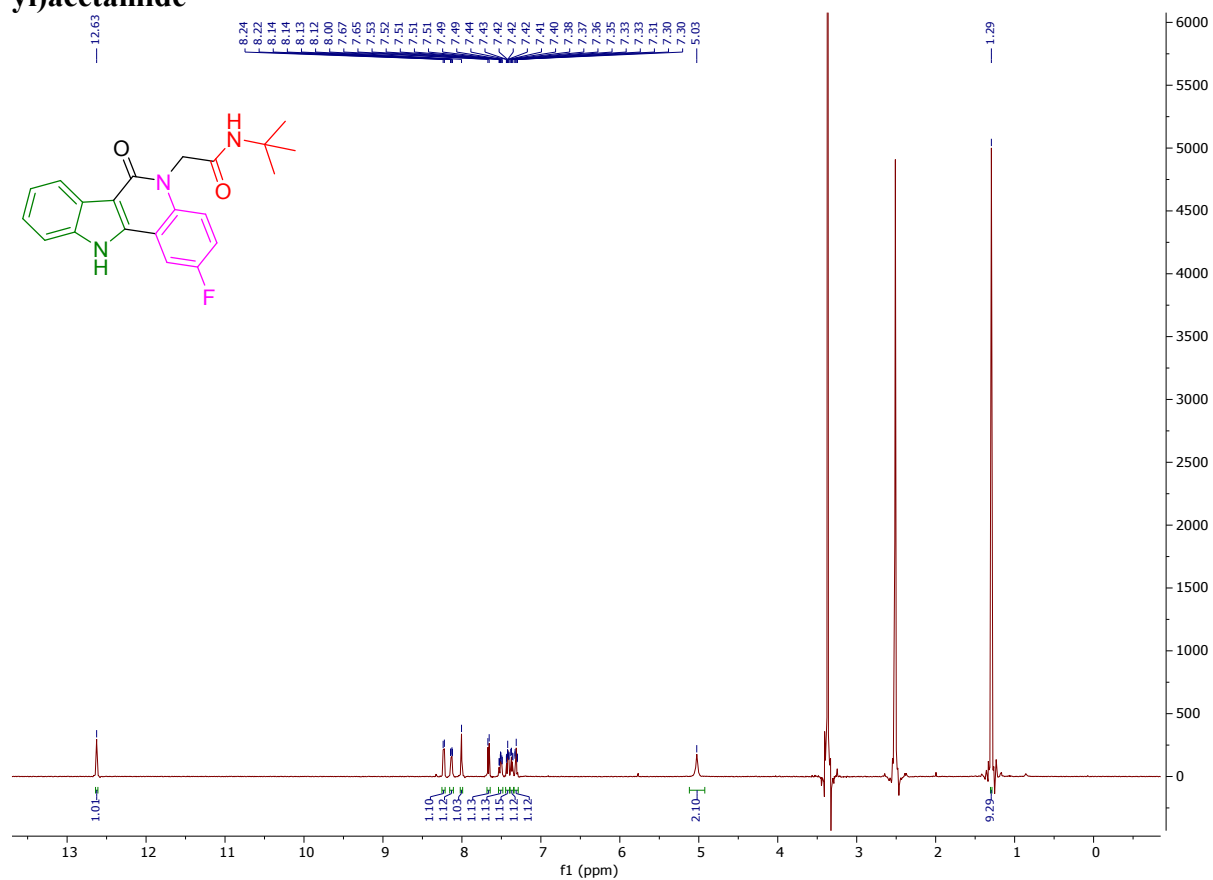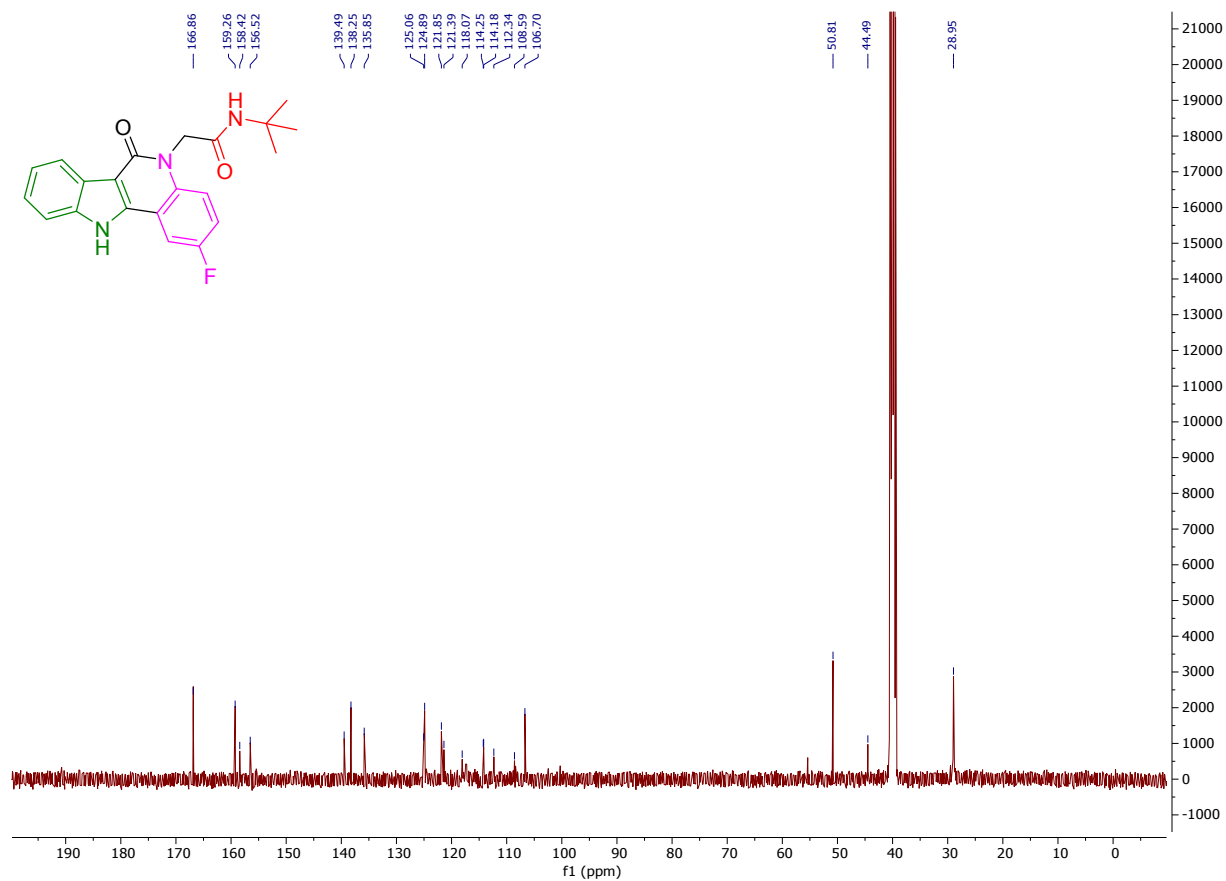

**6h: *N*-(*tert*-butyl)-2-(4-nitrophenyl)-2-(6-oxo-6,11-dihydro-5*H*-indolo[3,2-*c*]quinolin-5-yl)acetamide**

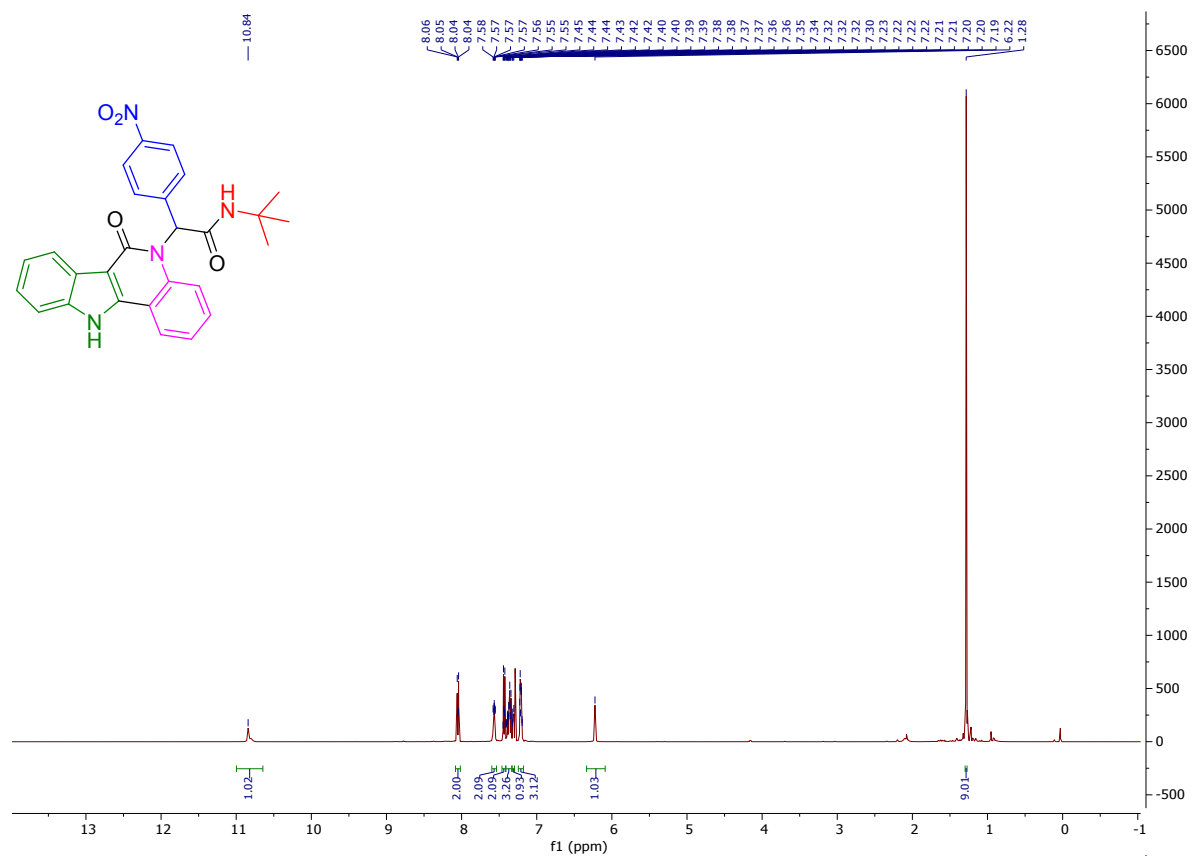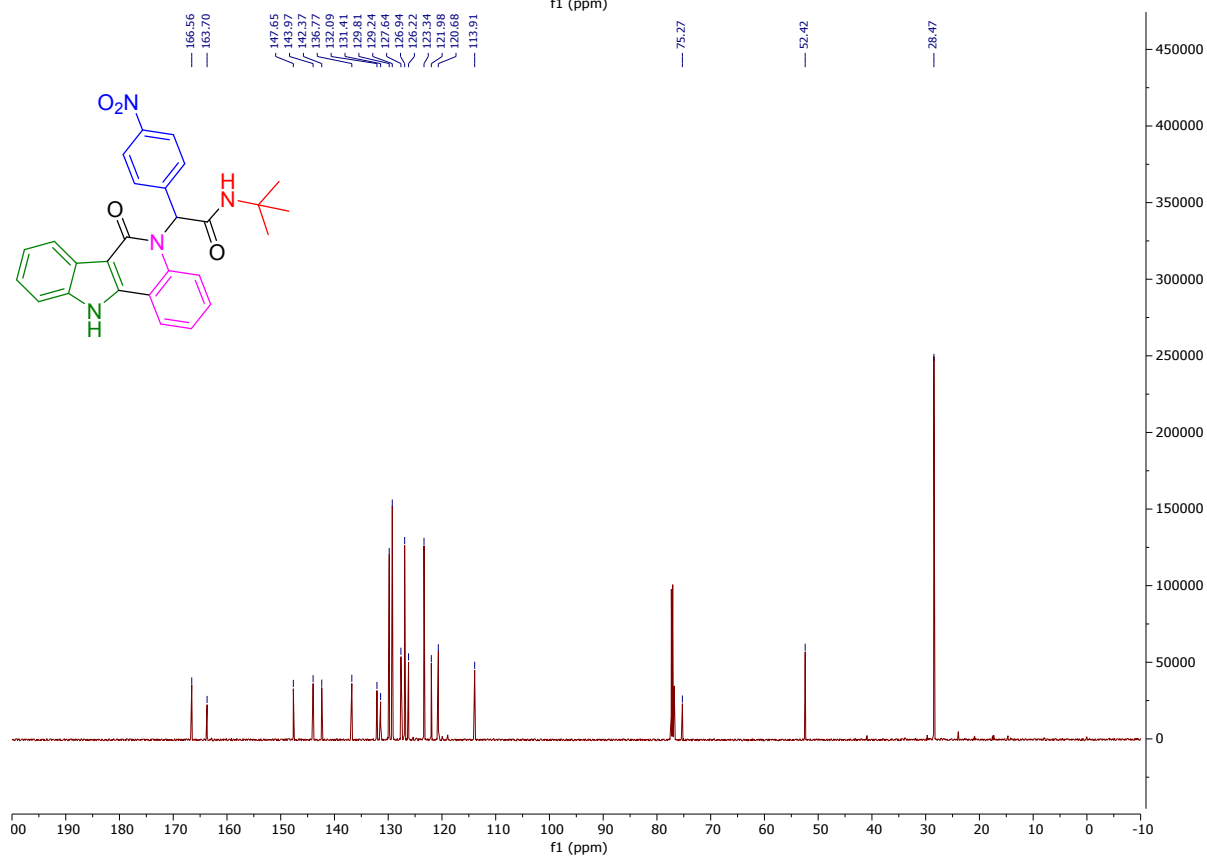

**6i: *N*-(*tert*-butyl)-2-(4-nitrophenyl)-2-(6-oxo-6,11-dihydro-5*H*-indolo[3,2-*c*]quinolin-5-yl)acetamide**

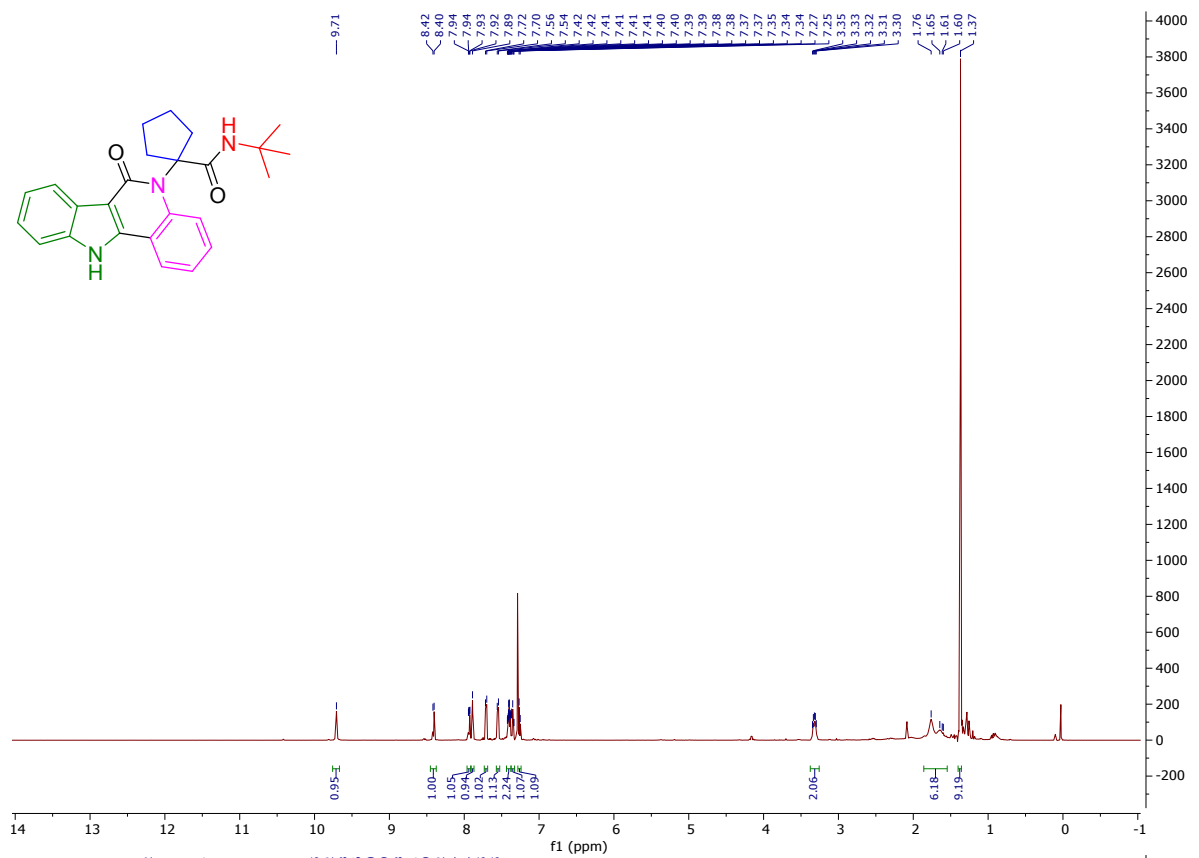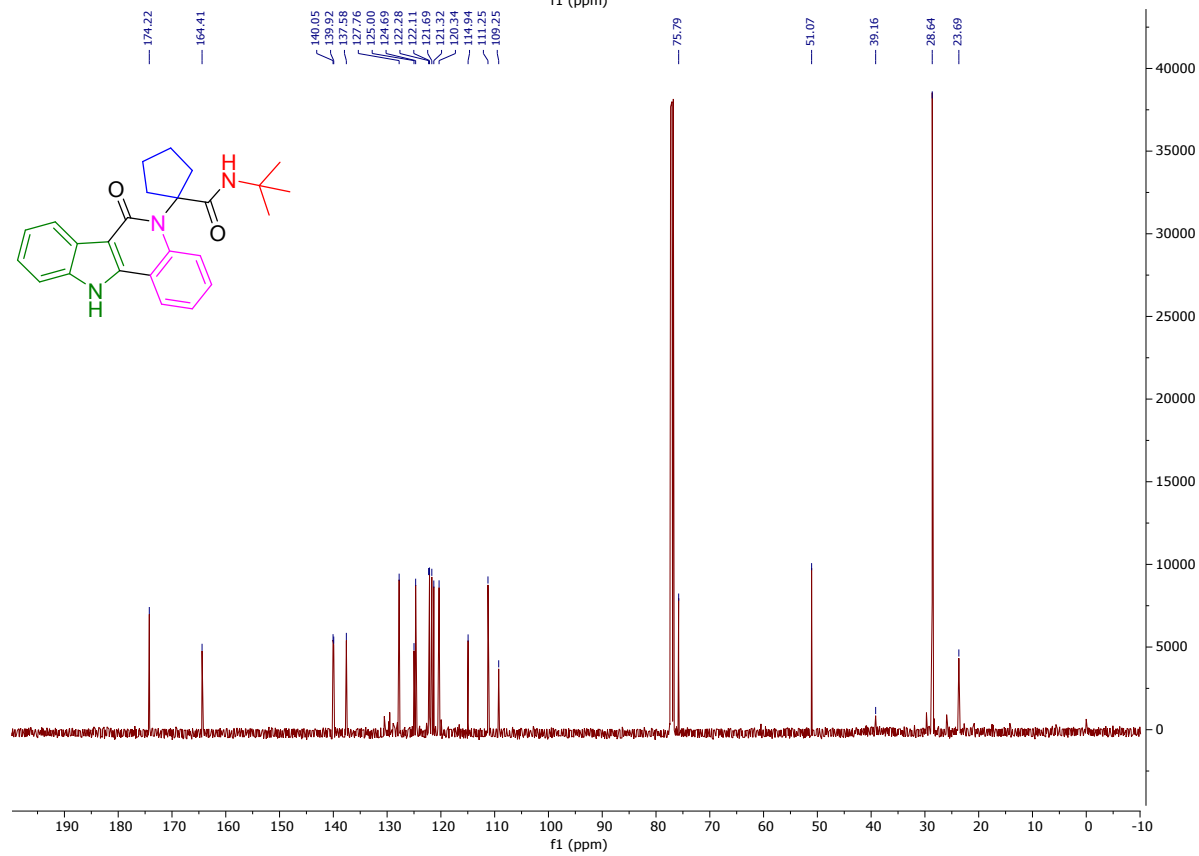

**6j: 2-(8-Chloro-6-oxo-6,11-dihydro-5H-indolo[3,2-c]quinolin-5-yl)-N-(4-methoxyphenethyl)acetamide**

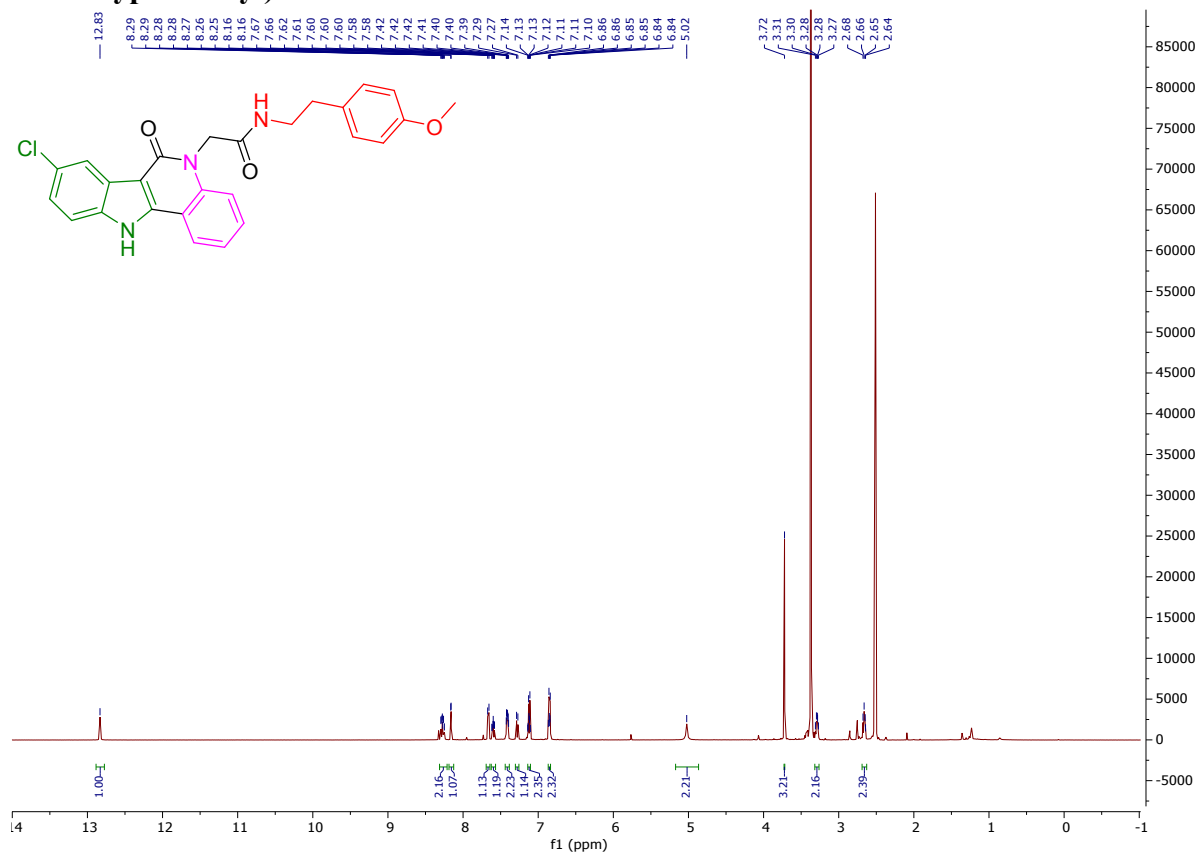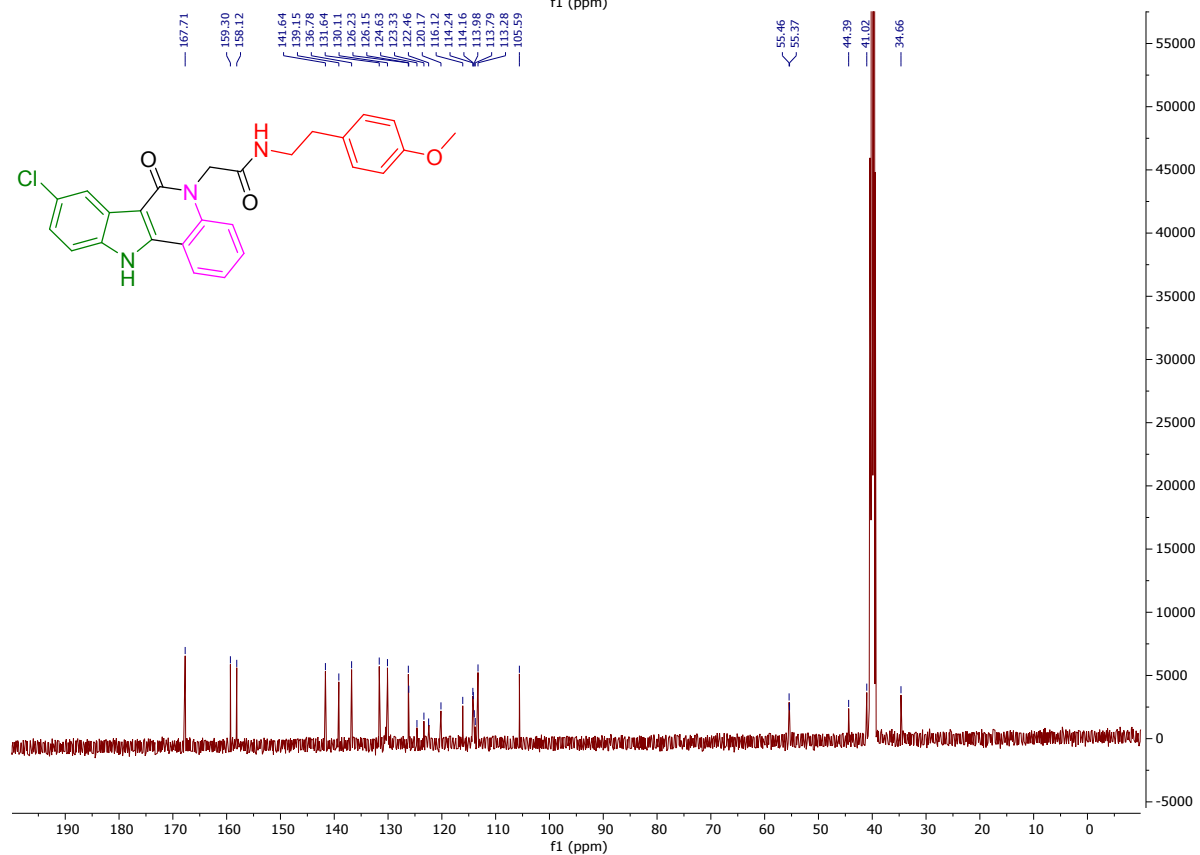

**6k: *Tert*-butyl (5-(2-(benzylamino)-2-oxoethyl)-6-oxo-6,11-dihydro-5*H*-indolo[3,2-*c*]quinolin-2-yl)carbamate**

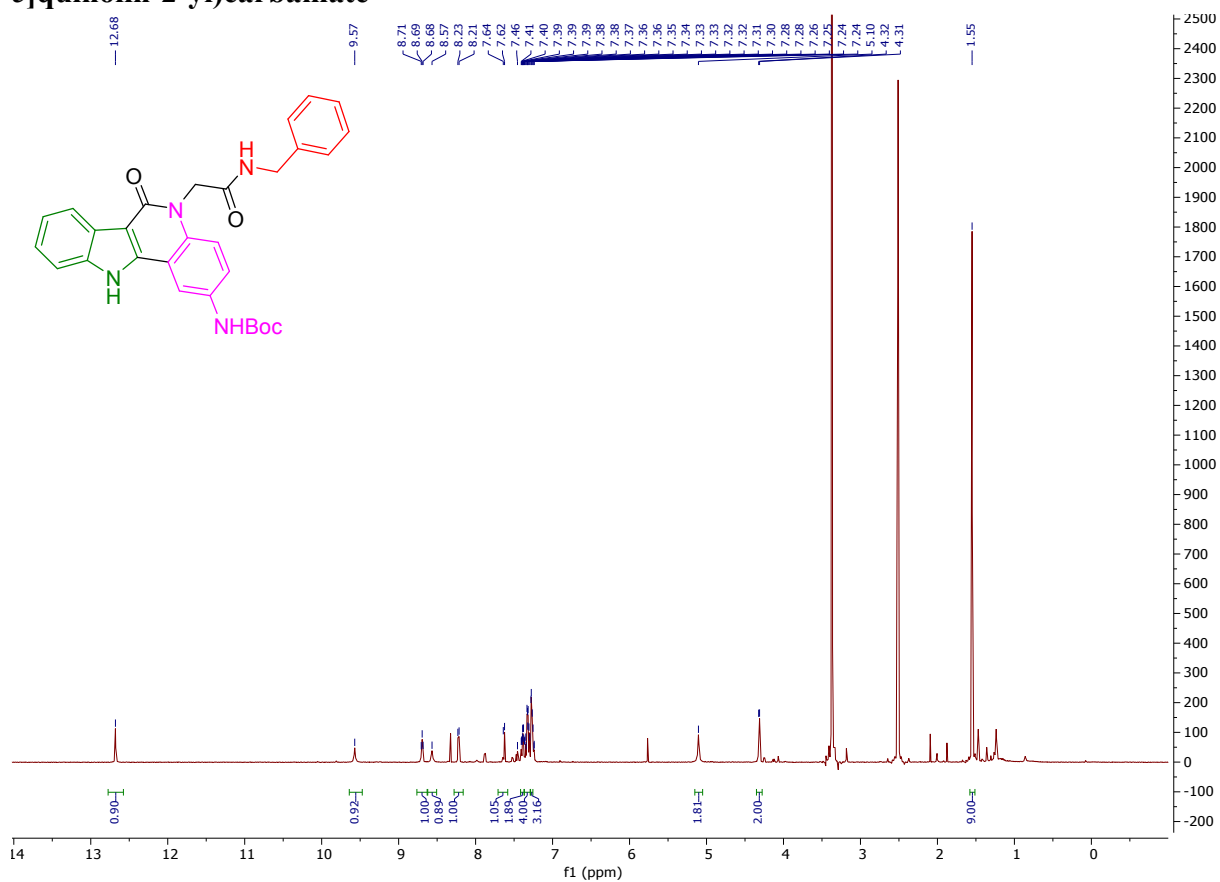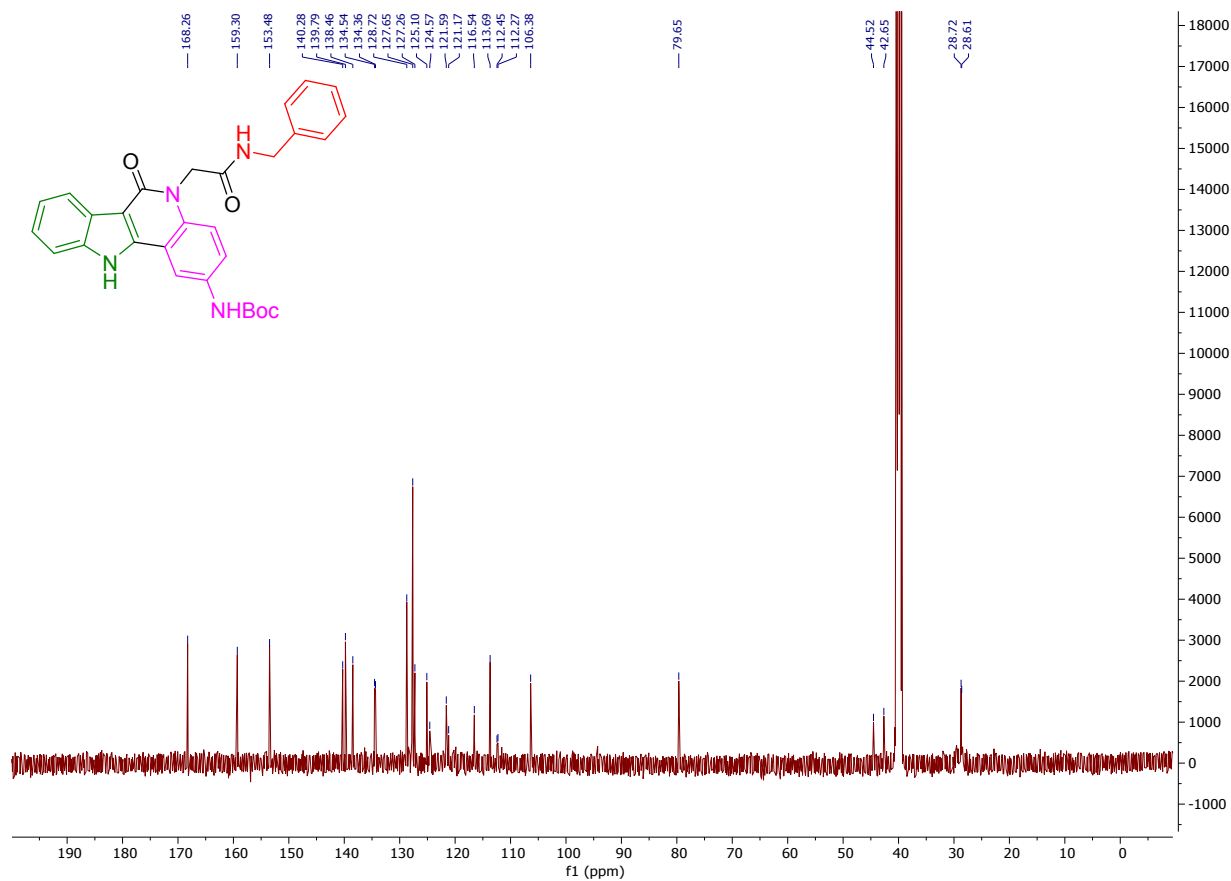

**6l: *N*-(*tert*-butyl)-2-(2,9-dimethoxy-6-oxo-6,11-dihydro-5*H*-indolo[3,2-*c*]quinolin-5-yl)acetamide**

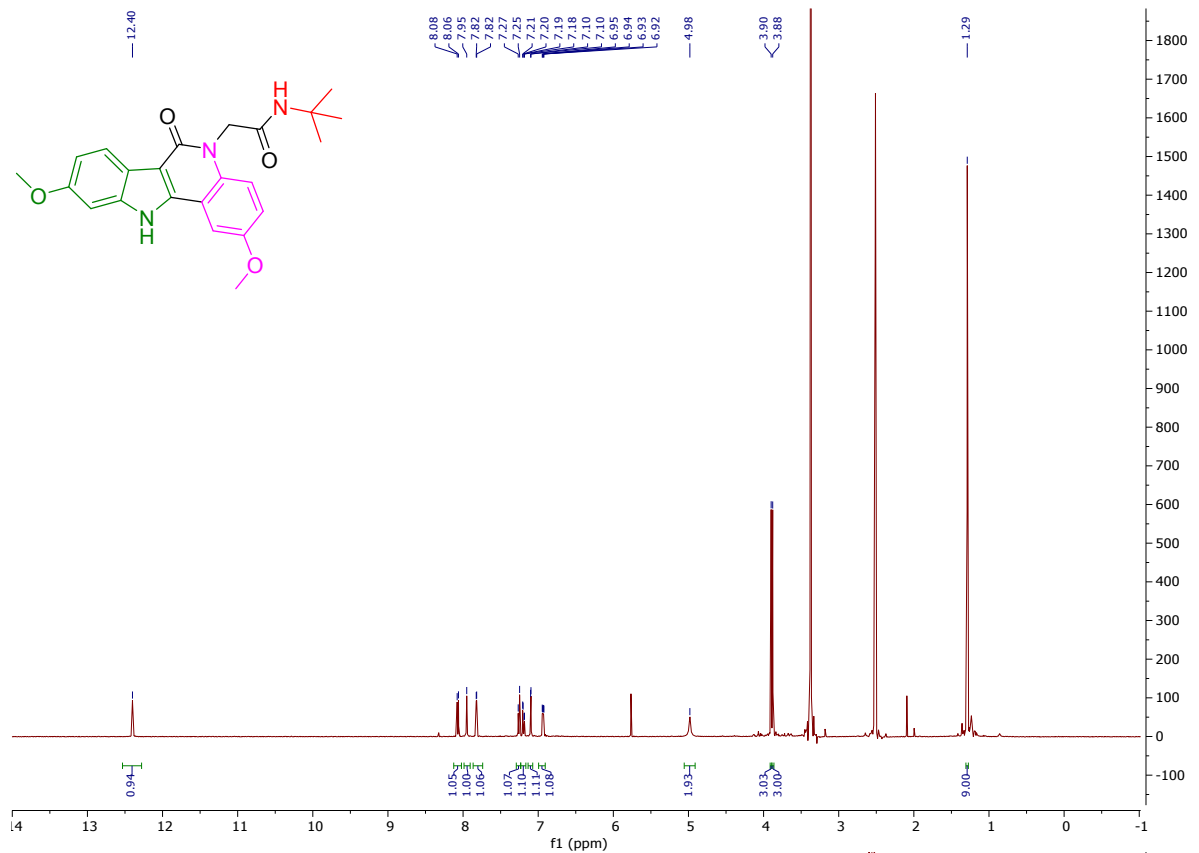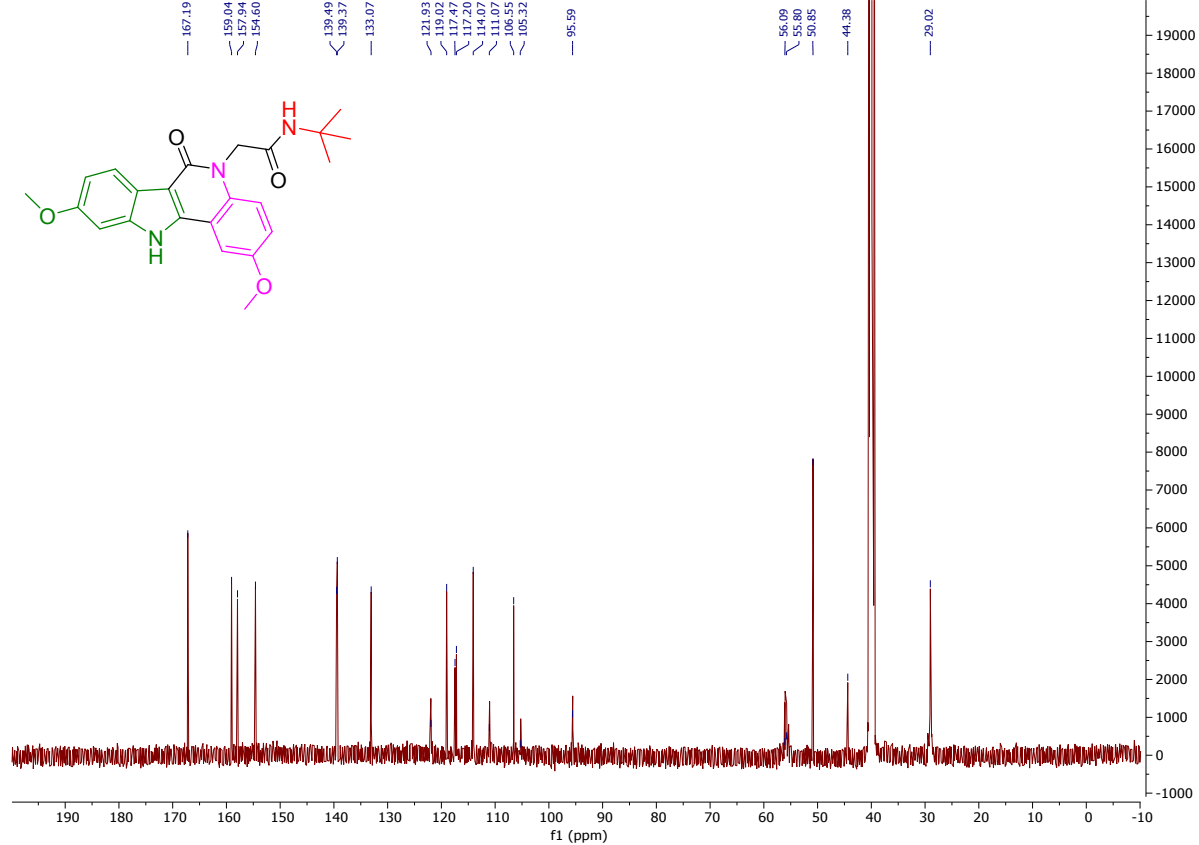



**6m: *N*-butyl-2-(9-methoxy-2-methyl-6-oxo-6,11-dihydro-5*H*-indolo[3,2-*c*]quinolin-5-yl)acetamide**

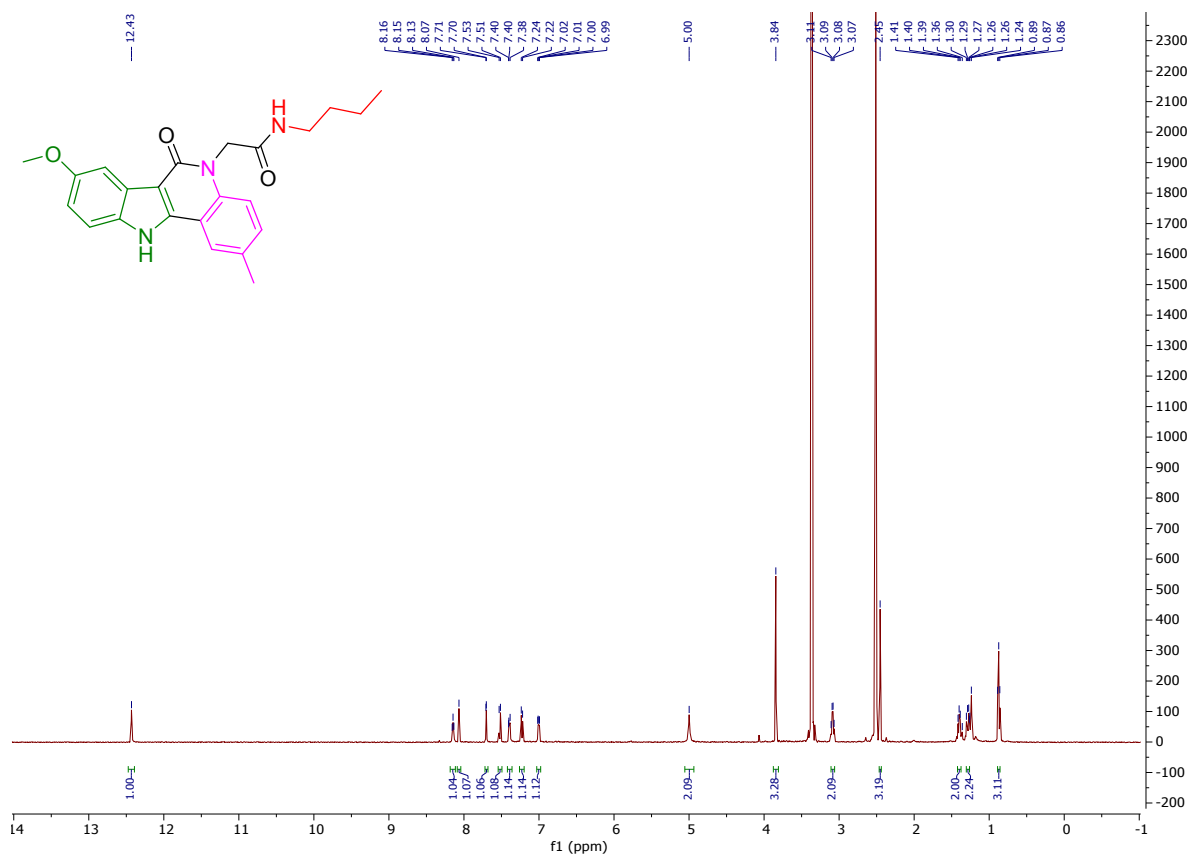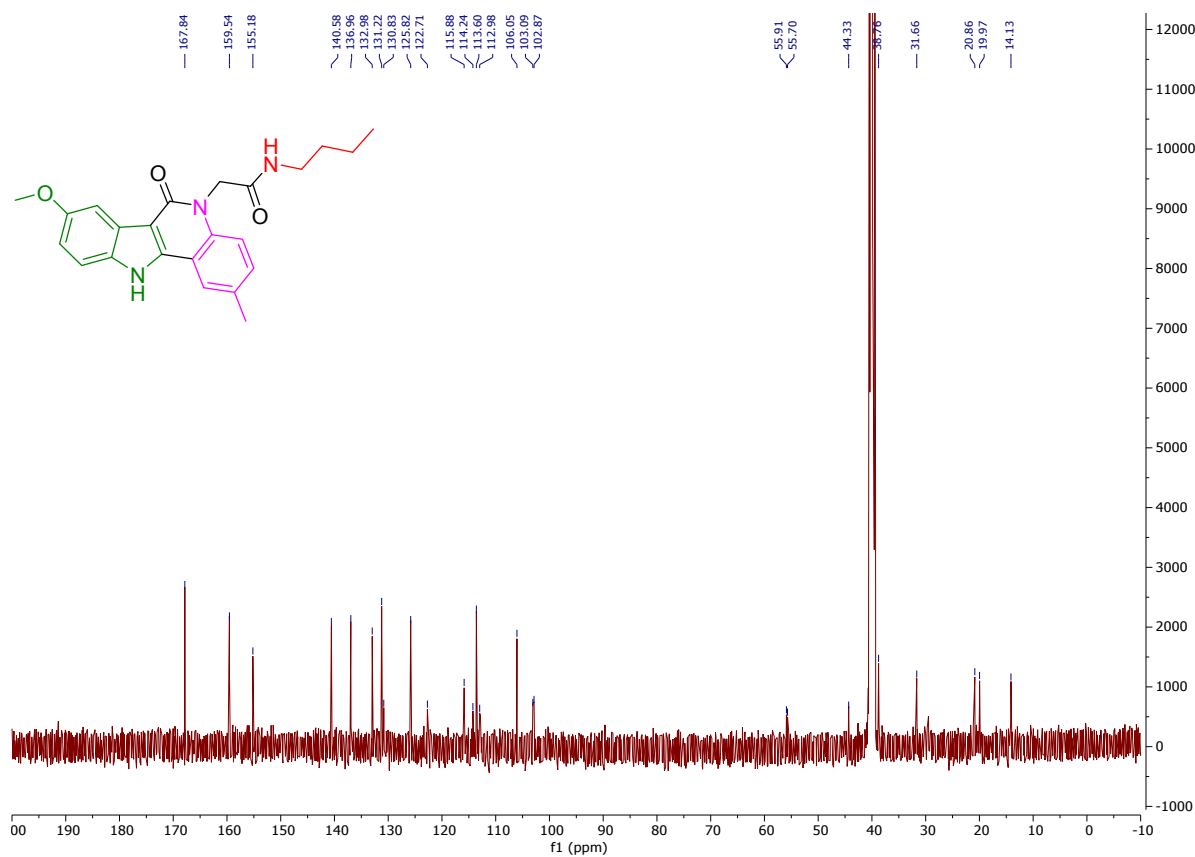

**6n: N-cyclohexyl-2-(9-methoxy-6-oxo-6,11-dihydro-5H-indolo[3,2-c]quinolin-5-yl)acetamide**

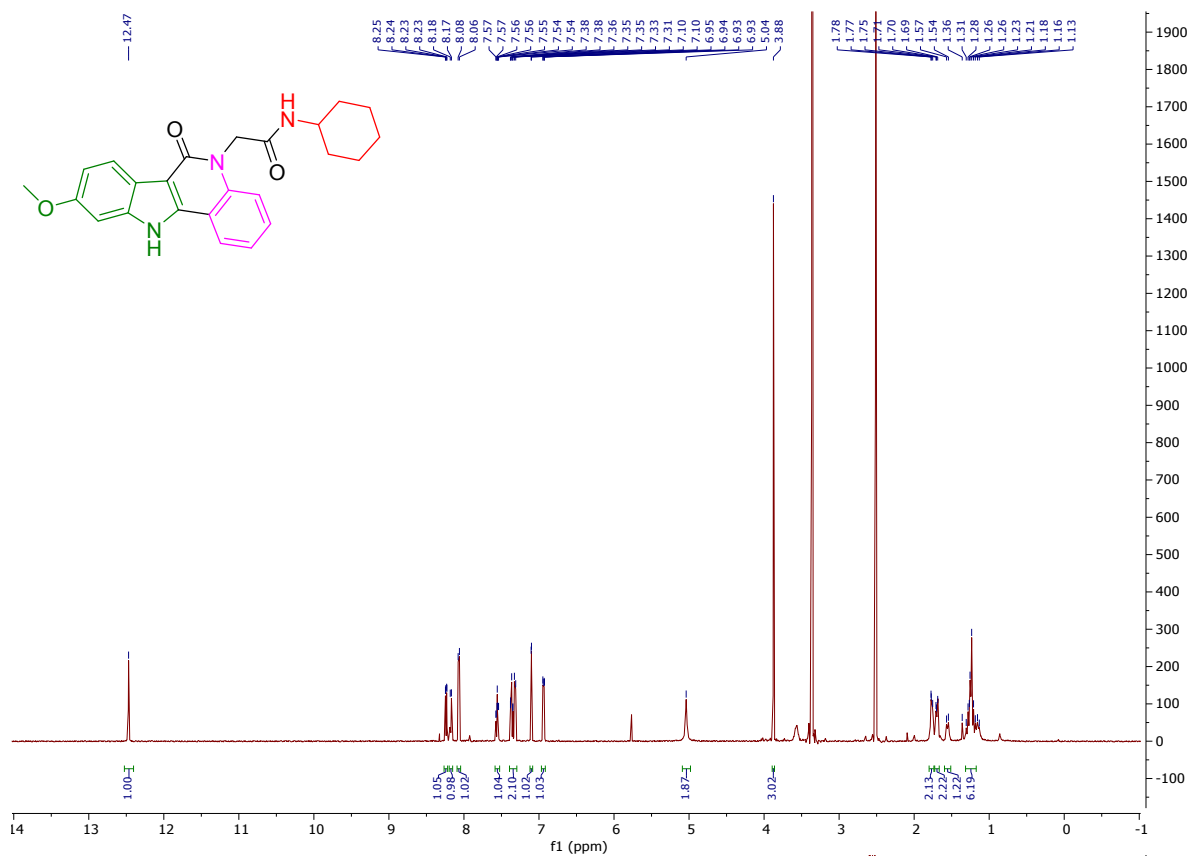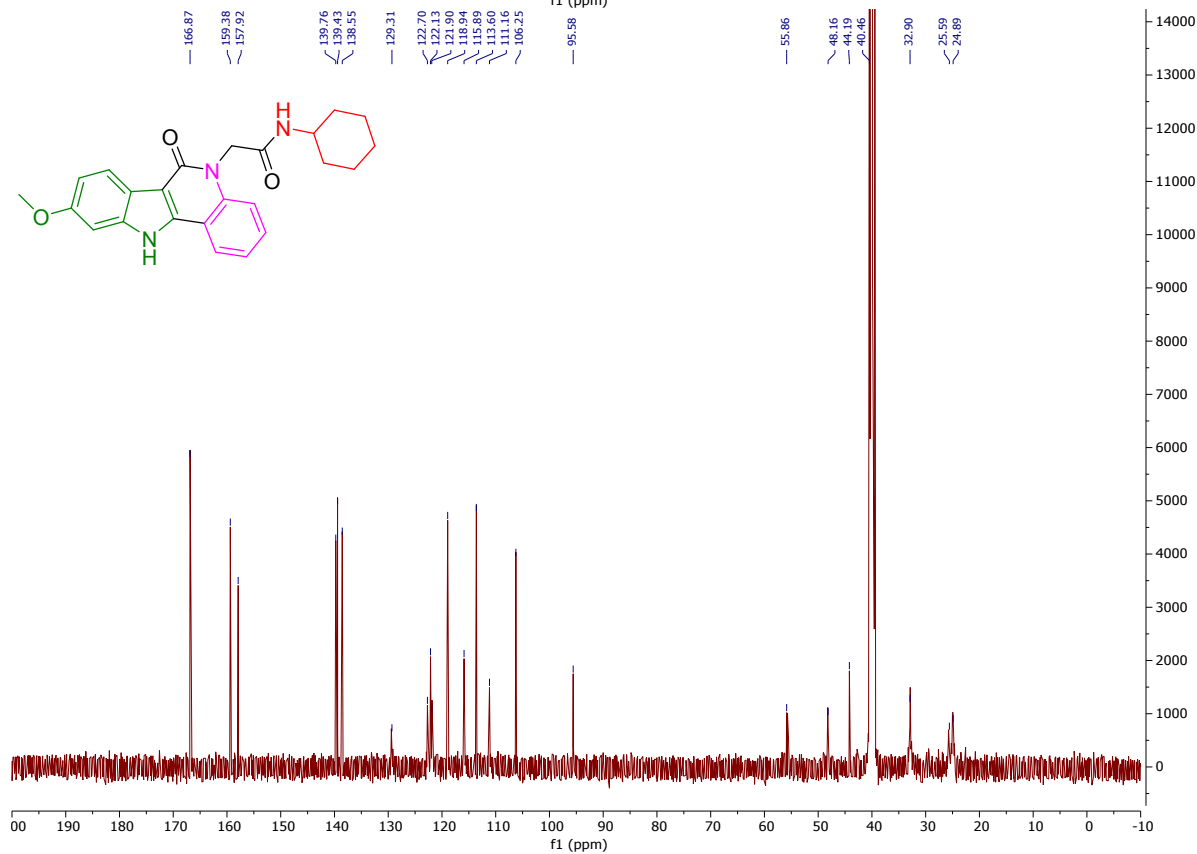

**6o: N-(2,3-Dimethoxybenzyl)-2-(9-methoxy-2-methyl-6-oxo-6,11-dihydro-5H-indolo[3,2-c]quinolin-5-yl)acetamide**

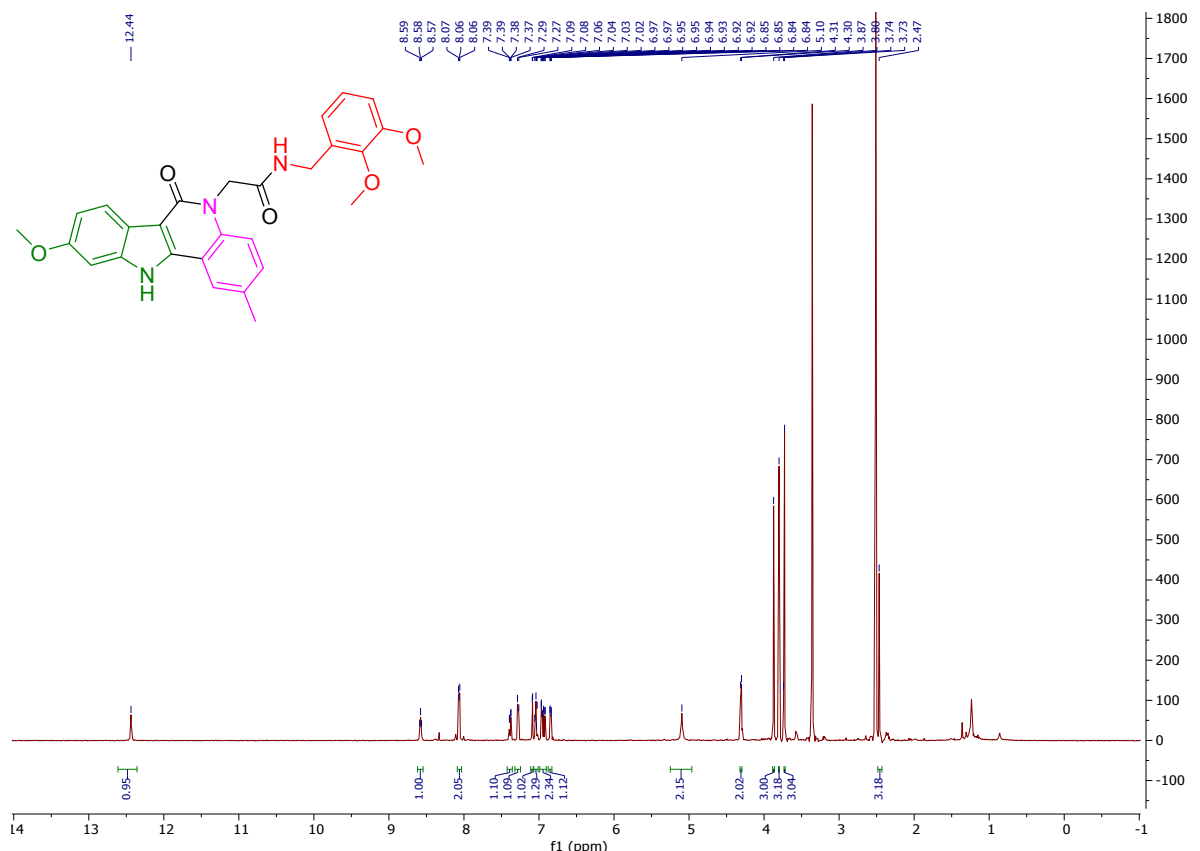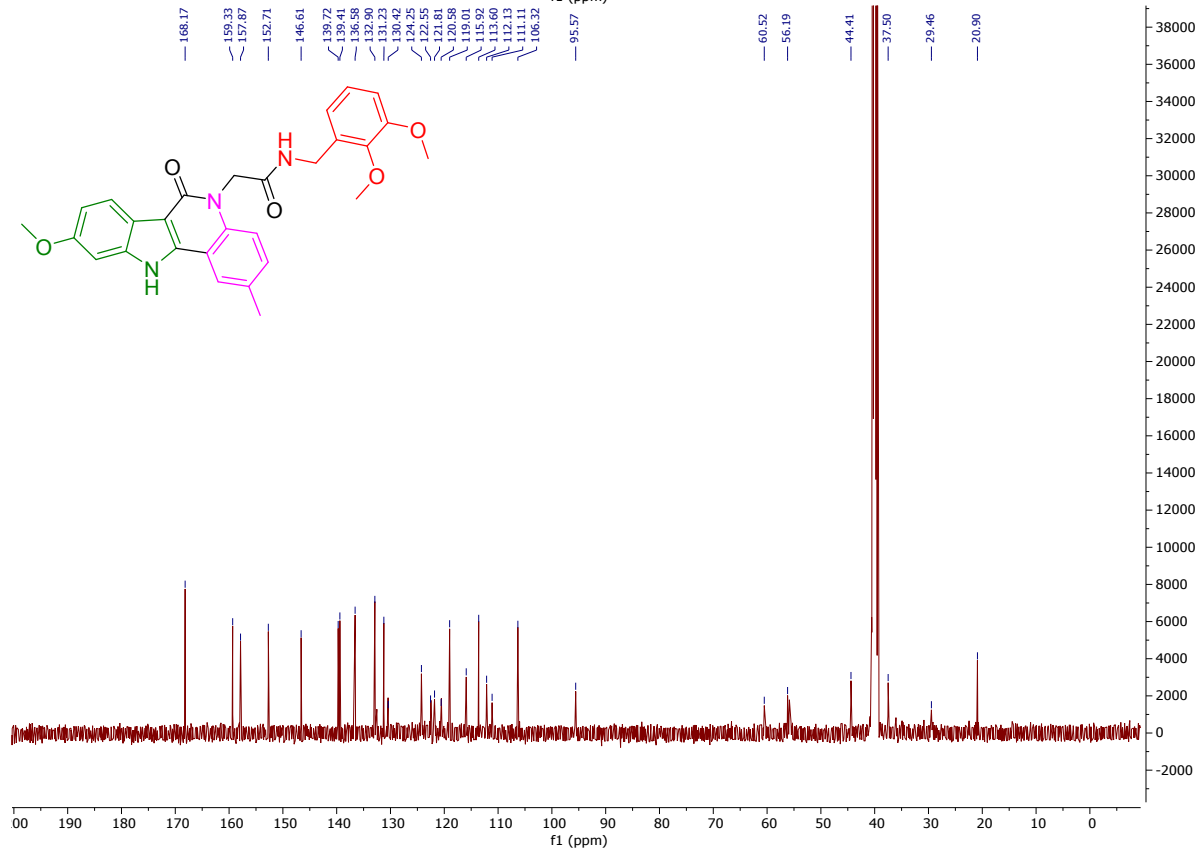

**6p: 2-(8-Chloro-6-oxo-6,11-dihydro-5H-indolo[3,2-c]quinolin-5-yl)-N-(1-(4-methoxyphenyl)ethyl)acetamide**

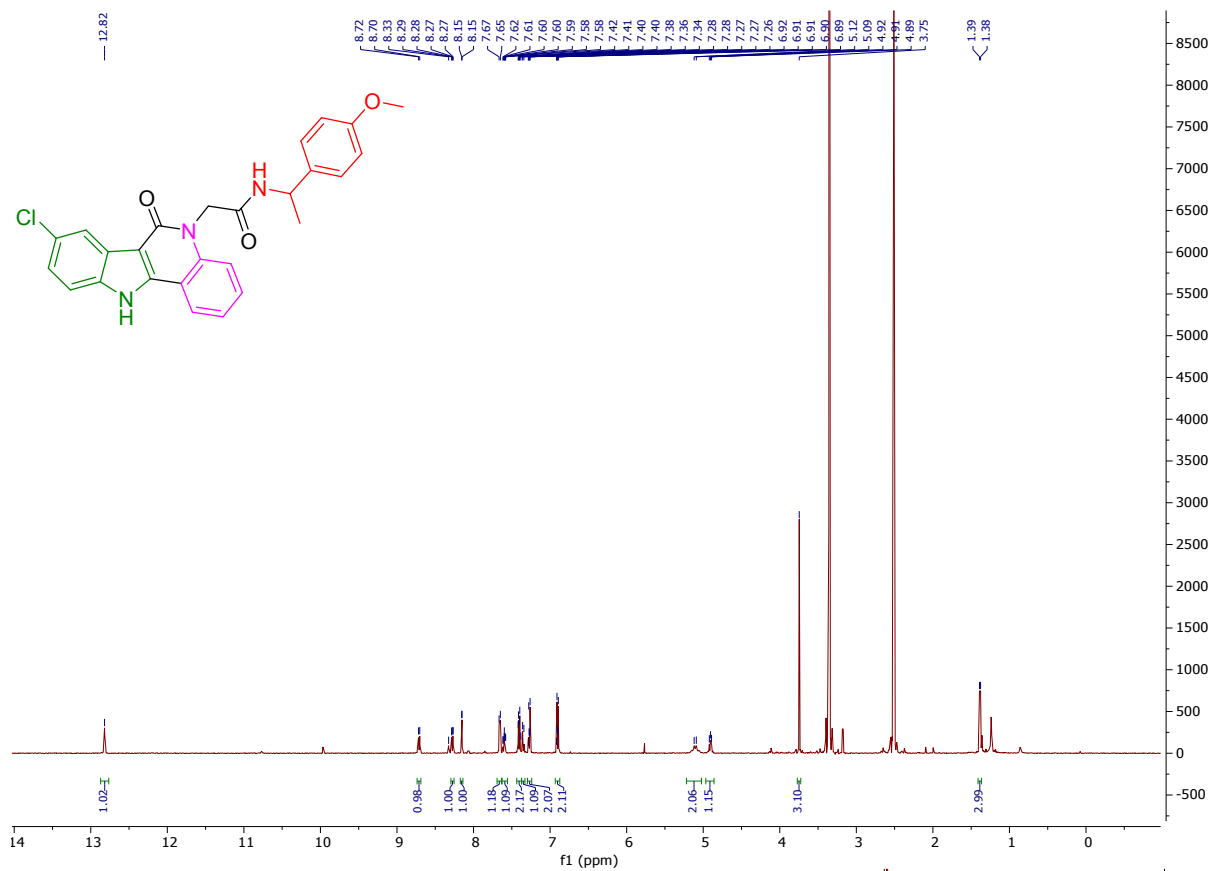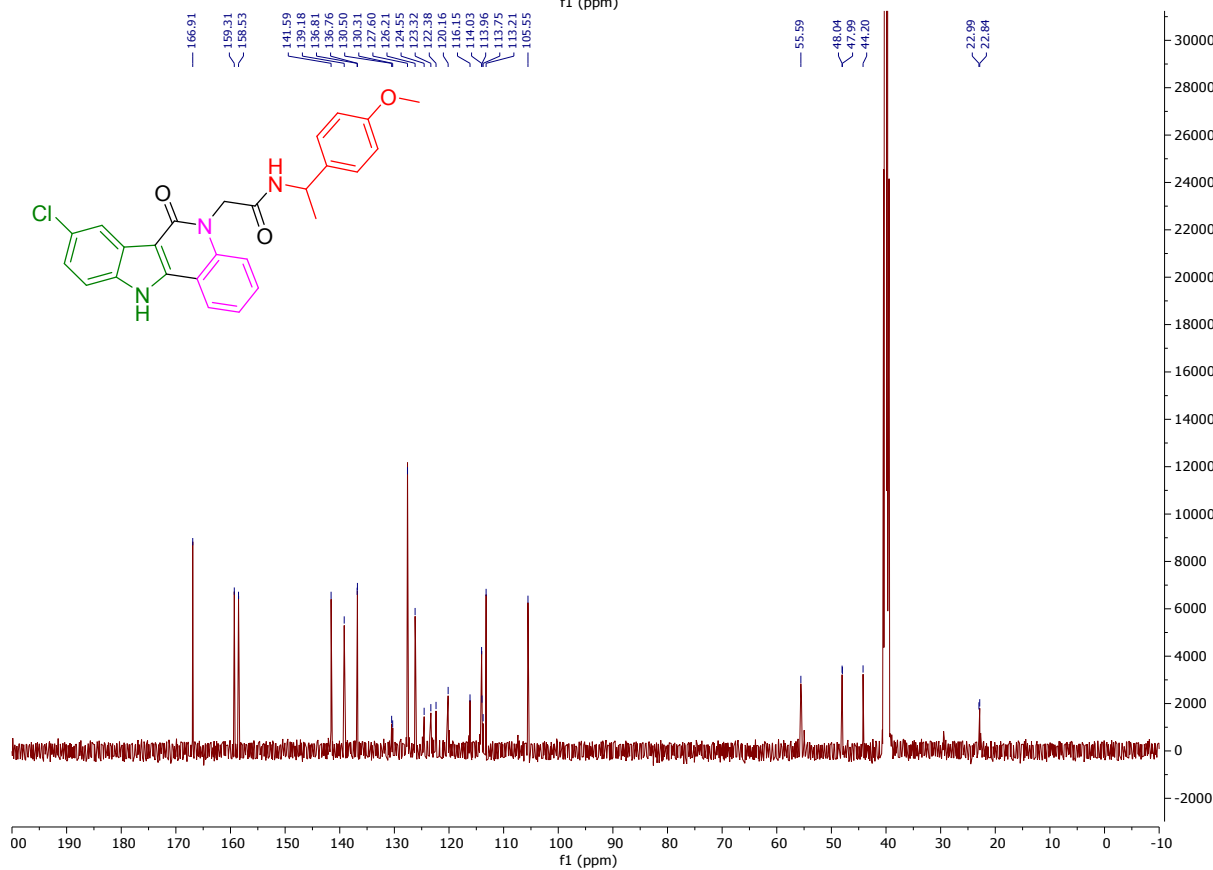

**6q: 2-(4-Methyl-6-oxo-6,11-dihydro-5H-indolo[3,2-c]quinolin-5-yl)-N-(2,4,4-trimethylpentan-2-yl)acetamide**

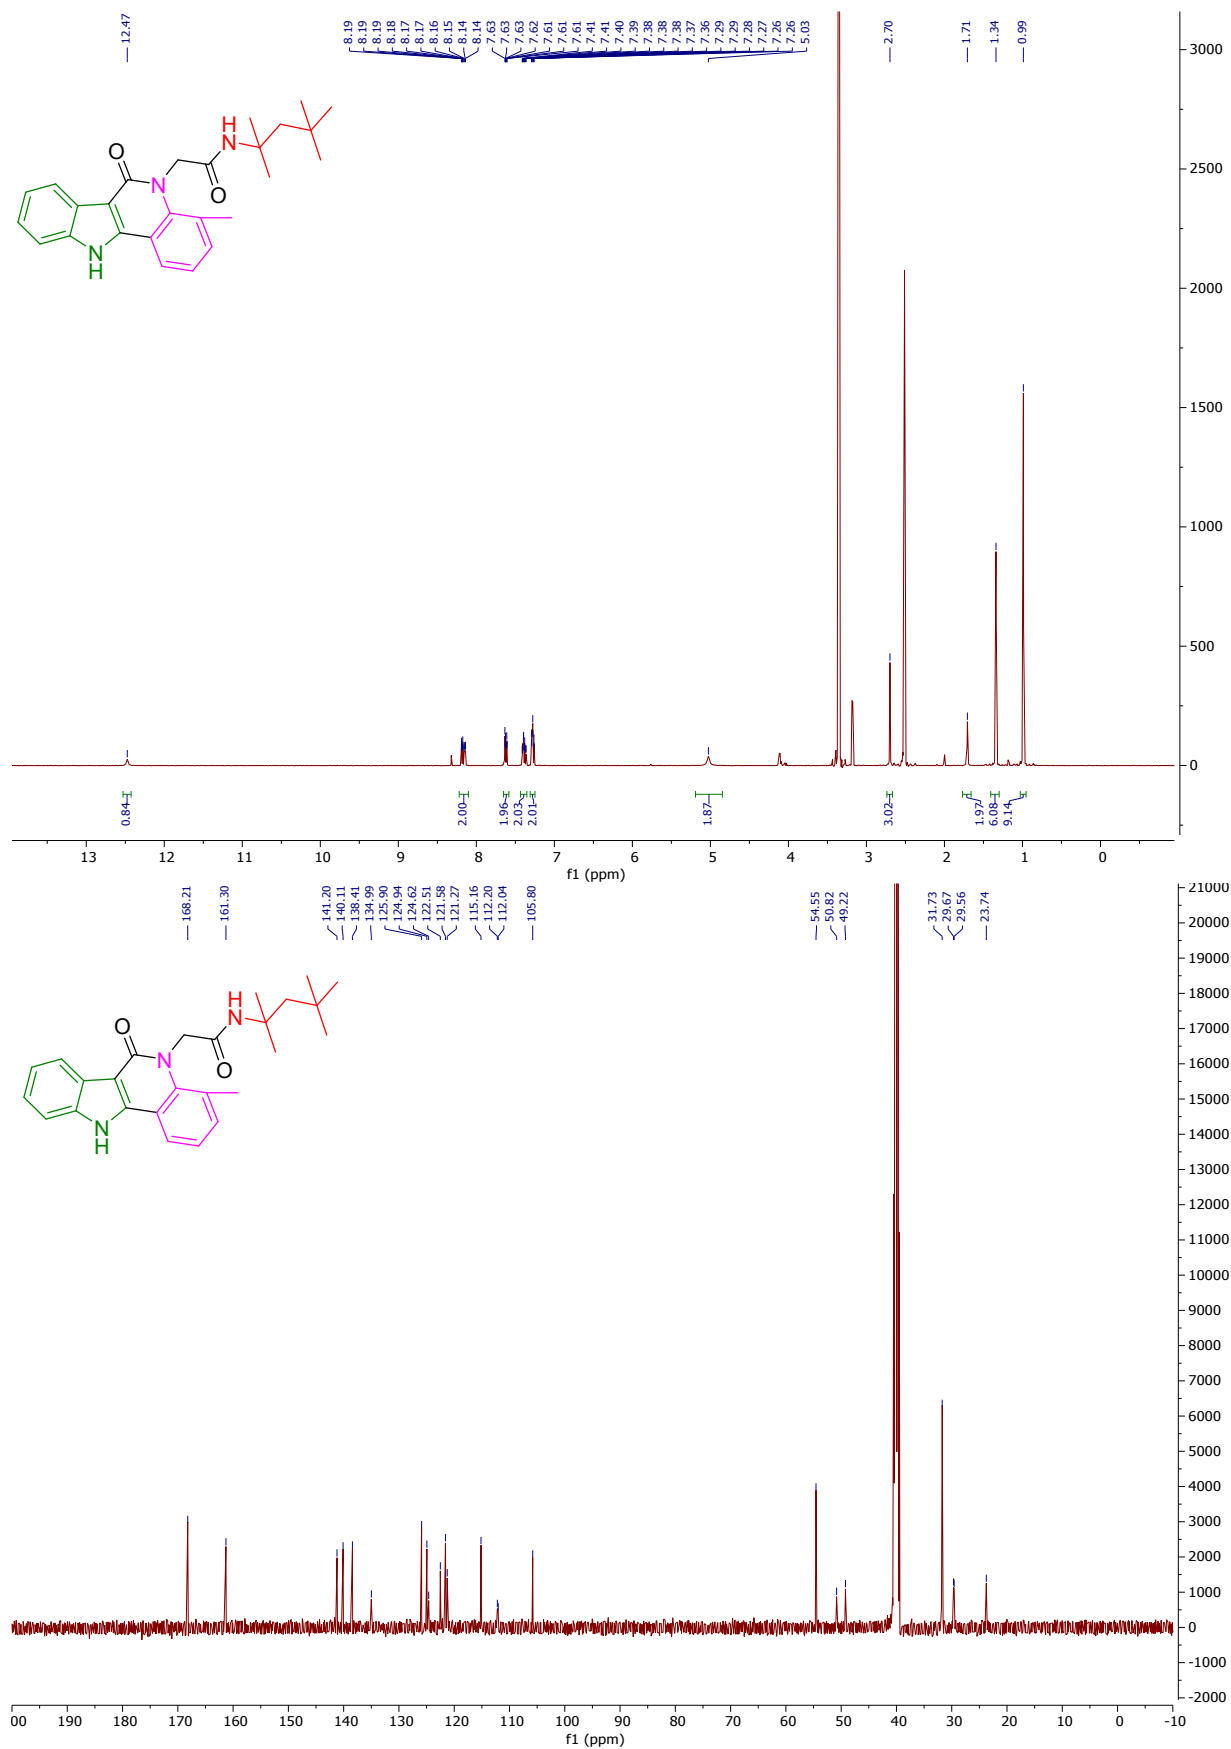

**6r: *N*-(*tert*-butyl)-2-(11-methyl-6-oxo-6,11-dihydro-5*H*-indolo[3,2-*c*]quinolin-5-yl)acetamide**

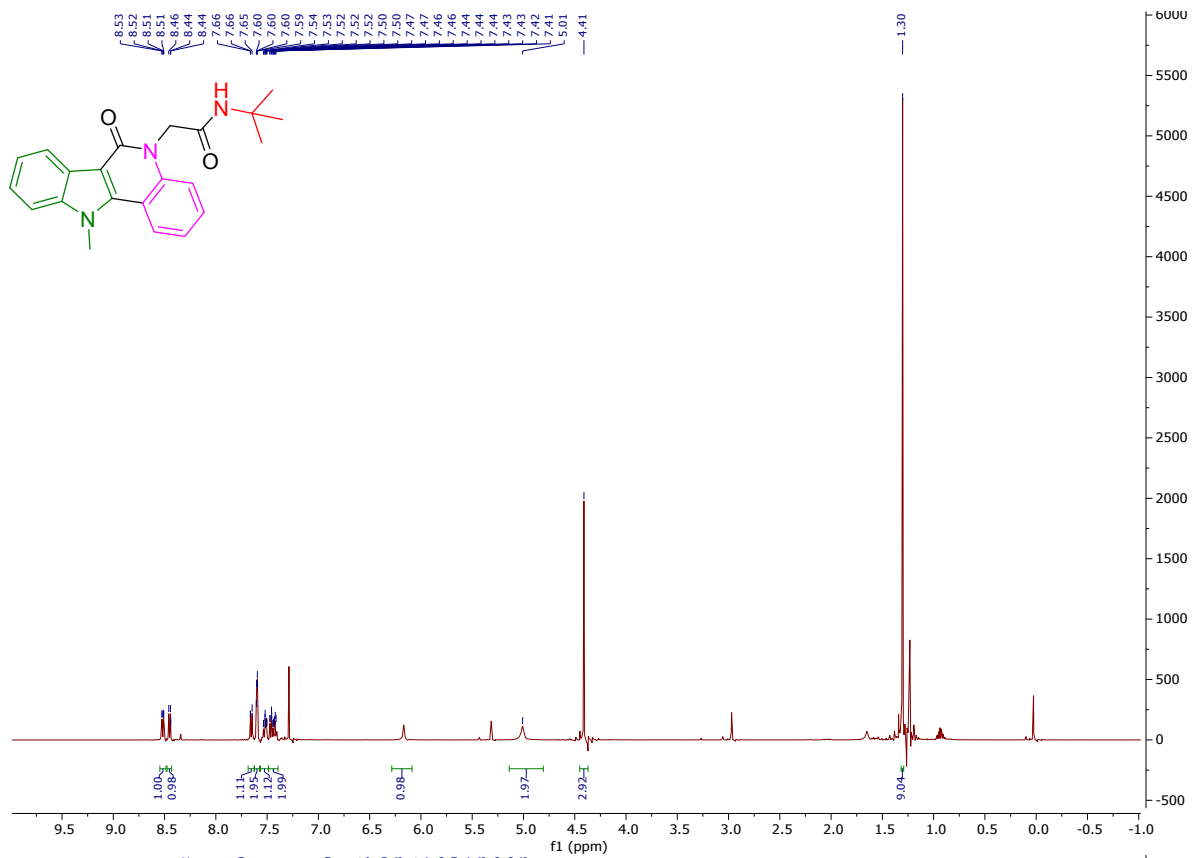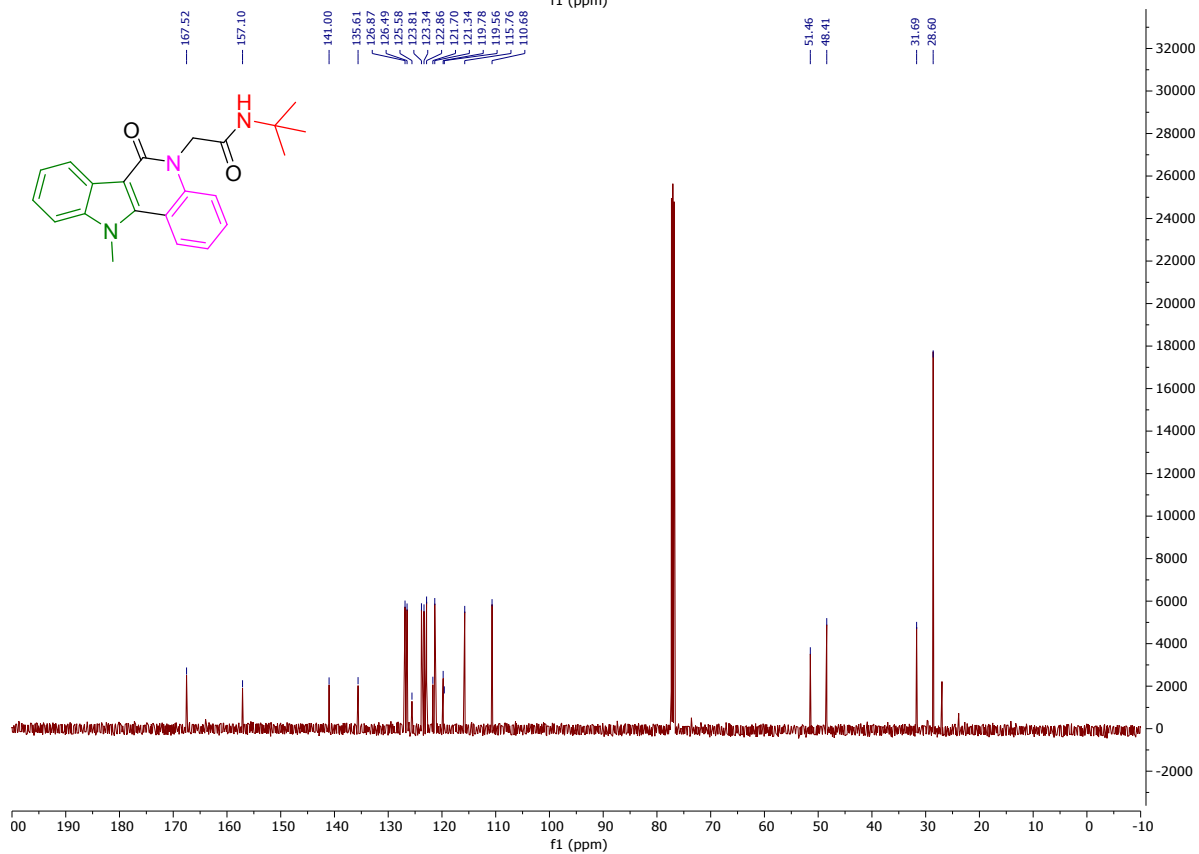

## Docking Procedure

All the synthesized compounds were converted to 2D-structures with OpenBabel.<sup>S1</sup> Conformers were generated with Moloc.<sup>S2</sup> The conformers were subsequently docked in the crystal structure with PDB code 3CY2<sup>S3</sup> using Moloc. The poses were visualized with Pymol,<sup>S4</sup> which was also used to create the docking figure.

## X-ray structure determination

Single crystals were obtained from EtOH solutions by vapour diffusion in room temperature. A polycyclic fragment is planar with accuracy of 0.05 Å in structure **6b** and 0.02 Å in structure **6c**. The existence of extended  $\pi$ -system results in formation of stacking dimers in the crystal phase (Figure 3). The distance between  $\pi$ -systems is 3.35 Å (C11...C6 contact, 1-x,1-y,1-z symmetry operation) in structure **6b** and 3.51 Å (C12...C6 contact, 1-x,1-y,1-z symmetry operation) in structure **6c**. Stacked molecules are bound additionally by the N1-H...O2' and C13-H...O2' intermolecular hydrogen bonds in both structures (Table S1, Supporting Information). Moreover, the presence of the methyl substituent in compound **6c** causes the additional formation of the C16-H... $\pi$  (C5) intermolecular hydrogen bond in dimer of molecules **6c**. Stacked dimers are bound by the N3-H...O1' (1-x,-y,1-z) hydrogen bonds (Table S1, Supporting Information).

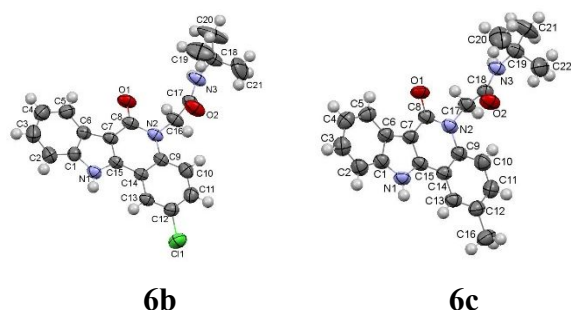

**Figure S1.** Molecular structures of selected compounds according to X-ray diffraction data. Thermal ellipsoids are shown at the 50 % probability level.

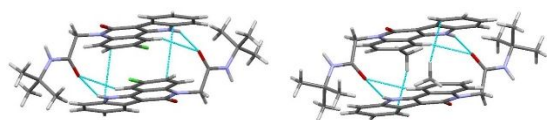

**Figure S2.** Stacking dimers of compounds **6b** (on the left) and **6c** (on the right) in the crystal phase.

The crystals of **6b** (C<sub>21</sub>H<sub>20</sub>N<sub>3</sub>O<sub>2</sub>Cl) are monoclinic. At 293 K,  $a = 12.540(2)$  Å,  $b = 11.523(2)$  Å,  $c = 13.578(2)$  Å,  $\beta = 96.66(1)^\circ$ ,  $V = 1948.7(5)$  Å<sup>3</sup>,  $M_r = 381.85$ ,  $Z = 4$ , space group P2<sub>1</sub>/n,  $d_{calc} = 1.302$  g/cm<sup>3</sup>,  $\mu(\text{MoK}\alpha) = 0.217$  mm<sup>-1</sup>,  $F(000) = 800$ .

The crystals of **6c** (C<sub>22</sub>H<sub>23</sub>N<sub>3</sub>O<sub>2</sub>) are monoclinic. At 293 K,  $a = 7.8798(7)$  Å,  $b = 11.5501(8)$  Å,  $c = 21.251(2)$  Å,  $\beta = 100.393(8)^\circ$ ,  $V = 1902.4(3)$  Å<sup>3</sup>,  $M_r = 361.43$ ,  $Z = 4$ , space group P2<sub>1</sub>/c,  $d_{calc} = 1.262$  g/cm<sup>3</sup>,  $\mu(\text{MoK}\alpha) = 0.082$  mm<sup>-1</sup>,  $F(000) = 768$ .

Intensities of 19814 reflections (5577 independent,  $R_{int} = 0.097$ ) for **6b** and 20215 reflections (5437 independent,  $R_{int} = 0.071$ ) for **6c** were measured on an Xcalibur 3 diffractometer (graphite monochromated MoK<sub>α</sub> radiation, CCD-detector,  $\omega$  scanning,  $2\theta_{max} = 60^\circ$ ).

The structures were solved by direct method using SHELXTL package.<sup>S5</sup> Positions of hydrogen atoms were located from electron density difference maps and refined using riding model with  $U_{iso} = nU_{eq}$  ( $n = 1.5$  for methyl groups and 1.2 for other hydrogen atoms). Full-matrix least-squares refinement against  $F^2$  in anisotropic approximation for non-hydrogen atoms was converged to  $wR_2 = 0.147$  for 5577 reflections ( $R_I = 0.065$  for 2325 reflections with  $F > 4\sigma(F)$ ,  $S = 0.872$ ) in the case of **6b**, and  $wR_2 = 0.157$  for 5437 reflections ( $R_I = 0.064$  for 2281 reflections with  $F > 4\sigma(F)$ ,  $S = 0.870$ ) in the case of **6c**.

Final atomic coordinates, geometrical parameters and crystallographic data have been deposited with the Cambridge Crystallographic Data Centre, 11 Union Road, Cambridge, CB2 1EZ, UK (E-mail: [deposit@ccdc.cam.ac.uk](mailto:deposit@ccdc.cam.ac.uk); fax: +44 1223 336033) and are available on request quoting the deposition numbers 1912181 (**6b**) and 1912182 (**6c**).

**Table S1 Intermolecular hydrogen bonds in structures 6b and 6c**

| Hydrogen bond        | Symmetry operation | Geometrical characteristics |              |
|----------------------|--------------------|-----------------------------|--------------|
|                      |                    | H...A, Å                    | D-H...A, deg |
| <b>Structure 6b</b>  |                    |                             |              |
| N1-H...O2            | 1-x,1-y,1-z        | 1.99                        | 149          |
| C13-H...O2           | 1-x,1-y,1-z        | 2.60                        | 144          |
| N3-H...O1            | 1-x,-y,1-z         | 2.04                        | 178          |
| <b>Structure 6c</b>  |                    |                             |              |
| N1-H...O2            | 1-x,1-y,1-z        | 1.98                        | 154          |
| C13-H...O2           | 1-x,1-y,1-z        | 2.66                        | 151          |
| C16-H...C5 ( $\pi$ ) | 1-x,1-y,1-z        | 2.74                        | 150          |
| N3-H...O1            | 1-x,-y,1-z         | 2.07                        | 156          |

## References



- (S1) O'Boyle, N. M.; Banck, M.; James, C. A.; Morley, C.; Vandermeersch, T.; Hutchison, G. R. Open Babel: An Open Chemical Toolbox. *J. Cheminform.* **2011**, *3*, 33-46.
- (S2) Gerber, P. R.; Müller, K. MAB, A Generally Applicable Molecular Force Field for Structure Modelling in Medicinal Chemistry. *J. Comput.-Aided Mol. Des.* **1995**, *9*, 251-268.
- (S3) Huber, K.; Brault, L.; Fedorov, O.; Gasser, C.; Filippakopoulos, P.; Bullock, A. N.; Fabbro, D.; Trappe, J.; Schwaller, J.; Knapp, S.; Bracher, F. 7,8-Dichloro-1-oxo- $\beta$ -carbolines as a Versatile Scaffold for the Development of Potent and Selective Kinase Inhibitors with Unusual Binding Modes. *J. Med. Chem.* **2012**, *55*, 403-413.
- (S4) Schrodinger, L. The PyMOL Molecular Graphics System, Version 1.3r1. **2010**.
- (S5) Sheldrick, G. M. A Short History of SHELX. *Acta Cryst.* **2008**, *A64*, 112-122.
